# Supplementary material for: Woody species do not differ in dormancy progression: Differences in time to budbreak due to forcing and cold hardiness
Source: PubMed Central journal article supplement — Proc Natl Acad Sci U S A. 2022 May 2;119(19):e2112250119. doi: 10.1073/pnas.2112250119 (PMC9171508; doi:10.1073/pnas.2112250119), 2022-05-02
Supplement: pnas.2112250119.sapp.pdf [file pnas.2112250119.sapp.pdf]

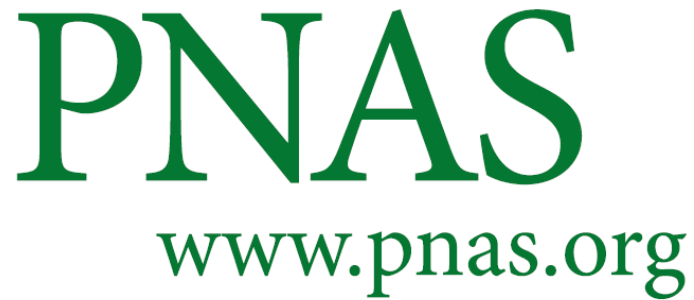

**Supplementary Information for**

**Woody species do not differ in dormancy progression: differences in time to budbreak due to forcing and cold hardiness**

Al Kovaleski

Email: [al.kovaleski@wisc.edu](mailto:al.kovaleski@wisc.edu)

**This PDF file includes:**

- Supplementary text
  - Integrating Cold Hardiness and Budbreak (Figures S1-S6)
  - Materials and Methods
  - SI References
- Figures S7 to S52
- Tables S1 to S5

**Supplementary Information Text**  
**Integrating Cold Hardiness and Budbreak**

Throughout the work presented, the idea of a connection between spring phenology as budbreak and cold hardiness dynamics is introduced. The two aspects are shown to be mathematically linked in many species, which suggests a new way of studying dormancy that may bring clarity to this elusive aspect of perennial plants. Because of the novelty of the parameters shown, here I present examples of how each of the parameters related to cold hardiness can affect the universally measured time to 50% budbreak ( $BB_{50}$ ). The hypothetical examples presented are cases explored in relation to the following **Eq. 1** and **Eq. 4** presented in the main text:

$$Time\ to\ Budbreak = \frac{|CH_0 - CH_{BB}|}{k_{deacc}^*} \quad [Eq. 1]$$

$$k_{deaccT}^* = \max k_{deaccT} \times \Psi_{deacc} \quad [Eq. 4]$$

where  $CH_0$  is the initial cold hardiness (referred to in the main text as the “departure point”),  $CH_{BB}$  is the cold hardiness at budbreak,  $k_{deacc}^*$  is the effective rate of deacclimation.  $k_{deaccT}^*$  is the effective rate of deacclimation at temperature T, which is a result of the product of the maximum rate of deacclimation at temperature T ( $\max k_{deaccT}$ ) and the deacclimation potential ( $\Psi_{deacc}$ ). The cold hardiness at budbreak ( $CH_{BB}$ ) is estimated based on the estimated cold hardiness from the deacclimation assay at the time when 50% budbreak is observed (**SI Appendix Fig. S1**).

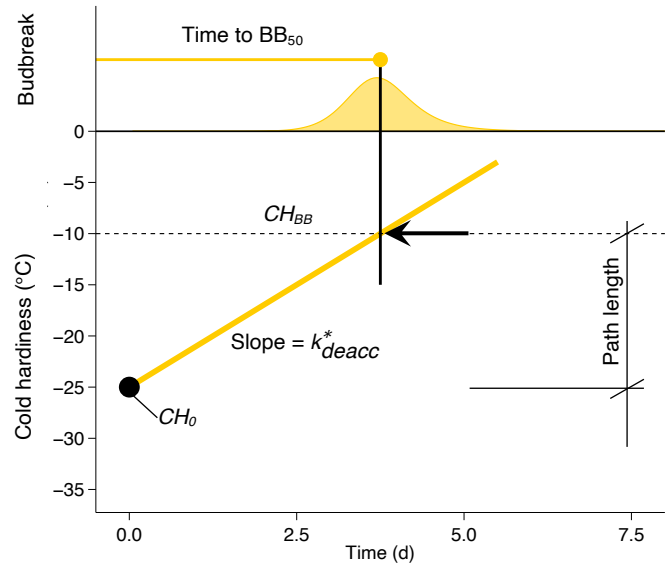

**Figure S1. Schematic view of variables used in this study.** The initial cold hardiness ( $CH_0$ ) is the cold hardiness of buds collected from the field. The effective rate of deacclimation  $k_{deacc}^*$  is the slope of the deacclimation of buds in controlled environment. The time to 50% budbreak ( $BB_{50}$ ) is measured in the same controlled environment as deacclimation. Cold hardiness at budbreak ( $CH_{BB}$ ) is estimated based on the cold hardiness estimate when  $BB_{50}$  occurs. The path length is the distance in °C from  $CH_0$  to  $CH_{BB}$ .

**1. Differing rates of deacclimation, with constant initial cold hardiness and cold hardiness at budbreak**

When comparing two samples that have the same initial cold hardiness ( $CH_0$ ) and same cold hardiness at budbreak ( $CH_{BB}$ ), this means the path length is the same for these samples (**SI Appendix Fig. S2**). The path length (in °C) is a measurement of how much cold hardiness must be lost before budbreak is observed. In this example, two different effective  $k$  rates of deacclimation ( $k_{deacc}^*$ ) are presented (the slopes of the lines), where the rate is higher in “**A**” than in “**B**”. What occurs, in terms of visible phenotype, is that budbreak in “**A**” is observed earlier than in “**B**”. In addition, the duration of budbreak is shorter, or more concentrated, in “**A**” than in “**B**”. This is a result of the “shallower angle” with which the buds deacclimating in “**B**” reach the cold hardiness at budbreak.

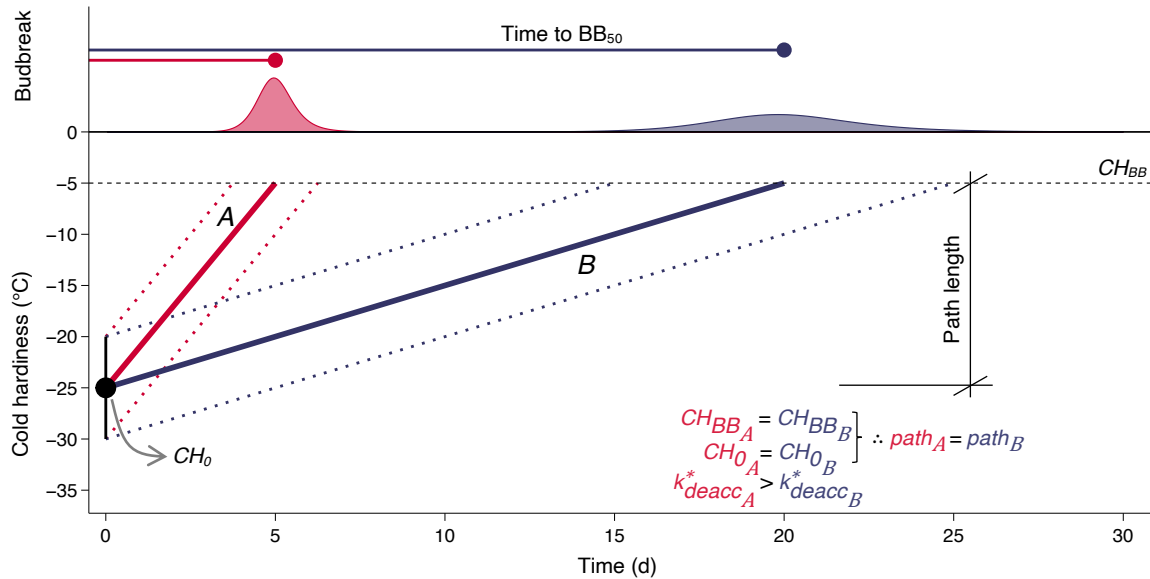

**Figure S2. Different rates of deacclimation.** Without varying initial cold hardiness ( $CH_{0A} = CH_{0B}$ ) or cold hardiness at budbreak ( $CH_{BB_A} = CH_{BB_B}$ ), the path length remains the same ( $path_A = path_B$ ). However, as rate of deacclimation in A ( $k_{deacc_A}^*$ ) is greater than in B ( $k_{deacc_B}^*$ ), 50% budbreak ( $BB_{50}$ ) is earlier and more concentrated in time.

## 2. Different cold hardiness at budbreak, with constant rate of deacclimation and initial cold hardiness

In this example, initial cold hardiness and rates of deacclimation are kept constant, but cold hardiness for budbreak is greater in “B” than in “A” (SI Appendix Figs. S3A and S3B). It is important to note that greater cold hardiness means a more negative value, so the greater is in a magnitude sense. This being the case, the greater  $CH_{BB}$  leads to a shorter path length to budbreak. Therefore, budbreak is observed later in “A” compared to “B” (SI Appendix Fig. S3C), although the distribution of budbreak is similar.

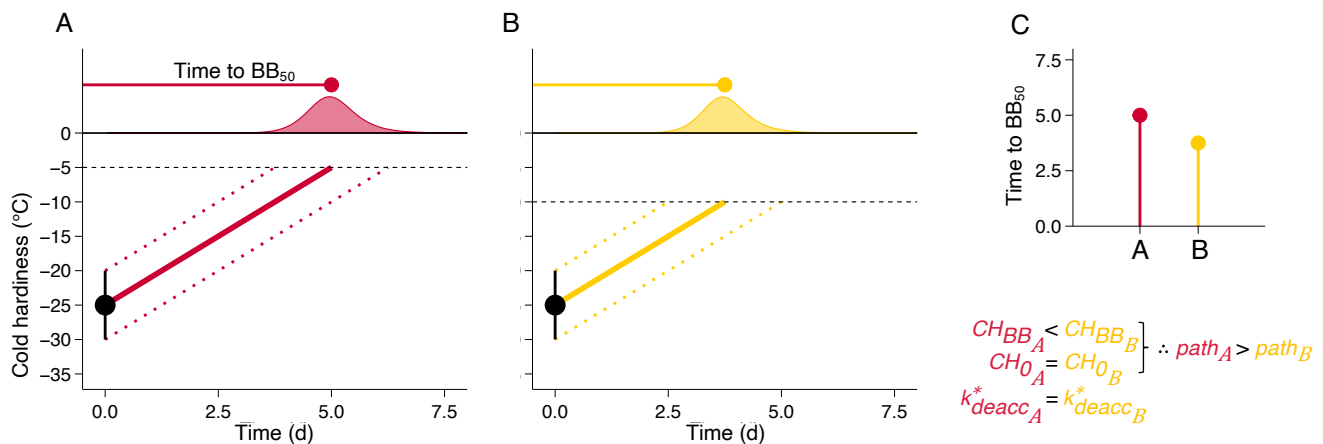

**Figure S3. Different cold hardiness at budbreak.** Without varying initial cold hardiness ( $CH_{0A} = CH_{0B}$ ) but having A be less cold hardy at budbreak than B ( $CH_{BB_A} < CH_{BB_B}$ ), the path length is greater in A ( $path_A > path_B$ ). Therefore, even as the rates of deacclimation are the same ( $k_{deacc_A}^* = k_{deacc_B}^*$ ), there is a perceived difference in time to 50% budbreak between the two (C).

### 3. Different initial cold hardiness, at different levels of chill accumulation, with constant rate of deacclimation and cold hardiness at budbreak

Here, two samples are presented at two different initial cold hardiness ( $CH_0$ ; where “A” is less cold hardy than “B”), while the cold hardiness at budbreak ( $CH_{BB}$ ) is kept constant (SI Appendix Figs. S4A and S4B). In addition the rate of deacclimation ( $k_{deacc}^*$ ) is kept constant for the same color curves, where colors represent different levels of chill accumulation. The more cold hardy sample thus takes longer to budbreak (SI Appendix Fig. S4C) at any chill accumulation. The more cold hardy sample thus takes longer to budbreak (SI Appendix Fig. S4C) at any chill accumulation than the less cold hardy sample. By looking at the time to budbreak (SI Appendix Fig. S4C), it appears as if “B” is decreasing the time to budbreak faster than “A” as chill accumulates. The distance in time to budbreak at any given point between “A” and “B” is the difference in cold hardiness between the samples divided by the rate of deacclimation, which explains the seemingly asymmetrical decrease in time to budbreak. However, when the rates of deacclimation are observed in relation to chill accumulation, no difference is observed between the two samples (SI Appendix Fig. S4D). This suggests that the physiological state in response to chilling is the same for both, but presumably lower temperatures experienced by “B” led to greater gain of cold hardiness in the field prior to hypothetical deacclimation assays compared to “A”.

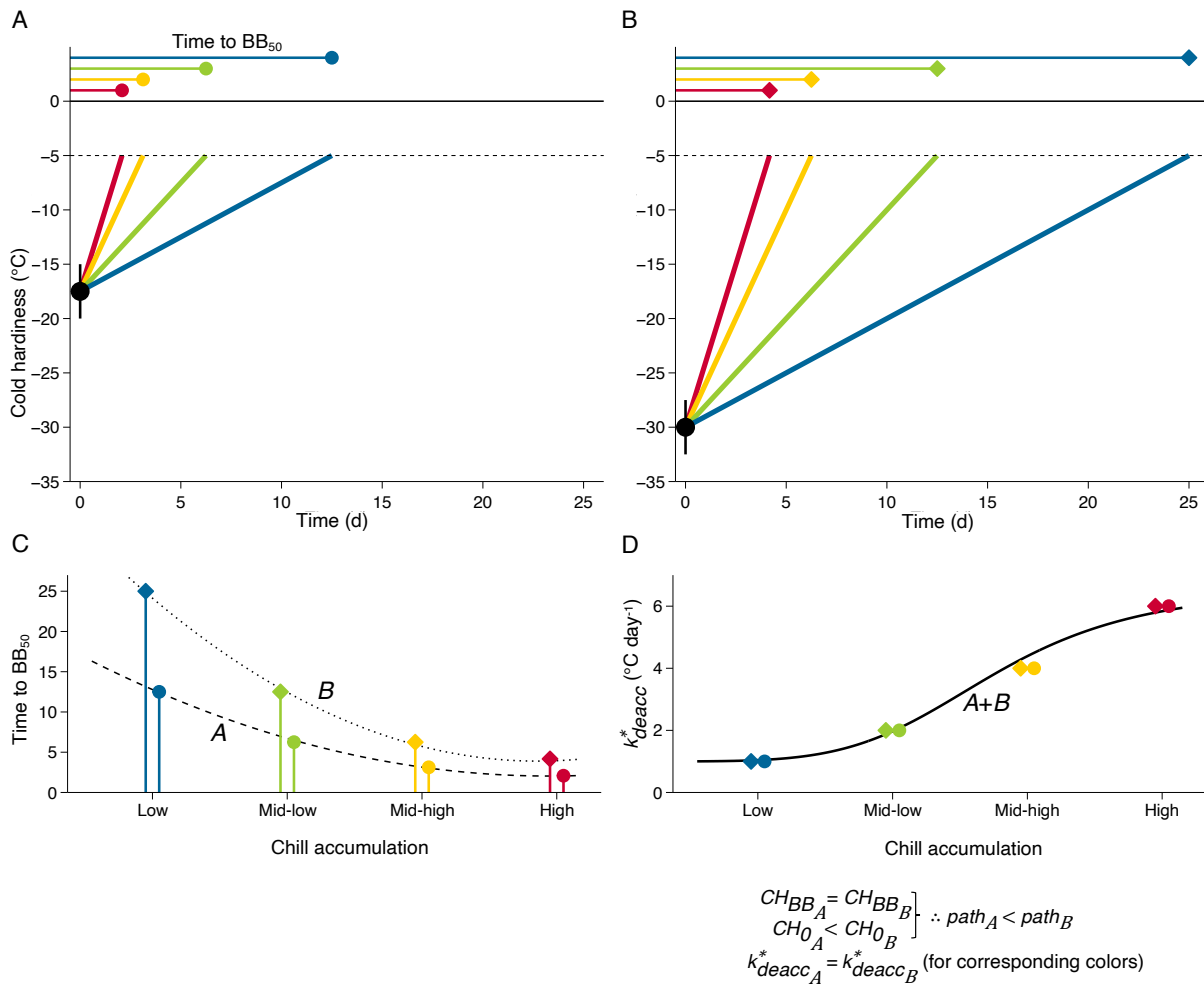

**Figure S4. Different initial cold hardiness, at different levels of chill accumulation.** As A has a lesser initial cold hardiness than B ( $CH_{0_A} < CH_{0_B}$ ), while having the same cold hardiness at budbreak ( $CH_{BB_A} = CH_{BB_B}$ ), the path length in A is shorter than in B ( $path_A < path_B$ ). The time to 50% budbreak (C) therefore differs for same levels of chill accumulation (corresponding colors). However, the effective rates of deacclimation ( $k_{deacc}^*$ ; D) are the same at the same levels of chill accumulation.



#### 4. Different rates of deacclimation, at different levels of chill accumulation, with constant initial cold hardiness and cold hardiness at budbreak

In this example, the initial cold hardiness and cold hardiness at budbreak are kept constant, but the effective rates of deacclimation ( $k_{deacc}^*$ ) at the same levels of chill accumulation (same colors) are greater in “A” compared to “B” (SI Appendix Figs. S5A and S5B in next page). Because of the lower rates, “B” shows a longer time to budbreak at same levels of chill accumulation (same colors) compared to “A” (SI Appendix Fig. S5C). If we look at the effective rates of deacclimation in response to chilling (SI Appendix Fig. S5D), “B” has lower rates of deacclimation at the same chill accumulations compared to “A”. However, if the rates are standardized based on the highest rate measured at high chill accumulation (shown in red in SI Appendix Fig. S5), we obtain the deacclimation potential at any point in chill accumulation (SI Appendix Fig. S5E). The curves describing deacclimation potential of “A” and “B” overlap, suggesting that again the physiological state of the two samples at these points in chill accumulation are the same, but differences in time to budbreak can still be observed based on the fact that one species (or genotype) has an inherently faster deacclimation rate than the other.

#### 5. Considerations

Here the examples in 1-4 describe changes in single parameters at a time to simplify the effects observed in time to budbreak. However, most parameters will differ for different species ( $CH_0$ ,  $CH_{BB}$ , and  $\max k_{deacc_T}$ ), and possibly for genotypes within species, though it appears that  $\Psi_{deacc}$  is very similar across distantly related species. This suggests that the regulation of dormancy in all plants is very conserved, and perhaps a simple process such that any changes in regulation lead to severe maladaptation. While  $CH_{BB}$  and  $\max k_{deacc_T}$  are species dependent (and expected to be independent from environment),  $CH_0$  will also vary within a species depending on the lowest temperatures experienced in any given year or region, or the time of collection within a dormant season. This will alter the path length, but at the same chilling accumulation, for the same species, the path length will still be linearly correlated to the time to budbreak (SI Appendix Fig. S6).

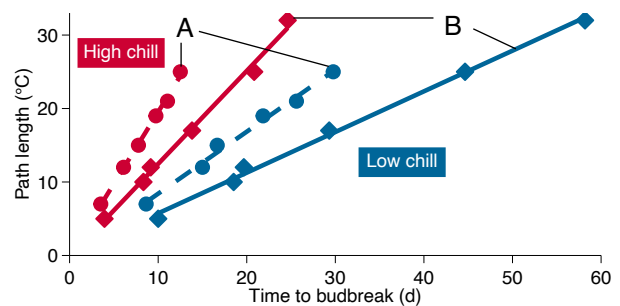

**Figure S6. Relationship between path length and time to budbreak as a function of chilling and genotype.** Multiple path lengths are shown for two species, A and B. The time to budbreak is then related to the path length within a given level of chill accumulation and species. The slope of the curves represent the effective rate of deacclimation ( $k_{deacc}^*$ ) for each species at each chilling accumulation.

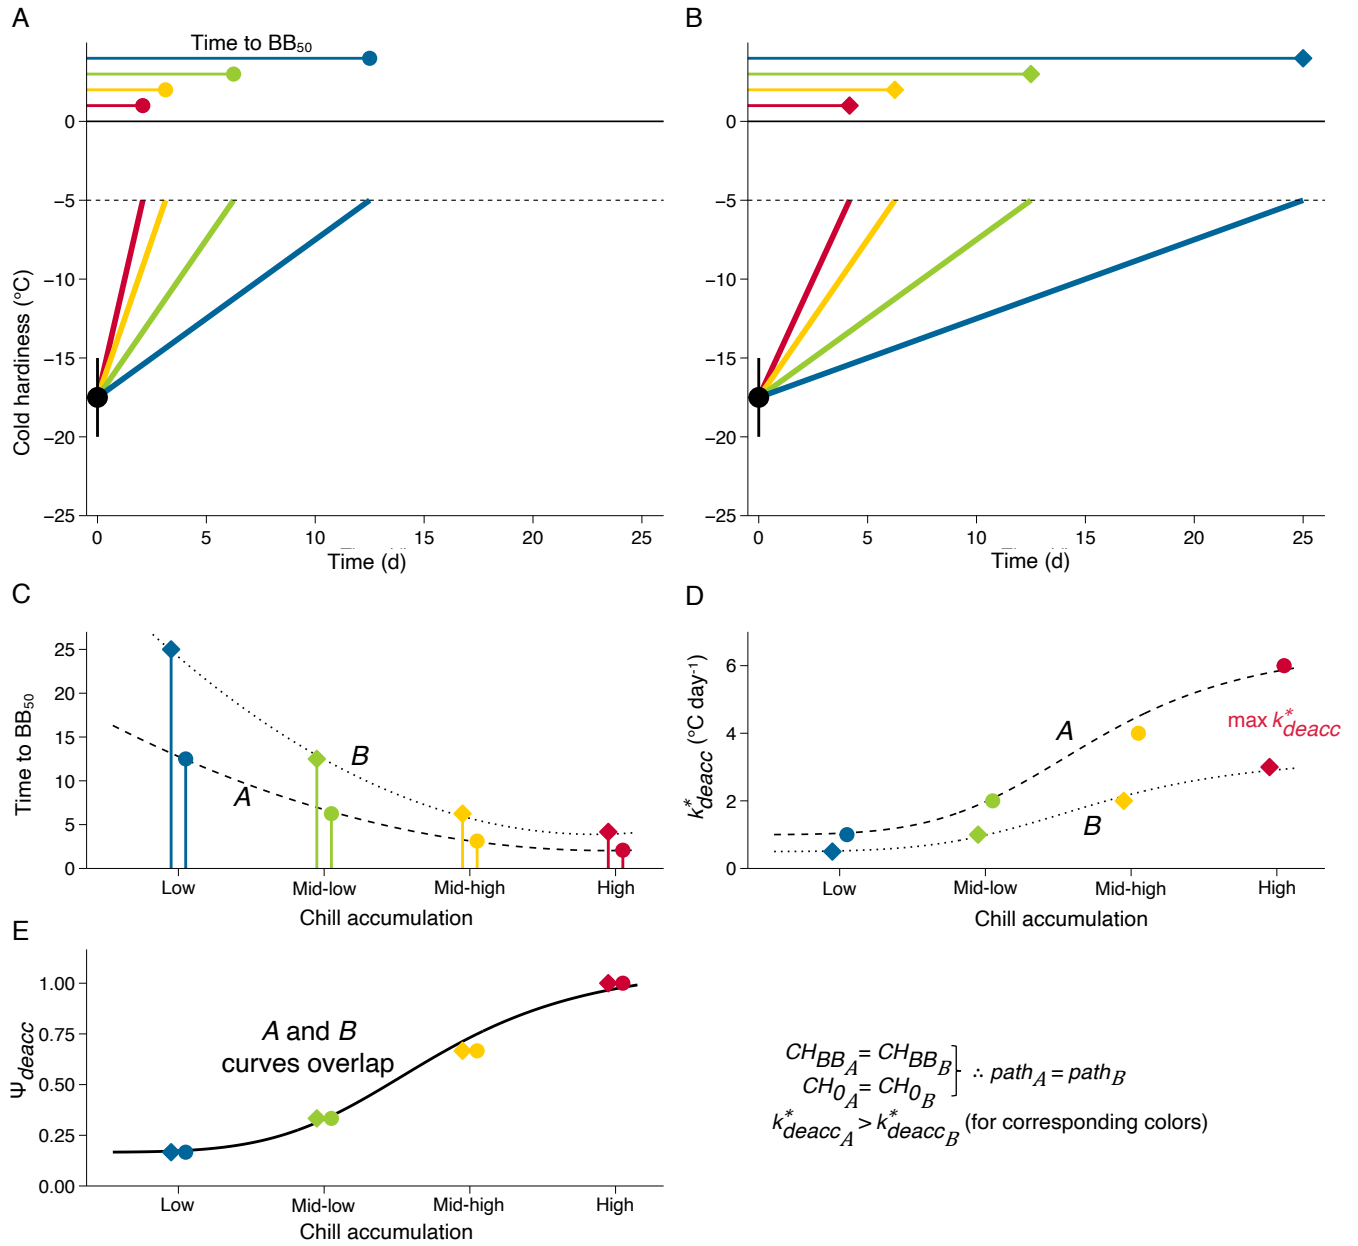

**Figure S5. Different rates of deacclimation, at different levels of chill accumulation.** A and B have the same initial cold hardiness and same cold hardiness at budbreak, and therefore the same path length ( $path_A = path_B$ ). The time to 50% budbreak (C) differs for same levels of chill accumulation (corresponding colors). This occurs as the effective rates of deacclimation ( $k_{deacc}^*$ ; D) are greater in A than in B at the same levels of chill accumulation. However, if the rates are standardized based on the maximum rate observed ( $max\ k_{deacc}^*$ ), thus generating the deacclimation potential ( $\Psi_{deacc}$ ; E), no difference is observed between A and B.

## Materials and Methods

**Study site and material collected.** All material was collected from plants from the Arnold Arboretum of Harvard University, located in Boston, MA, USA (42°17'57" N 71°07'22" W). The climate is a humid subtropical climate (Koeppen's Cfa), USDA Plant Hardiness Zone 6b [average annual extreme minimum temperature  $-17.8$  to  $-15$  °C (1)]. The 15 species collected were balsam fir (*Abies balsamea*), red maple (*Acer rubrum*), sugar maple (*Acer saccharum*), Eastern redbud (*Cercis canadensis*), flowering dogwood (*Cornus florida*), cornelian cherry (*Cornus mas*), American beech (*Fagus grandifolia*), forsythia (*Forsythia* × 'Meadowlark'), mountain laurel (*Kalmia latifolia*), Japanese larch (*Larix kaempferi*), dawn redwood (*Metasequoia glyptostroboides*), Norway spruce (*Picea abies*), apricot (*Prunus armeniaca* 'Mikado'), Canadian plum (*Prunus nigra*), and flame azalea (*Rhododendron calendulaceum*). Buds were collected from individual plants, except for: *Forsythia* × 'Meadowlark', for which multiple clones are available; and *Fagus grandifolia*, *Kalmia latifolia* and *Rhododendron calendulaceum*, which resulted in collections from multiple individuals at random located in the same mass due to large number of buds required ( $\geq 2000$  over two seasons; see **SI Appendix Table S1**). Plant IDs are available in **SI Appendix Table S1**, and further details can be found using the Arboretum Explorer website (<https://arboretum.harvard.edu/explorer/>).

**Effect of chill accumulation on budbreak.** Collections for budbreak assays occurred at weekly intervals in the field during two dormant seasons: from mid-September 2019 through mid-March 2020, and mid-September 2020 through end of February 2021 (**SI Appendix, Table S2**) and were processed on the same day of collection. For **budbreak** observations, 10 cuttings for each species were separated from the rest of material collected and placed in cups with water into a growth chamber at 22 °C, 16h day/8h night (forcing conditions). Observations occurred daily and budbreak was noted for individual cuttings when it occurred in any bud within a cutting with multiple buds (all species except *Cornus florida* and *Rhododendron calendulaceum*, for which cuttings with single buds were used). Time to budbreak is therefore the time (in days) elapsed between the date of collection and the day when budbreak occurred for each cutting in the growth chamber. Generally, in early collections this resulted in a single bud breaking in cuttings with multiple buds, whereas at later collections multiple buds would break synchronously within the same cutting – resulting in an underestimation in overall time to budbreak at low chill accumulations. Due to differences in bud morphology for each species, the budbreak phenotype was different and is further described in **SI Appendix Table S1**. In general, very early signs of budbreak were used (e.g., bud scales begin to separate and leaf tips are visible) rather than leafout. In species where both vegetative and reproductive budbreak was observed, vegetative budbreak comprised most of the early observations, whereas at later collections budbreak was mostly of reproductive buds.

**Effect of chill accumulation on deacclimation.** Cuttings for deacclimation were collected at the same times as those for budbreak and placed under the same forcing conditions (22 °C, 16h day/8h night). The field cold hardiness ( $CH_{field}$ ) was determined on the date of collection (prior to any deacclimation) and is also the initial cold hardiness ( $CH_0$ ) for each deacclimation assay (details on how cold hardiness was measured below). At semi-regular intervals, buds from the material under forcing conditions was used to evaluate cold hardiness at different points in time (i.e.,  $CH_1$ ,  $CH_2$ , ...  $CH_n$ ) to estimate rates of deacclimation. Cadence of sampling to determine rates of

deacclimation was based on equipment availability and expected deacclimation rates for each species. In general, a minimum number of five time points for cold hardiness measurements were sought such as to determine the two parameters of the linear relationship: species with higher deacclimation rates (e.g., *Forsythia* × 'Meadowlark' and *Prunus armeniaca*) were generally sampled at smaller intervals than those with lower deacclimation rates (e.g., *Picea abies*). However, at high chill accumulations, extreme rates of deacclimation in some species led to full deacclimation within a day, and therefore rates being based on only two time points [field (day 0) and day 1]. In the first season, assessments of field cold hardiness continued between mid-March 2020 and budbreak for each species, but lab access restrictions due to COVID-19 did not allow for deacclimation and budbreak assays. Deacclimation assay measurements for all species at 22 °C in every collection are available in **SI Appendix Figs. S19 to S48**.

**Effect of temperature on deacclimation.** Additional cuttings were collected one time per season in mid-winter [mid-February (82 chill portions) in the first, mid-January (54 chill portions) in the second season], from 13 of the 15 species in both years combined (all but *Acer saccharum* and *Metasequoia glyptostroboides*) to investigate the effect of different temperatures in deacclimation. The cuttings were placed in cups of water, and into growth chambers at seven different temperatures (2, 4, 7, 11, 15, 22 and 30 °C) to establish the relationship of deacclimation rate to temperature. With the exception of the 22 °C treatment (16h daylight), all other temperatures had 0h day/24h night as the photoperiod. Initial cold hardiness was determined on date of collection, and deacclimation measured in semi-regular intervals. Cold hardiness was generally assessed at smaller intervals in higher temperatures than lower temperatures. Measurements are available in **SI Appendix Figs. S49 and S50**.

**Cold hardiness measurements.** Cold hardiness of buds was measured using differential thermal analysis [DTA; (2)]. Buds were excised from stems and placed in thermoelectric modules (TEMs) in plates connected to a Keithley data logger (Tektronix, Beaverton, OR). The plates were placed in a programmable environmental chamber (Tenney, New Columbia, PA), in which temperature was decreased to –5 °C for 5h to promote initial non-lethal freezing events [high temperature exotherms (HTEs)] and then cooled at –6 °C hour<sup>-1</sup> to –55 °C. Due to COVID-19 related restrictions, starting 19 March 2020 until the end of the first season, the freezing was done in a common household freezer, and therefore the rate of cooling was not controlled and the minimum temperature reached was approximately –22 °C. Temperature and changes in voltage due to temperature differentials between the two surfaces of the TEMs are recorded, and therefore the release of heat due to freezing of water in buds results in voltage peaks. In DTA measurements, HTE peaks are large and occur at high below freezing temperatures as temperatures start ramping down within the assay (**SI Appendix Fig. S51**). These are non-lethal and usually understood to represent extracellular water freezing (3,2). In contrast, low temperature exotherms (LTEs) peaks are smaller than HTE peaks, occur at lower (more negative) temperatures, and are lethal freezing events of supercooled water within buds – thus representing their cold hardiness.. A maximum of 10 values for cold hardiness were recorded each time. Many species became less cold hardy in the field in mid-March 2020. While it is possible that the lower limit of detection (at approximately –22 °C in a household freezer) caused these errors, this shift also overlaps with considerable increase in air temperature and even full deacclimation and field budbreak of some species.

**Field budbreak.** Budbreak was observed in the field in the spring of 2020 (**SI Appendix Fig. S52**). Observations were done in quasi-daily intervals and the same phenotype for budbreak was used as that of controlled environment observations, noted as percent of total buds presenting the phenotype.

**On-site meteorological data.** Weather data were obtained from the Weld Hill meteorological station (HOBO RX3000 Station, Hobolink), available through the Arnold Arboretum website (arboretum.harvard.edu). The most distant plant (*Acer rubrum*) is located ~1,700 m from the weather station. Hourly air temperature was used to compute chilling accumulation at each collection point. Chilling accumulation was calculated as chill portions based on the Dynamic Model (4,5). Temperature and chilling accumulation for both years are shown in **SI Appendix Fig. S8**.

**Statistical analysis.** All analyses were conducted and figures produced using R [v. 4.0.4 (6)] within RStudio [v. 1.3.1093 (7)] and multiple packages therein (8-16). Deacclimation rates were determined using ordinary linear regressions for all deacclimation assays (weekly at 22 °C, and once per season at multiple temperatures), where cold hardiness is the dependent variable, and time in days is the independent variable:

$$y_i = \alpha + \beta x_i + \epsilon_i$$

where the intercept  $a$  represents the cold hardiness at collection ( $CH_{field}$  or  $CH_0$ ), and regression slope  $b$  is the effective deacclimation rate  $k_{deacc}^*$  in °C day<sup>-1</sup>. Because of detection limits at above ~-3 °C (**SI Appendix Fig. S18**), and the general trend of cold hardiness measurements to have a minimum cold hardiness of -5 °C (17), adjacent timepoints with similar cold hardiness measurements at warmer temperatures were manually removed to prevent reductions in the deacclimation rates due to this artifact. Datapoints with studentized residuals greater than 3 were removed (1.3% of measurements) and regressions were re-fit. Some gains in cold hardiness were observed in earlier collection points, which is expected to be a result of buds maturing within the warm temperature chamber.

To compare the **effect of chill accumulation on deacclimation** among species, the effective rates of deacclimation from weekly collections subjected to 22 °C ( $k_{deacc22^\circ C}^*$ ) were normalized within each genotype, resulting in the potential for deacclimation at each collection:

$$\Psi_{deacc_i} = \frac{\beta_i}{\sum_{k=0}^4 \beta_{(j-k)} / 4}$$

where  $b_i$  is the deacclimation rate at the  $i^{th}$  collection, and  $b_{(j)}$  is the  $j^{th}$  highest deacclimation rate, such that the rate is normalized to the average of the highest 4 measured deacclimation rates. The average of the 4 highest deacclimation rates is also presented as  $\max k_{deacc22^\circ C}$ . A three-parameter log-logistic function, with upper limit 1, was fit to these data for each species:

$$\Psi_{deacc_i}(chill) = d + (1 - d) / (1 + e^{[b(\ln(chill_i) - \ln(c))]} )$$

where the potential for deacclimation at the  $i^{th}$  collection is a function of chilling accumulation at the  $i^{th}$  collection. Three estimates are thus obtained:  $d$  is the minimum deacclimation observed at all times (analogous to an intercept);  $b$  is the slope associated with the log-logistic curve, where negative values indicate increases in  $\Psi_{deacc}$  as chill accumulation increases, and greater magnitudes indicate a higher slope; and  $c$  is the inflection point of the log-logistic curve and therefore a chilling requirement-analogous measurement as the chilling required to reach 50% of the maximum deacclimation rate.

To establish chilling requirements based on the **effect of chill accumulation of budbreak**, time to 50% budbreak at 22 °C and a threshold of 15 days was used. The chilling requirement was calculated as the mean chilling accumulation of the four consecutive points where the average time to budbreak was closest to 15 days, using both years of data combined. For species in which the 15 days threshold was not crossed, the last four timepoints were used.

The maximum cold hardiness ( $CH_{max}$ ) of each species was determined as the average of measurements from the four dates where the cold hardiness for each genotype were maximum. To estimate the cold hardiness at budbreak ( $CH_{BB}$ ), the field cold hardiness dataset was merged with the budbreak dataset, such that each cold hardiness measurements had  $n$  budbreak times associated with it –  $n$  being the number of buds that broke within a collection. For this, only data after >25 chill portions had accumulated were used to select informative points where deacclimation rates were high enough and budbreak occurred with more regularity. Each cold hardiness point was then predicted to lose cold hardiness at the measured deacclimation rate until each time of budbreak (see **SI Appendix Figs. S1**). The average of all measurements then provided an estimated parameter for cold hardiness at budbreak. Because *Rhododendron calendulaceum* had very poor budbreak in controlled environment, a determined cold hardiness at budbreak was used for this species based on literature [ $CH_{BB} = -5$  °C (18,19)].

The **effect of temperature on deacclimation** was evaluated by fitting a third-degree polynomial of determined rates in response to temperature. Third-degree polynomials were used to acknowledge the known effects of fast increases in rate at low temperatures and lower increases in rate at high temperatures for the nine species in which different temperatures were tested. To remove effects from lower chill accumulation ( $\Psi_{deacc} < 1$ ) in the collections for the effect of temperatures, the slopes from each temperature ( $k_{deacc_T}^*$ ) for each species were corrected based on the ratio of the rate measured at 22 °C at the temperature collection and  $\max k_{deacc_{22\text{ °C}}}$ , thus resulting in  $\max k_{deacc_T}$  for each temperature. Corrected rates were then used to calculate the function that describes  $k_{deacc}$  for each species:

$$\max k_{deacc_T} = \begin{cases} 0 & \text{if } T \leq 0 \text{ °C} \\ 0 + \beta_1 T + \beta_2 T^2 + \beta_3 T^3 & \text{if } T > 0 \text{ °C} \end{cases}$$

where T is the air temperature. For those genotypes in which the response to different temperatures was not estimated, a linear response was used with a 0 intercept; and  $\max k_{deacc_{22^{\circ}\text{C}}}$  divided by 22 as  $\beta_1$ .

Although there were no acclimation experiments in this study, a rate of acclimation ( $k_{acc}$ ) was required to evaluate time to budbreak in relation to field cold hardiness. Therefore, a single linear rate of acclimation used was for all species:

$$k_{acc} = \begin{cases} 0 & \text{if } T \geq 0^{\circ}\text{C} \\ 0.3 \times T & \text{if } T < 0^{\circ}\text{C and } (CH_{field} + 0.3 \times T) > CH_{max} \\ CH_{field} - CH_{max} & \text{if } T < 0^{\circ}\text{C and } (CH_{field} + 0.3 \times T) < CH_{max} \end{cases}$$

where acclimation does not occur at above 0 °C, and is a linear response to temperature otherwise. A threshold was imposed such that the predicted cold hardiness would not surpass maximum measured cold hardiness, and therefore deacclimation starts towards budbreak when the deacclimation overcomes any acclimation that may occur within a day. The estimate of 0.3 was used based on four iterations (0.0, 0.1, 0.2, 0.3) for acclimation rates of similar magnitude to those in the literature (20,21), and the equations used are a numerical way to overcome unknowns in the acclimation process. The four manual iterations of  $k_{acc}$  were the only optimization performed in the model, and the same rate was used for all species.

Estimates, sample sizes (n), and appropriate fitness statistics (e.g.,  $r^2$ s and  $P$ -values) for each portion of the data analyses are available in **SI Appendix Tables S3–S5**.

## Supplementary Information References

1. M. S. Dosmann, The history of minimum temperatures at the Arnold Arboretum: variation in time and space. *Arnoldia* **72**, 2–11 (2015).
2. L. J. Mills, J. C. Ferguson, M. Keller, Cold-hardiness evaluation of grapevine buds and cane tissues. *Am. J. Enol. Vitic.* **57**, 194–200 (2006).
3. G. Neuner, K. Monitzer, D. Kaplening, J. Ingruber, Frost survival mechanism of vegetative buds in temperate trees: deep supercooling and extraorgan freezing vs. ice tolerance. *Front. Plant Sci.* **10**, 537 (2019).
4. S. Fishman, A. Erez, G. A. Couvillon, The temperature dependence of dormancy breaking in plants: mathematical analysis of a two-step model involving a cooperative transition. *J. Theo. Biol.* **124**, 473–483 (1987).
5. S. Fishman, A. Erez, G. A. Couvillon, The temperature-dependence of dormancy breaking in plants – computer-simulation of processes studied under controlled temperatures. *J. Theo. Biol.* **126**, 309–321 (1987).
6. R Core Team. R: A language and environment for statistical computing. R Foundation for Statistical Computing, Vienna, Austria (2020).
7. RStudio Team. RStudio: Integrated Development Environment for R. RStudio, PBC, Boston, MA (2020).
8. T. L. Pedersen, patchwork: the composer of plots. R package version 1.1.0. <https://CRAN.R-project.org/package=patchwork> (2020).
9. H. Wickham, ggplot2: elegant graphics for data analysis. Springer-Verlag New York (2016).
10. C. Ritz, F. Baty, J. C. Streibig, D. Gerhard, Dose-Response Analysis Using R. *PLOS ONE*, **10**, e0146021 (2015).
11. E. Luedeling, chillR: Statistical Methods for Phenology Analysis in Temperate Fruit Trees. R package version 0.70.24. <https://CRAN.R-project.org/package=chillR> (2020).
12. G. Golemund, H. Wickham, Dates and times made easy with lubridate. *J. Stat. Softw.* **40**, 1–25 (2011).
13. J. Fox, S. Weisberg, An R companion to applied regression. Third Edition. Thousand Oaks CA: Sage (2019).
14. W. N. Venables, B. D. Ripley, Modern applied statistics with S. Fourth Edition. Springer, New York. ISBN 0-387-95457-0 (2002).
15. F. Mendiburu, agricolae: Statistical Procedures for Agricultural Research. R package version 1.3-3 (2020).
16. C. Sievert, Interactive Web-Based Data Visualization with R, plotly, and shiny. Chapman and Hall/CRC Florida (2020).
17. A. Lenz, G. Hoch, Y. Vitasse, C. Körner, European deciduous trees exhibit similar safety margins against damage by spring freeze events along elevational gradients. *New Phyt.* **200**, 1166–1175 (2013).
18. S. R. Kalberer, N. Leyva-Estrada, S. L. Krebs, R. Arora, Frost dehardening and rehardening of floral buds of deciduous azaleas are influenced by genotypic biogeography. *Env. Exp. Bot.* **59**, 264–275 (2007).
19. G. Neuner, D. Ambach, O. Buchner, Readiness to frost harden during the dehardening period measured *in situ* in leaves of *Rhododendron ferrugineum* L. at the alpine timberline. *Flora* **194**, 289–296.



20. J. C. Ferguson, J. M. Tarara, L. J. Mills, G. G. Grove, M. Keller, Dynamic thermal time model of cold hardiness for dormant grapevine buds. *Ann. Bot.* **107**, 389–396 (2011).
21. J. C. Ferguson, M. M. Moyer, L. J. Mills, G. Hoogenboom, M. Keller, Modeling dormant bud cold hardiness and budbreak in twenty three *Vitis* genotypes reveals variation by region of origin. *Am. J. Enol. Vitic.* **65**, 59–71 (2014).

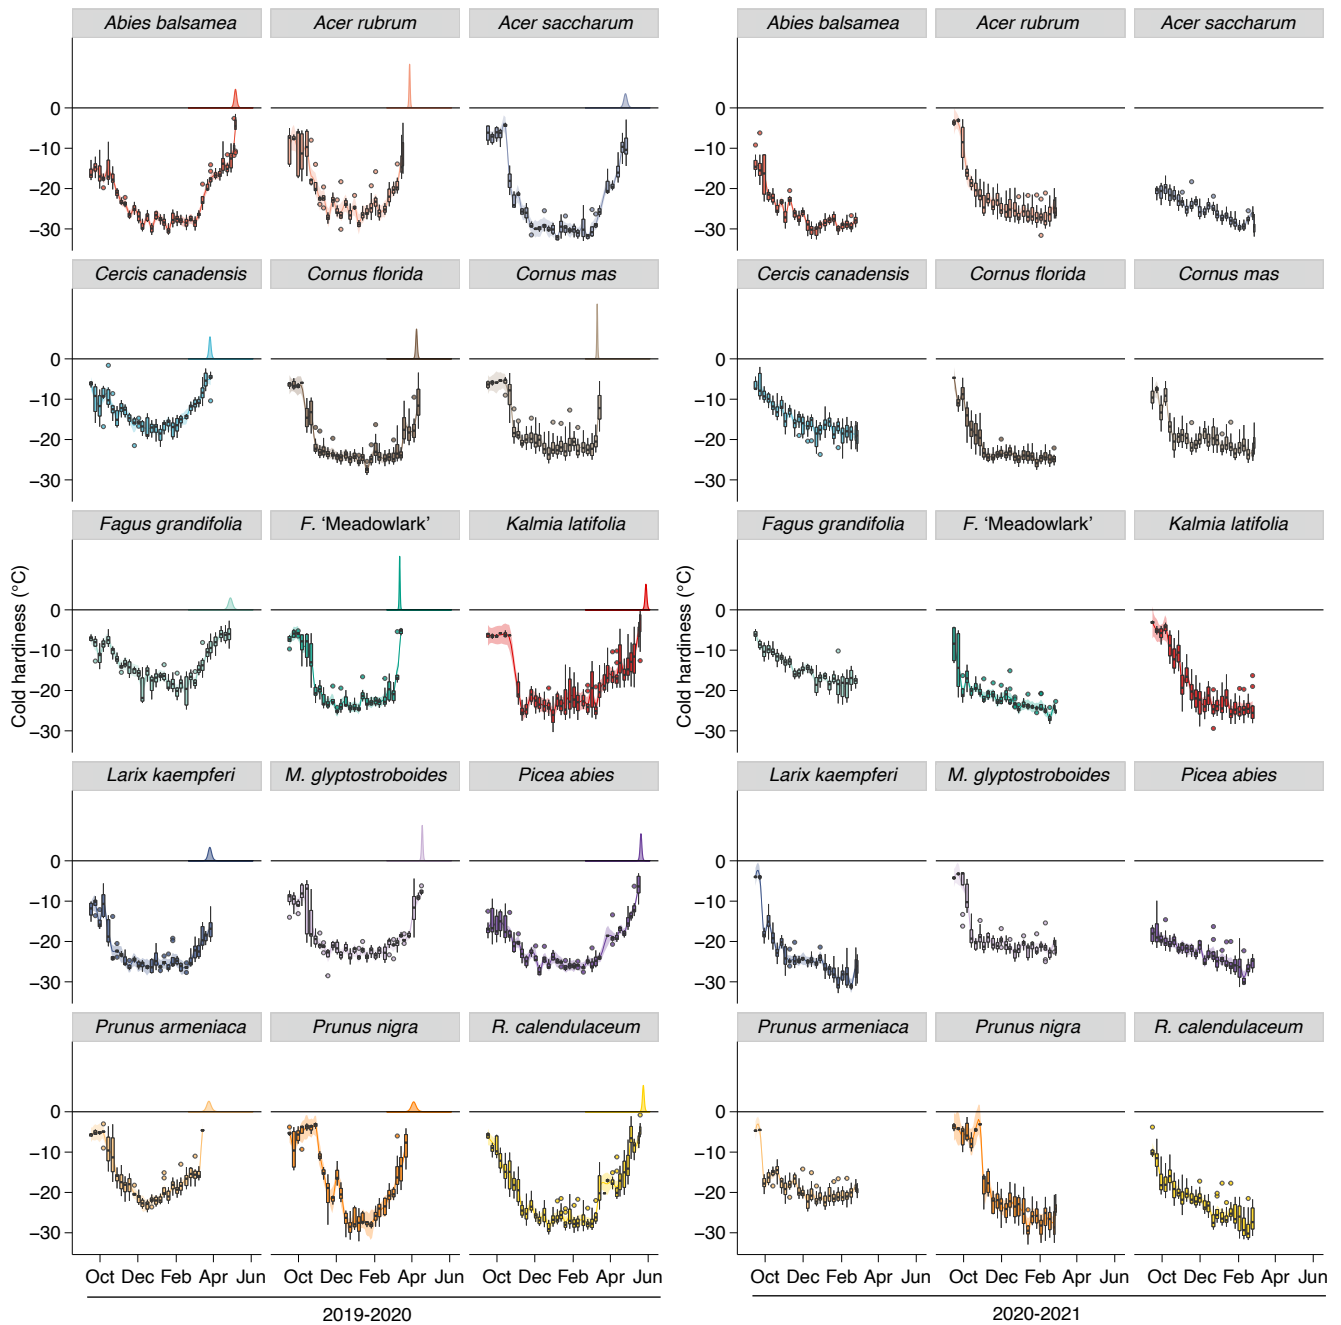

**Figure S7. Field cold hardiness.** Cold hardiness of buds was measured weekly throughout two dormant seasons for 15 species. These represents  $CH_0$  for each weekly deacclimation assay. Density curves above 0 °C line in 2019-2020 represent observed budbreak in the field. Main figure equivalent is **Fig. 3**.

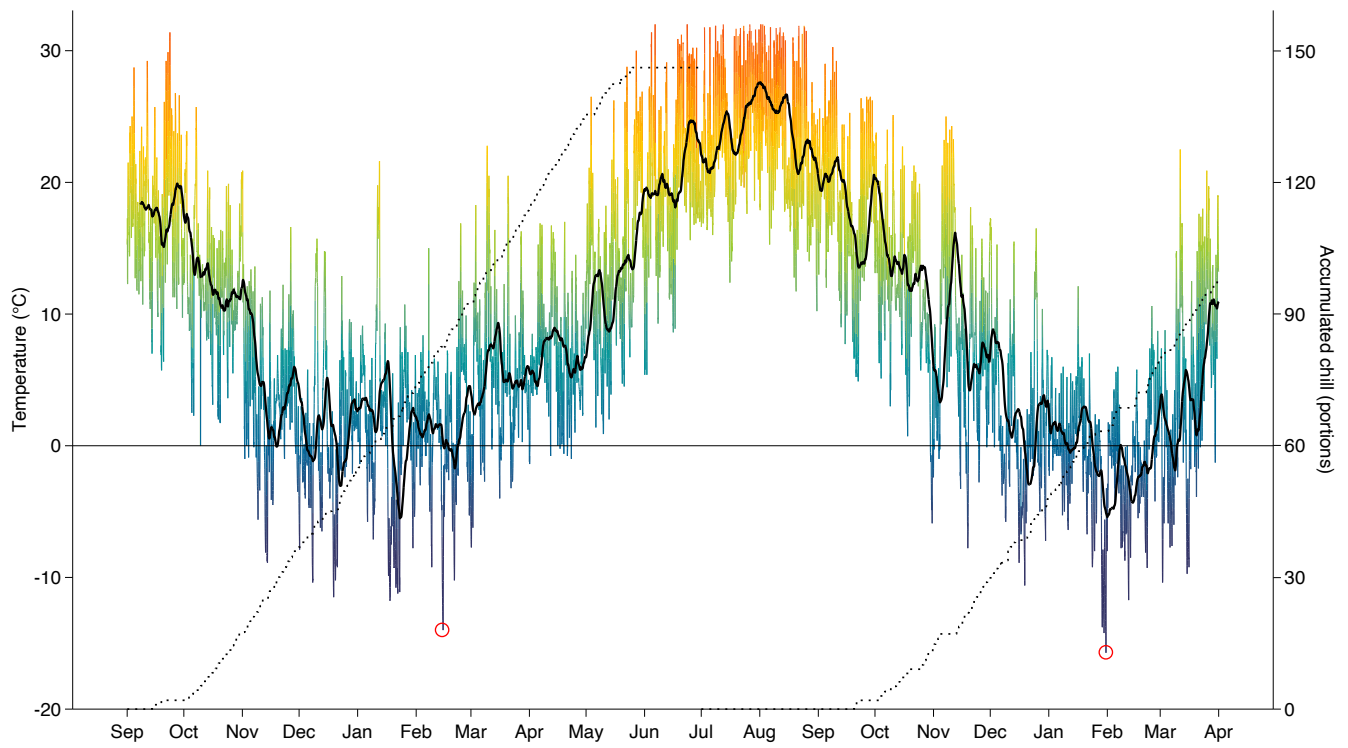

**Figure S8. Temperature conditions in the field.** Observed hourly temperatures (colored line, left vertical axis), seven days average temperature (solid black line) and chill accumulation (dotted black line, right vertical axis) between 1 September 2019 and 31 March 2021 at the Arnold Arboretum of Harvard University, in Boston, MA, USA. Red circles show minimum temperature observed in each season ( $-14.0\text{ }^{\circ}\text{C}$  in 2020,  $-15.7\text{ }^{\circ}\text{C}$  in 2021).

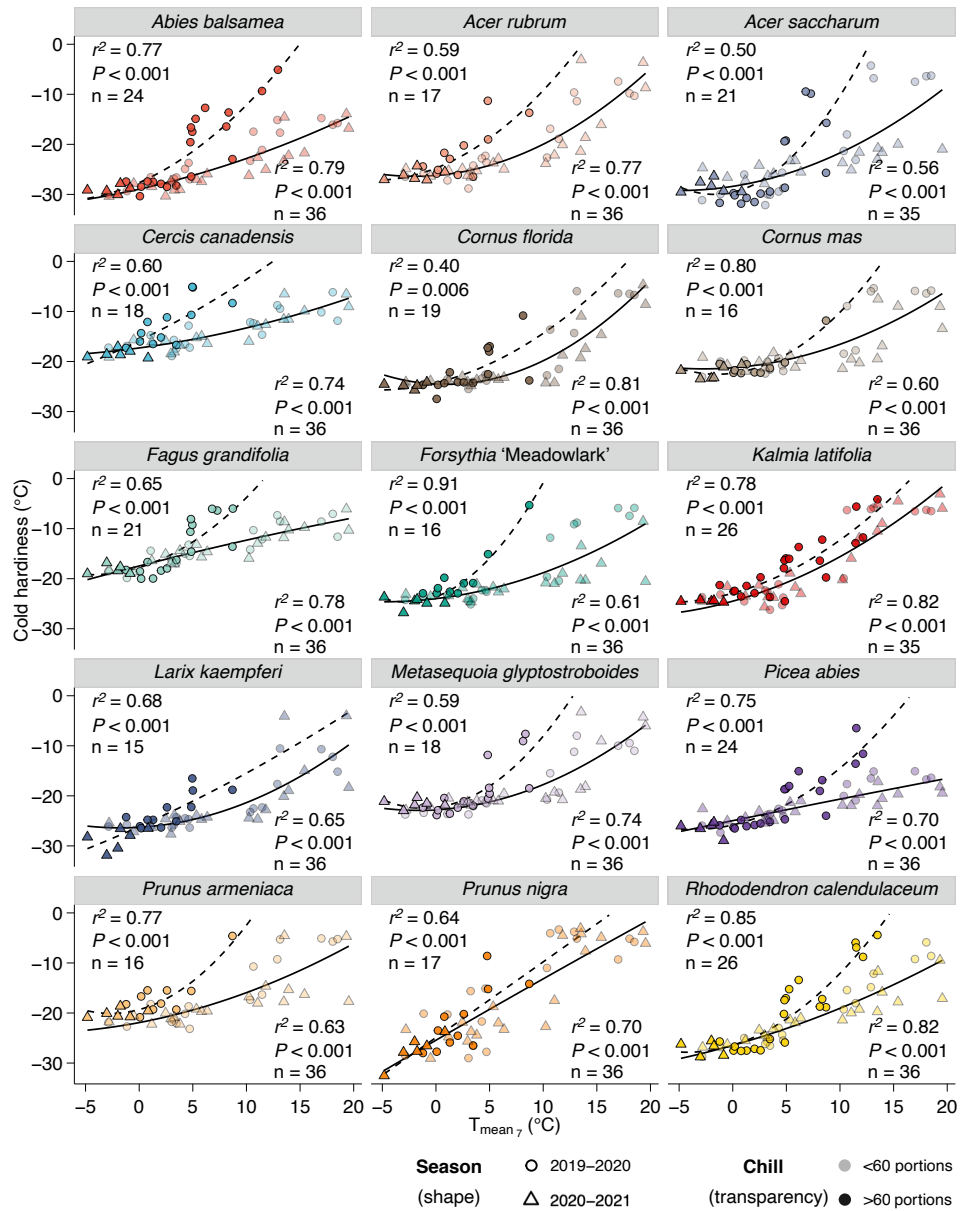

**Figure S9. Relationship between weekly average temperature and cold hardiness.** Second degree polynomials were fit to cold hardiness data from two seasons separated between early winter (<60 chill portions accumulated, transparent color points, full line, bottom right statistics) and late winter (>60 chill portions accumulated, vivid color points, dashed line, upper left statistics) for each species using the average temperature for the seven days preceding collection.

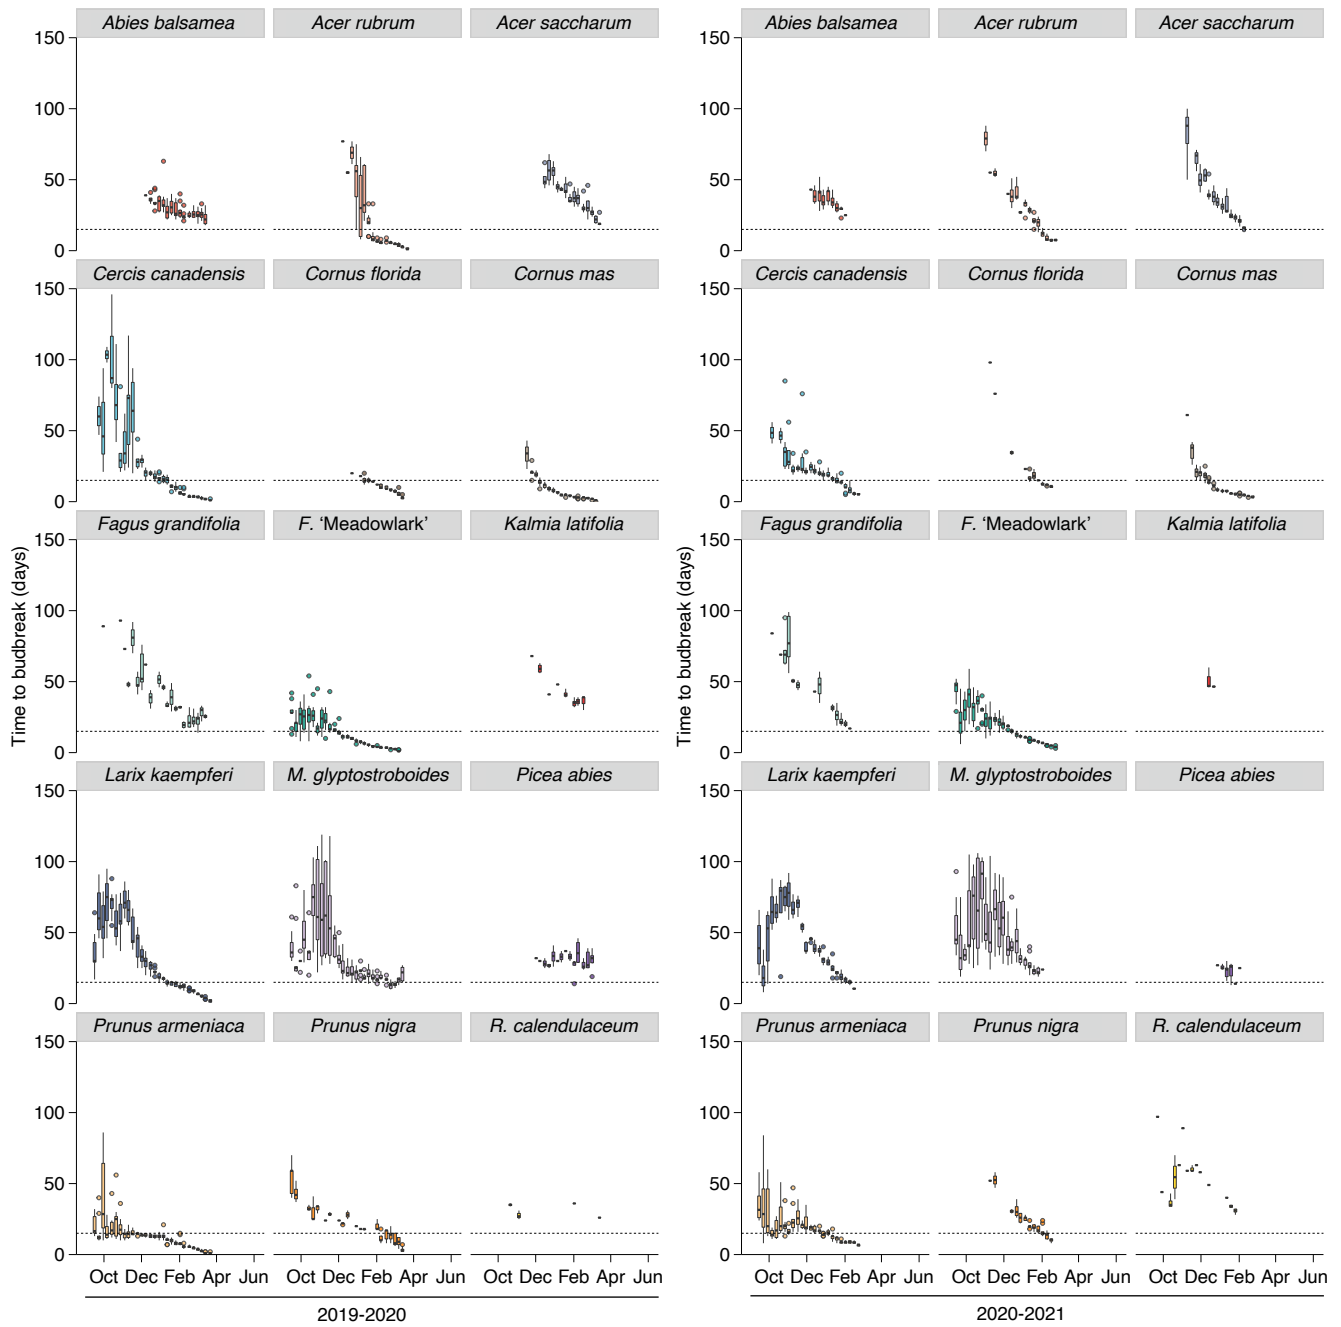

**Figure S10. Budbreak in controlled environment.** Time to budbreak in forcing conditions in controlled environment of buds collected weekly throughout two dormant seasons for 15 species. Main figure equivalent is **Fig. 3**.

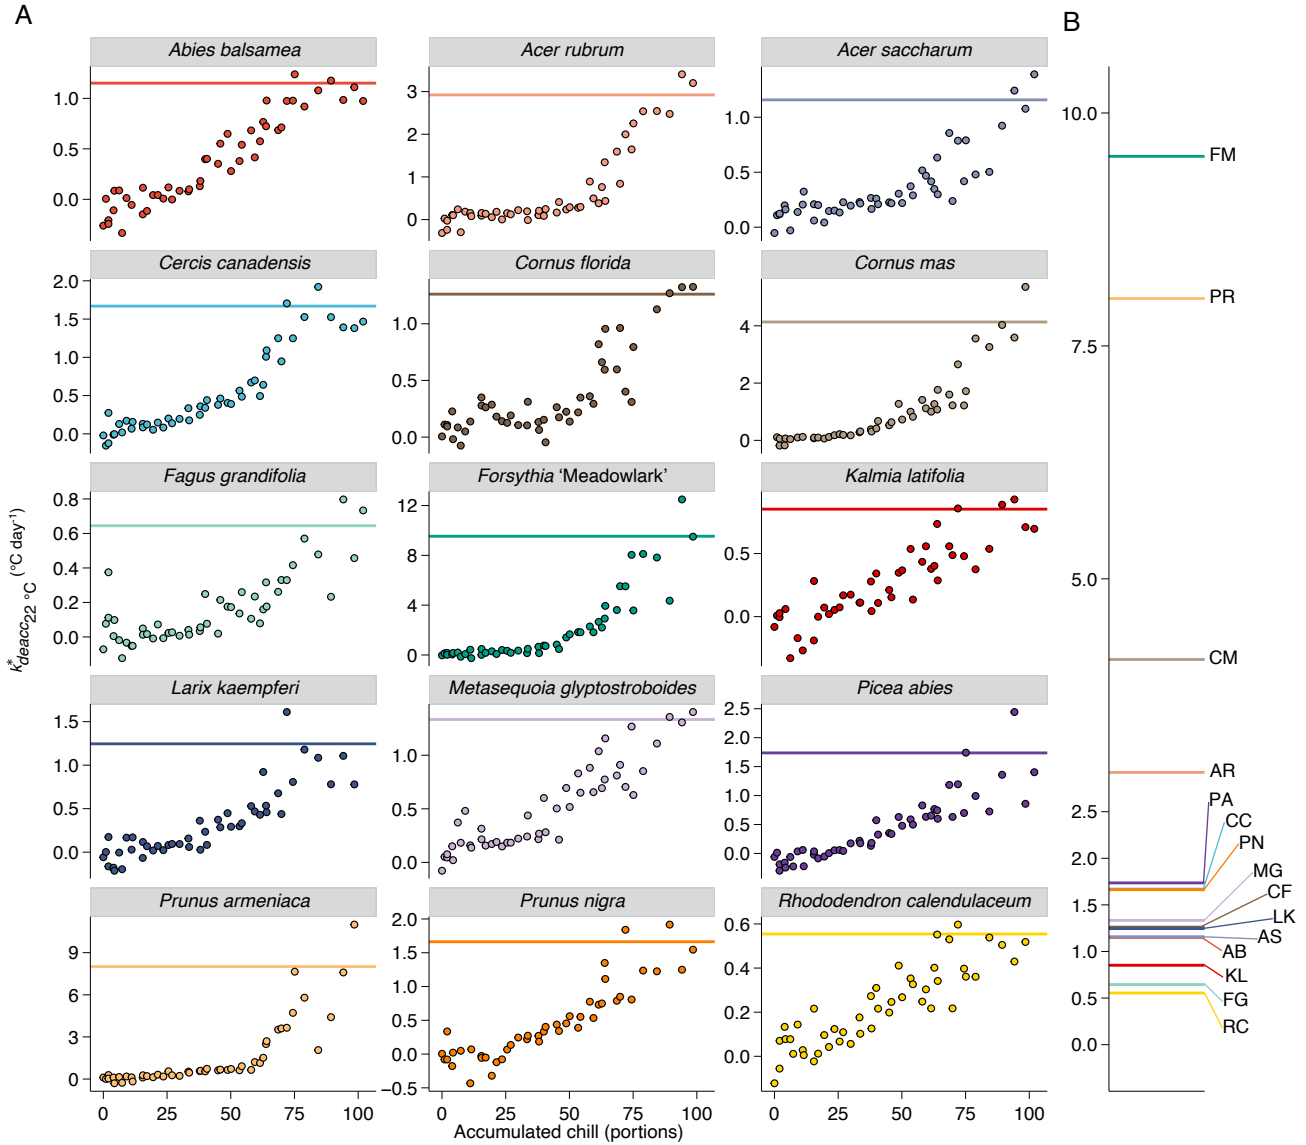

**Figure S11. Deacclimation rates response to chill accumulation.** Deacclimation rates obtained from weekly deacclimation assays at 22 °C for each species during two dormant seasons (A). Horizontal line shows maximum rate of deacclimation at 22 °C as the average of the four highest deacclimation rates in each panel. Note different y axes for each species. In the right side (B), maximum rates of all species are plotted together for magnitude comparisons. AB – *Abies balsamea*; AR – *Acer rubrum*; AS – *Acer saccharum*; CC – *Cercis canadensis*; CF – *Cornus florida*; CM – *Cornus mas*; FG – *Fagus grandifolia*; FM – *Forsythia 'Meadowlark'*; KL – *Kalmia latifolia*; LK – *Larix kaempferi*; MG – *Metasequoia glyptostroboides*; PA – *Picea abies*; PR – *Prunus armeniaca*; PN – *Prunus nigra*; RC – *Rhododendron calendulaceum*. Main figure equivalent is Fig. 5A.

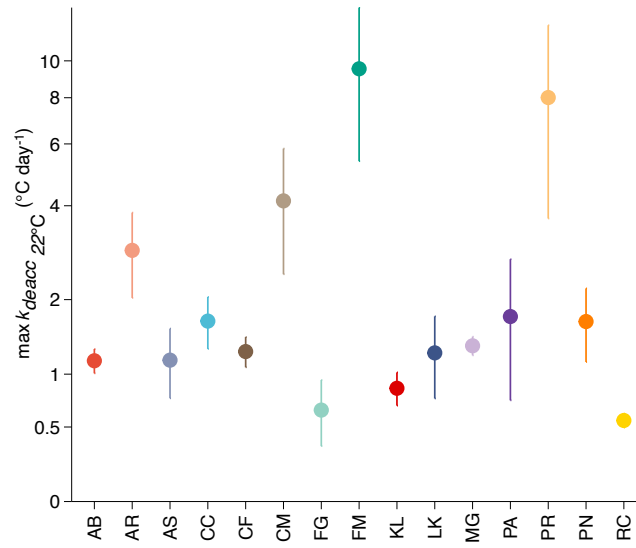

**Figure S12. Maximum deacclimation rates for each species.** Maximum deacclimation rates measured from weekly deacclimation assays at 22 °C for each species during two dormant seasons (log scale). Error bars indicate standard error. AB – *Abies balsamea*; AR – *Acer rubrum*; AS – *Acer saccharum*; CC – *Cercis canadensis*; CF – *Cornus florida*; CM – *Cornus mas*; FG – *Fagus grandifolia*; FM – *Forsythia* ‘Meadowlark’; KL – *Kalmia latifolia*; LK – *Larix kaempferi*; MG – *Metasequoia glyptostroboides*; PA – *Picea abies*; PR – *Prunus armeniaca*; PN – *Prunus nigra*; RC – *Rhododendron calendulaceum*.

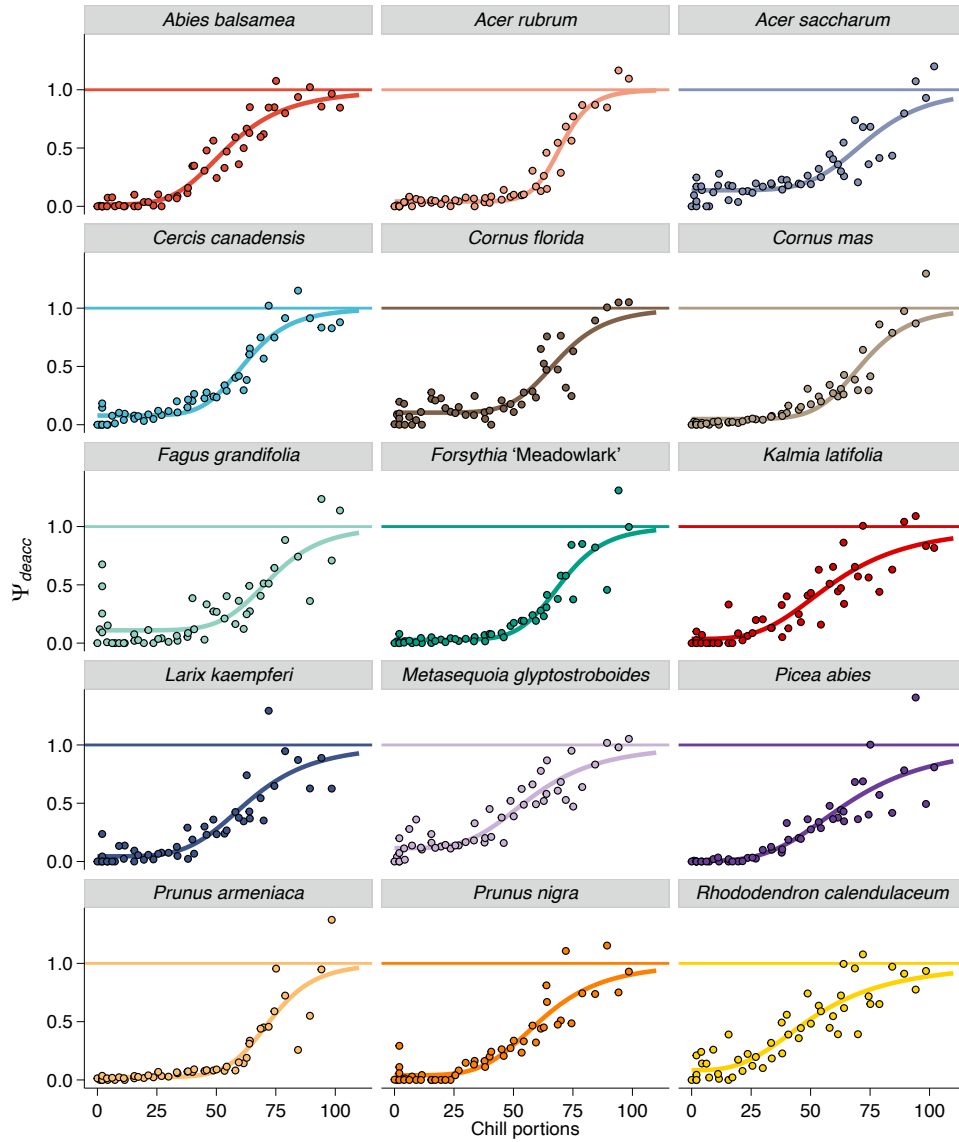

**Figure S13. Normalized deacclimation rates response to chill accumulation.** Deacclimation rates standardized to maximum deacclimation rate at 22 °C for each species produce values of deacclimation potential varying between 0 and 1. Main figure equivalent is **Fig. 5B**.



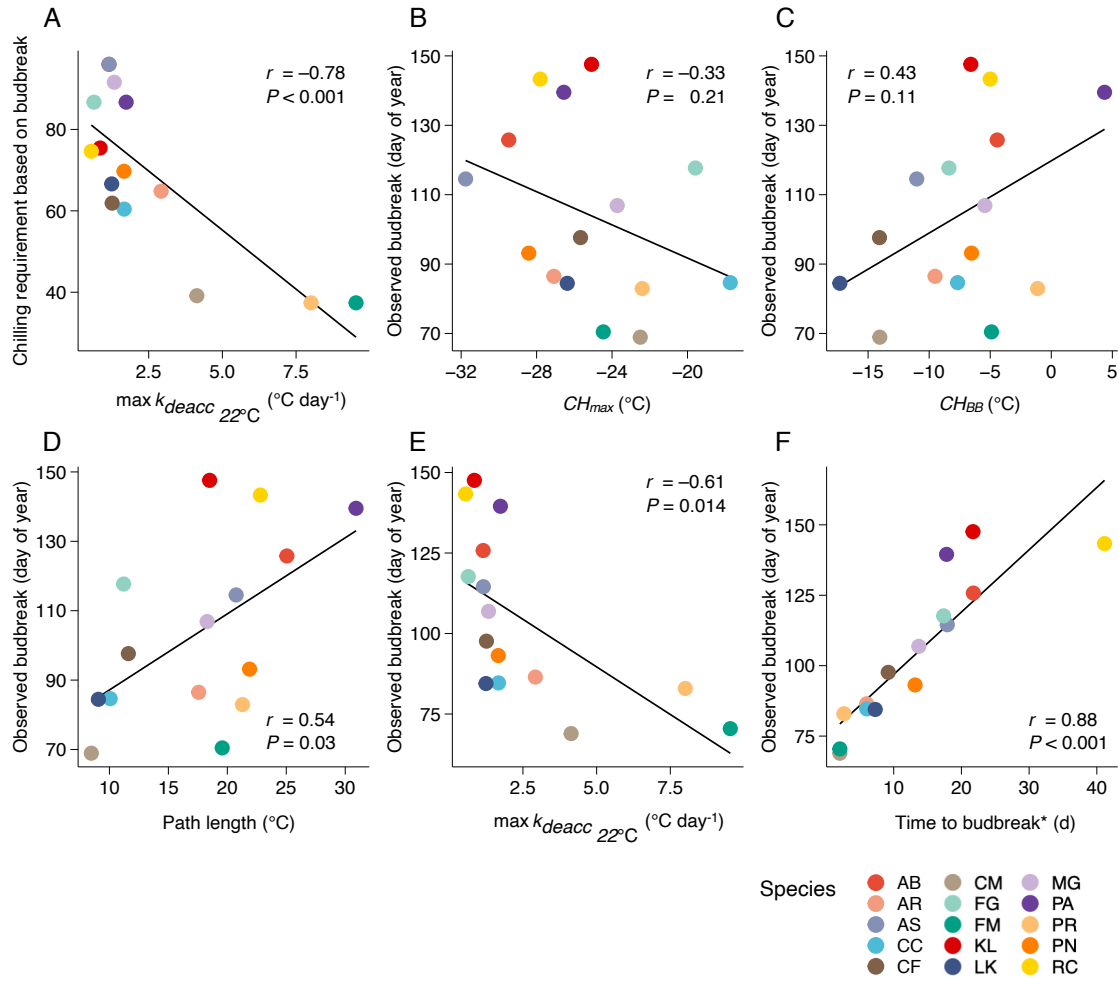

**Figure S14. Correlations between several variables studied.** (A) Chilling requirement based on budbreak is negative correlated with the maximum rate of deacclimation at 22 °C ( $\max k_{deacc\ 22^{\circ}\text{C}}$ ). Observed budbreak in the field is poorly or moderately correlated with  $CH_{max}$  (B),  $CH_{BB}$  (C), path length ( $|CH_{max} - CH_{BB}|$ ; D), and  $\max k_{deacc\ 22^{\circ}\text{C}}$  (E). However, when an artificial time to budbreak\* is calculated based on Eq. 1 (path length/  $\max k_{deacc\ 22^{\circ}\text{C}}$ ), a strong correlation exists between that and time of field budbreak (F). AB – *Abies balsamea*; AR – *Acer rubrum*; AS – *Acer saccharum*; CC – *Cercis canadensis*; CF – *Cornus florida*; CM – *Cornus mas*; FG – *Fagus grandifolia*; FM – *Forsythia* 'Meadowlark'; KL – *Kalmia latifolia*; LK – *Larix kaempferi*; MG – *Metasequoia glyptostroboides*; PA – *Picea abies*; PR – *Prunus armeniaca*; PN – *Prunus nigra*; RC – *Rhododendron calendulaceum*.

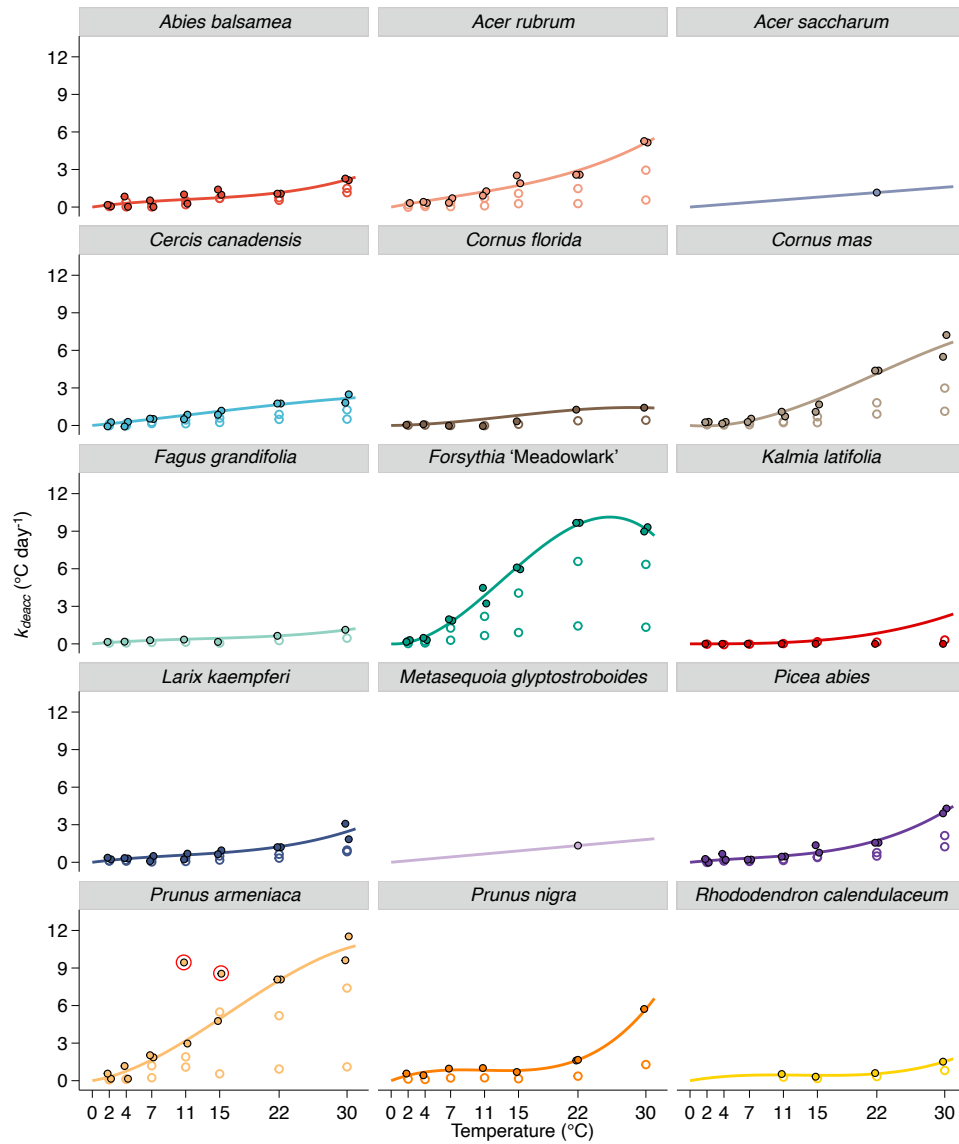

**Figure S15. Deacclimation response to temperature.** Temperature responses for individual species [open circles show measured rates, closed circles shows corrected rates based on  $\max k_{deacc_{22^\circ\text{C}}}$ ]. Line shows predicted model for  $k_{deacc}$  using a third-degree polynomial with intercept = 0. For species which did not have deacclimation measured at temperatures other than 22 °C (*A. saccharum* and *M. glyptostroboides*), temperature response was modeled as a linear regression with intercept = 0 using  $\max k_{deacc_{22^\circ\text{C}}}$ . Red circles in *P. armeniaca* show rates removed from model as outliers. Main figure equivalent is **Fig. 7**.

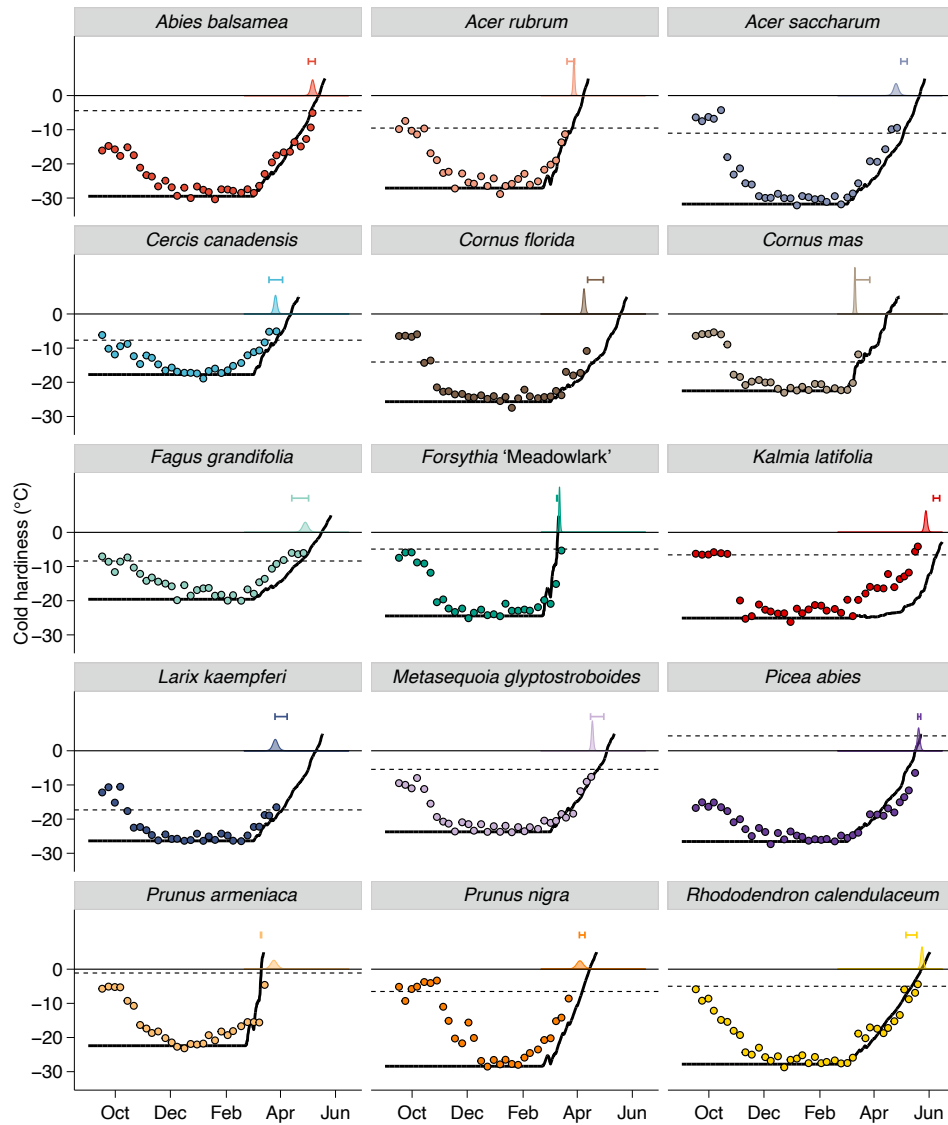

**Figure S16. Predicting budbreak based on cold hardiness dynamics.** Average cold hardiness [circles, no error for simplicity (see **SI Appendix Fig. S8**)] during the entire season are shown, as well as field budbreak (density plots at 0 °C). Predicted cold hardiness started at maximum cold hardiness ( $CH_{max}$ ) and runs until +5 °C based on species-specific deacclimation parameters (solid line). Budbreak is predicted to occur when prediction line crosses the cold hardiness at budbreak ( $CH_{BB}$ ; dashed lines) for each species. The interval is produced by adding error of  $\pm 2.5$  °C to  $CH_{max}$ . Main figure equivalent is shown as inset in **Fig. 9**.

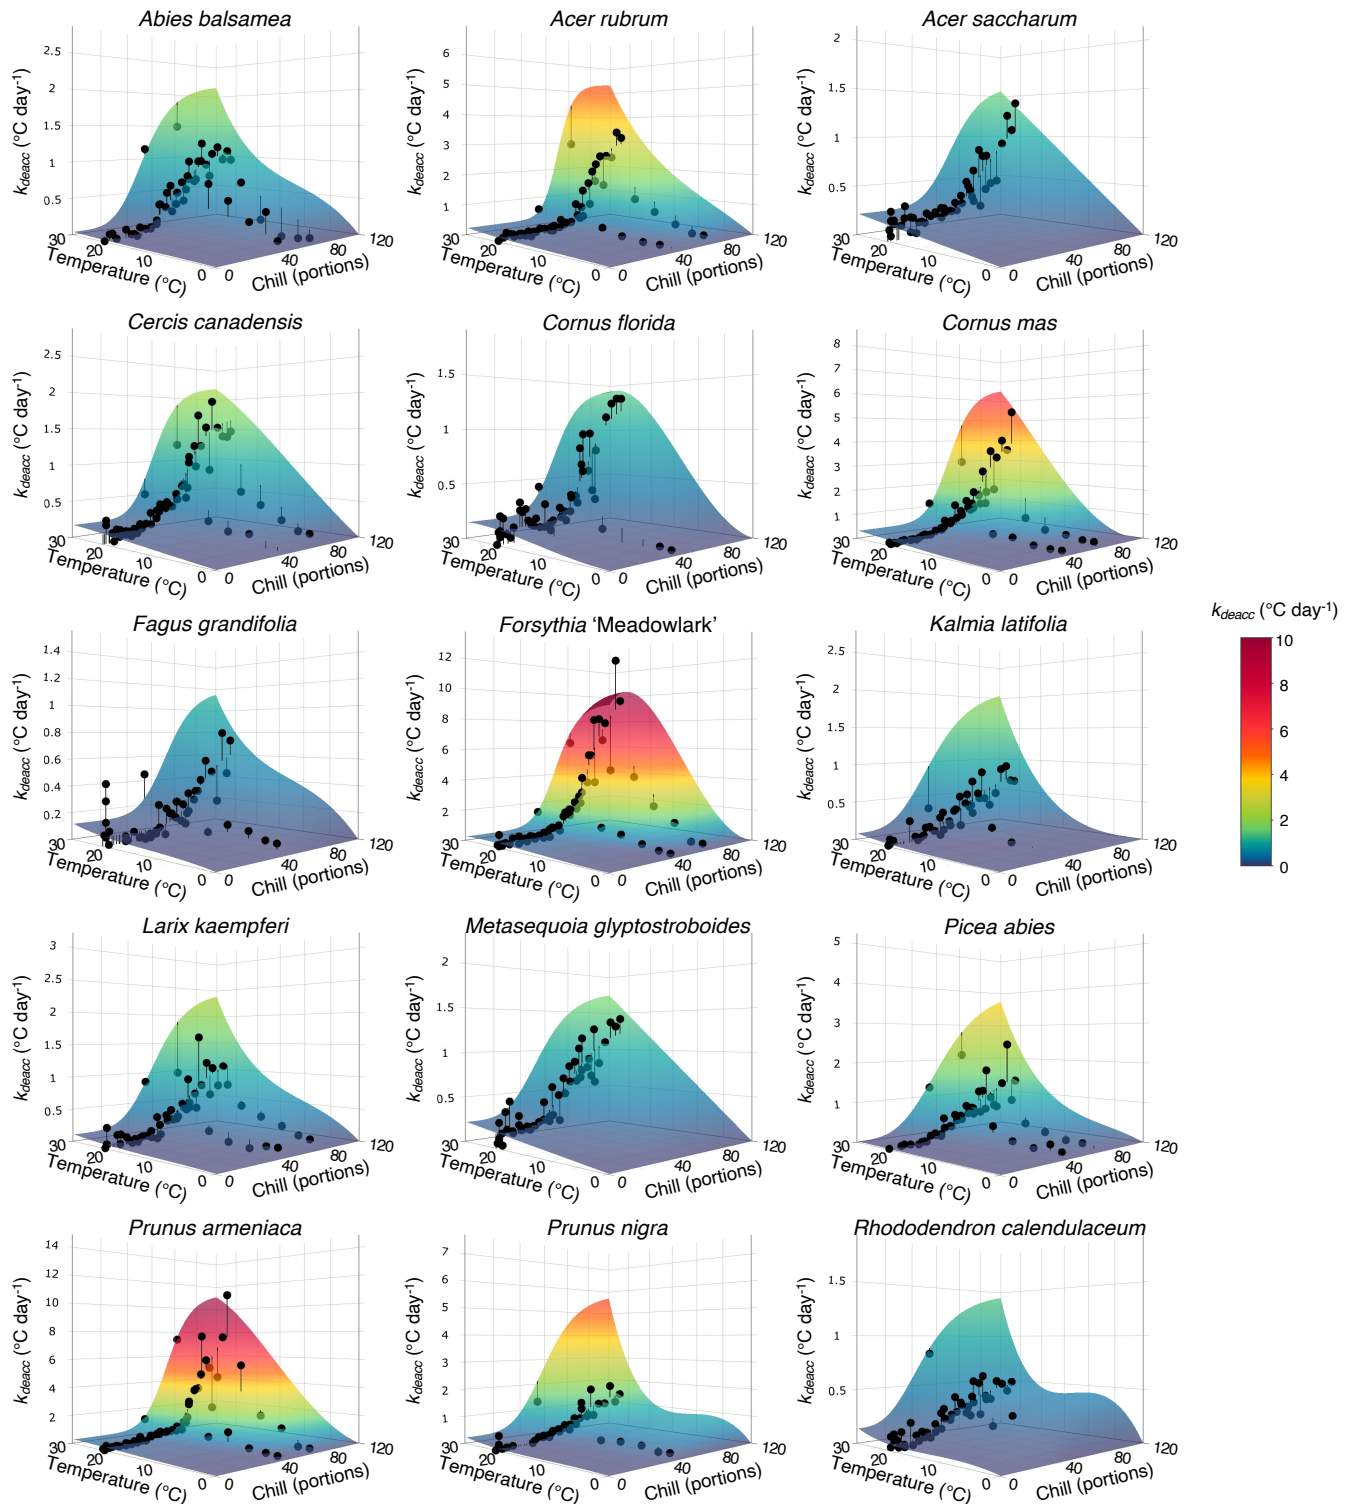

**Figure S17. Plasticity in temperature and chill accumulation response.** Predicted rates of deacclimation (surface plot) based on individual species measured responses (circles) to chill and temperature. Lines connect points to surface plot to demonstrate residuals. Different z axes are used such that surface curvature is visible, but color scale used is the same for all species.

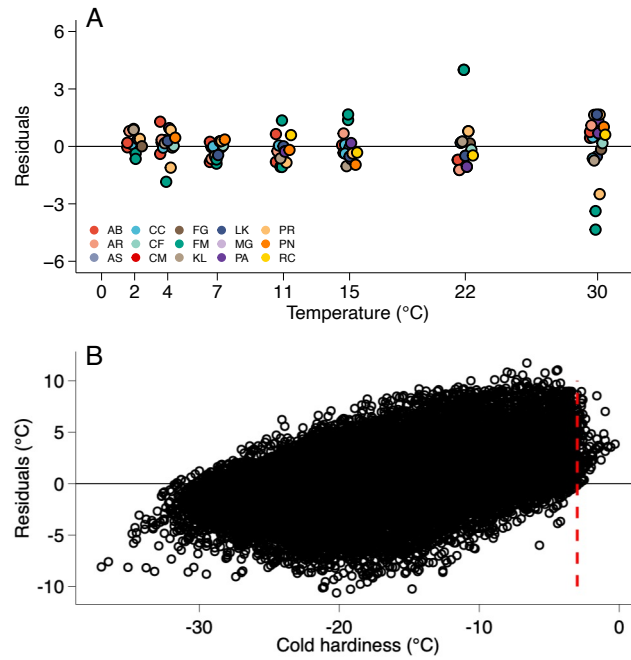

**Figure S18. Residuals for rates of deacclimation and cold hardness measurements.** Studentized residuals for rates of deacclimation for 9 species based on a linear model response (A) and residuals based on linear deacclimation rates at 22 °C at weekly collections for all species (B). Red dashed line shows approximate limit of detection at -3 °C. AB – *Abies balsamea*; AR – *Acer rubrum*; AS – *Acer saccharum*; CC – *Cercis canadensis*; CF – *Cornus florida*; CM – *Cornus mas*; FG – *Fagus grandifolia*; FM – *Forsythia* 'Meadowlark'; KL – *Kalmia latifolia*; LK – *Larix kaempferi*; MG – *Metasequoia glyptostroboides*; PA – *Picea abies*; PR – *Prunus armeniaca*; PN – *Prunus nigra*; RC – *Rhododendron calendulaceum*.

*Abies balsamea* – 2019-2020

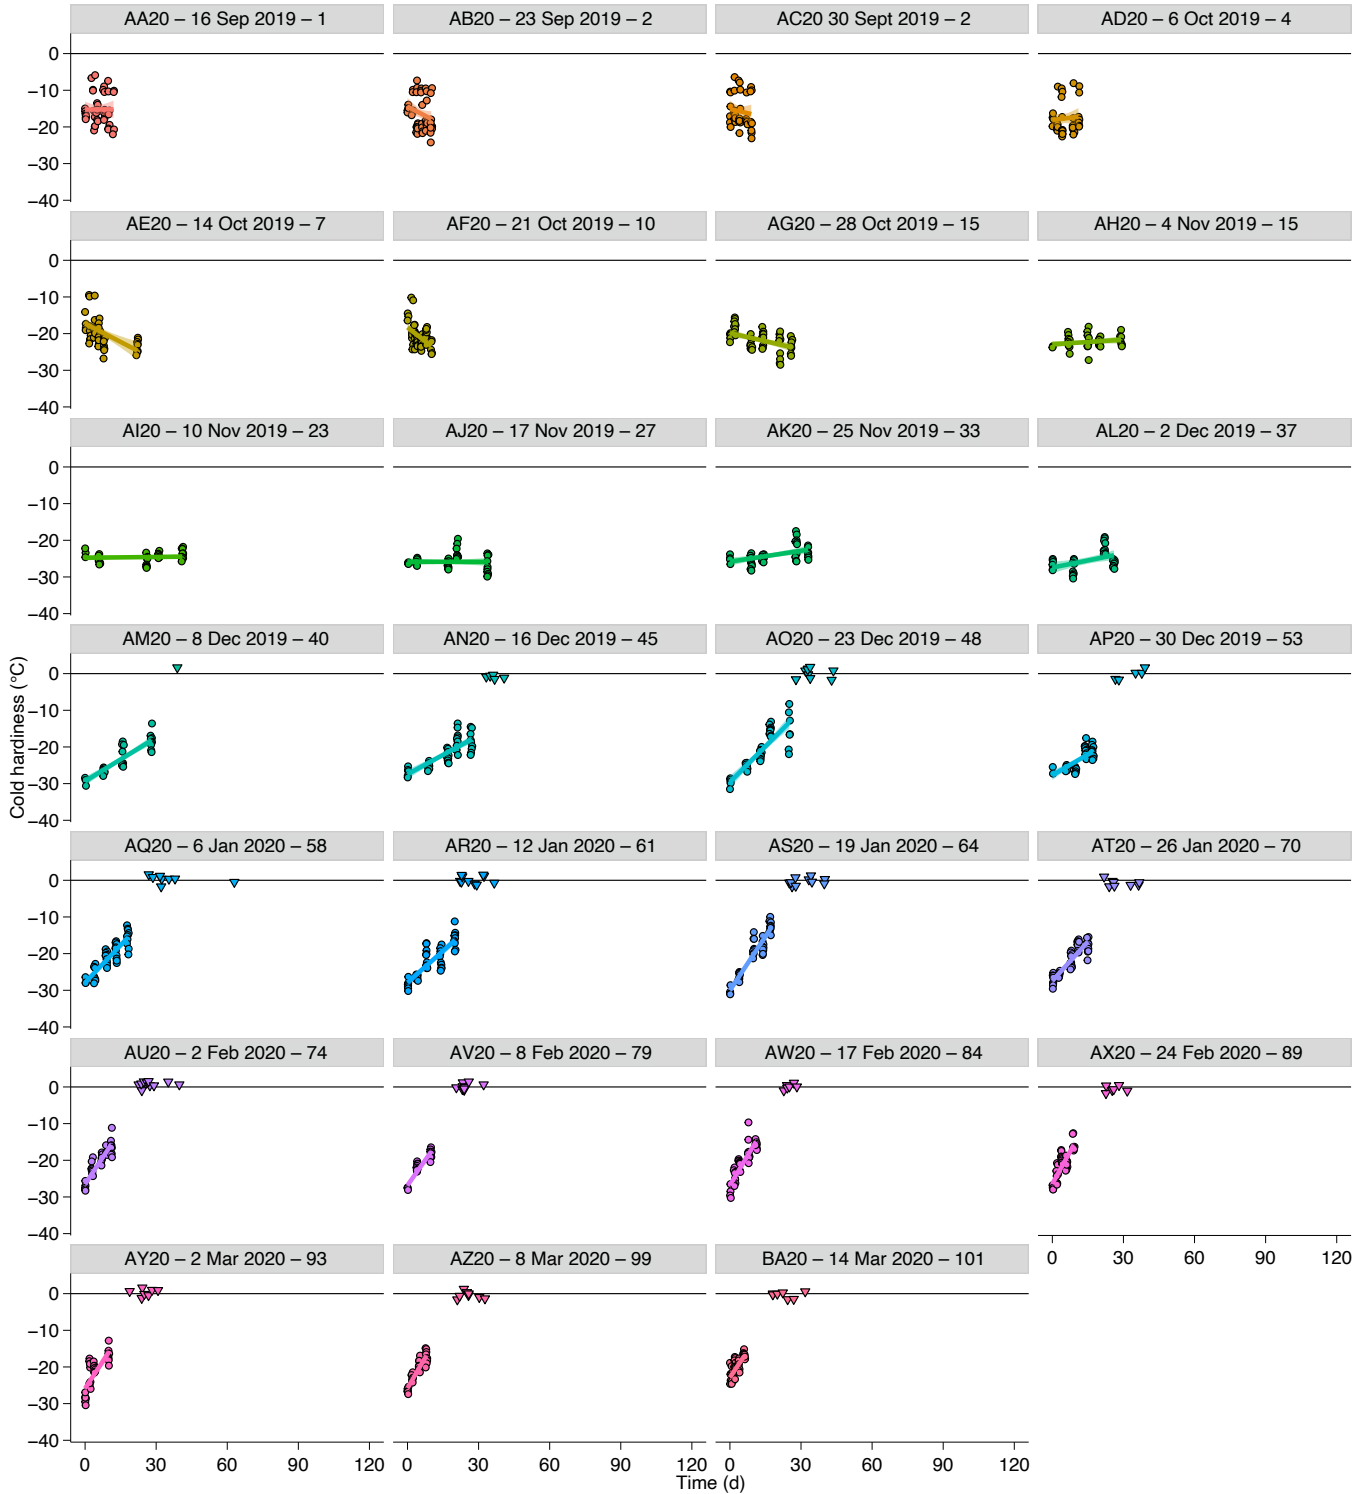

**Figure S19. Deacclimation and budbreak of *Abies balsamea* buds collected during the 2019-2020 dormant season.** Loss of cold hardiness (circles) and budbreak (upside down triangles at 0 °C line) for *Abies balsamea*. Each graph is identified by collection name, date of collection, and chill accumulated in portions.

*Acer rubrum* – 2019-2020

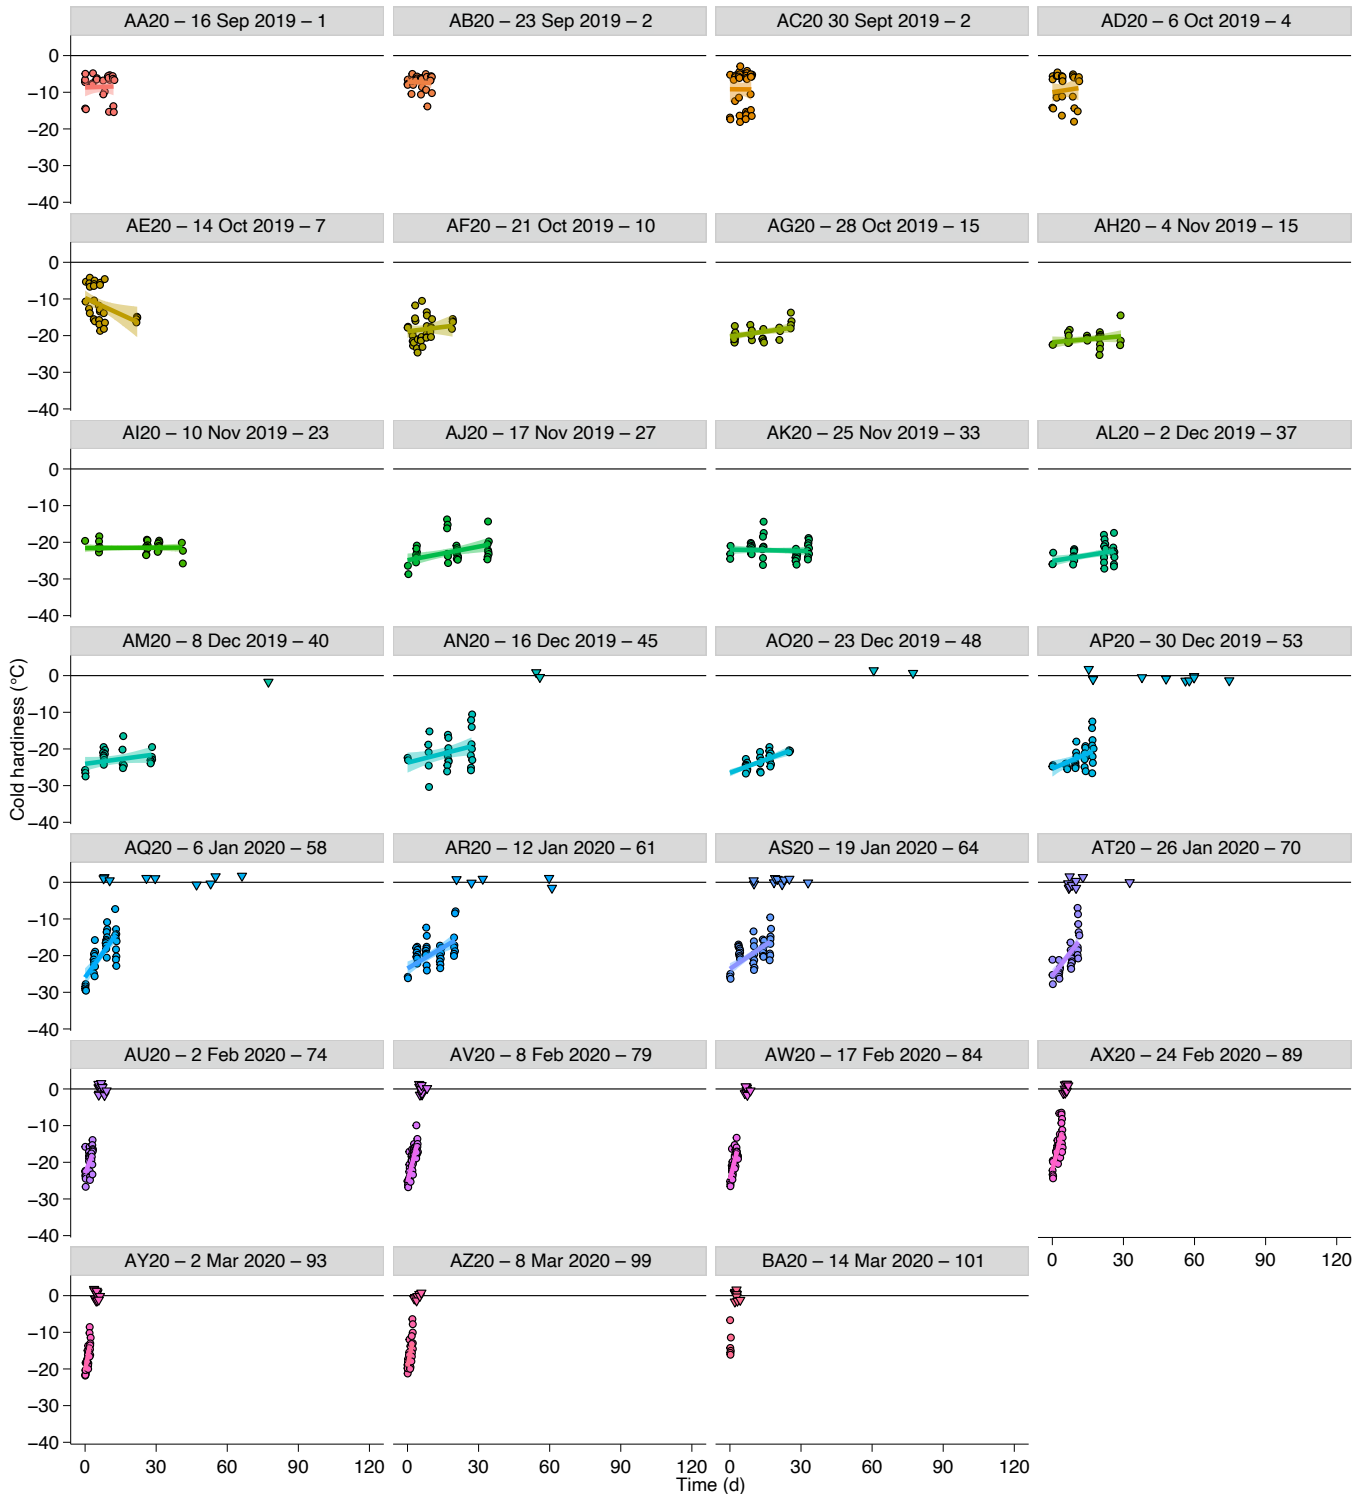

**Figure S20. Deacclimation and budbreak of *Acer rubrum* buds collected during the 2019-2020 dormant season.** Loss of cold hardiness (circles) and budbreak (upside down triangles at 0 °C line) for *Acer rubrum*. Each graph is identified by collection name, date of collection, and chill accumulated in portions.

### Acer saccharum – 2019-2020

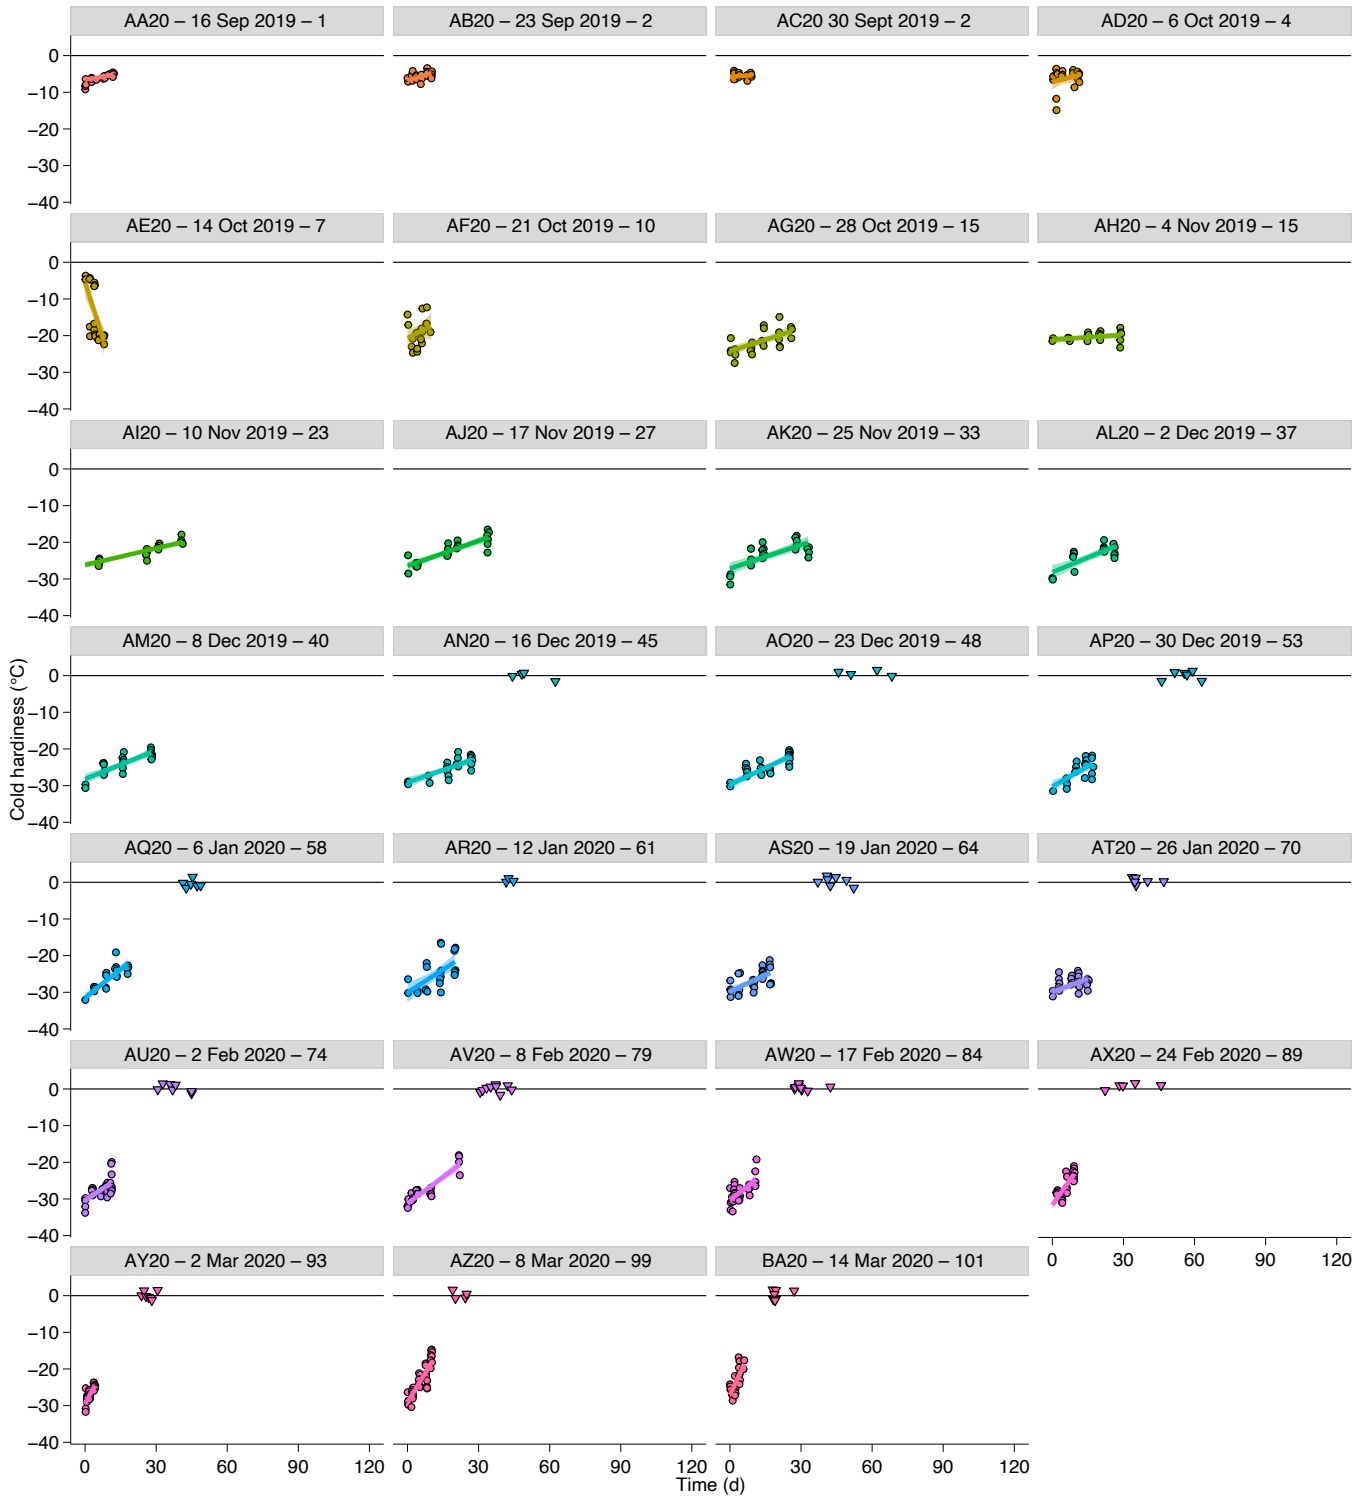

**Figure S21. Deacclimation and budbreak of *Acer saccharum* buds collected during the 2019-2020 dormant season.** Loss of cold hardiness (circles) and budbreak (upside down triangles at 0 °C line) for *Acer saccharum*. Each graph is identified by collection name, date of collection, and chill accumulated in portions.



*Cercis canadensis* – 2019-2020

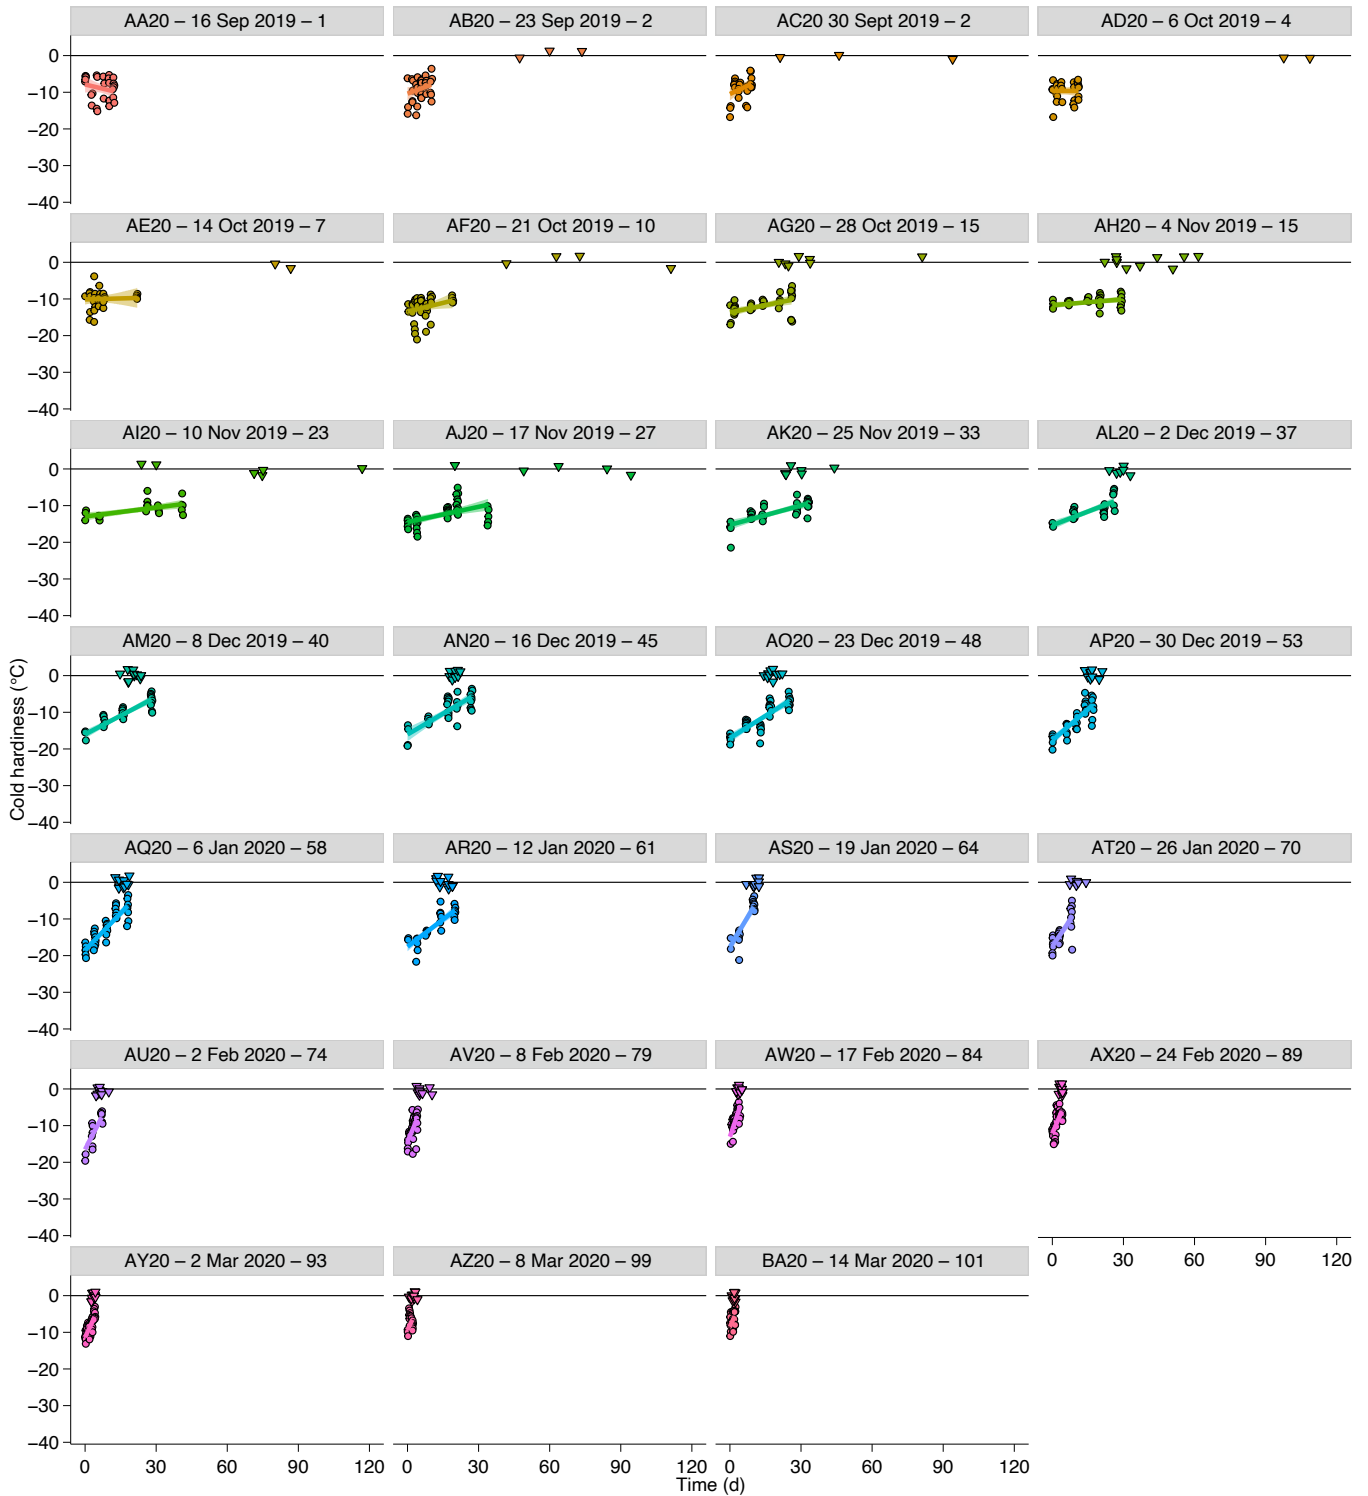

**Figure S22. Deacclimation and budbreak of *Cercis canadensis* buds collected during the 2019-2020 dormant season.** Loss of cold hardiness (circles) and budbreak (upside down triangles at 0 °C line) for *Cercis canadensis*. Each graph is identified by collection name, date of collection, and chill accumulated in portions.

*Cornus florida* – 2019-2020

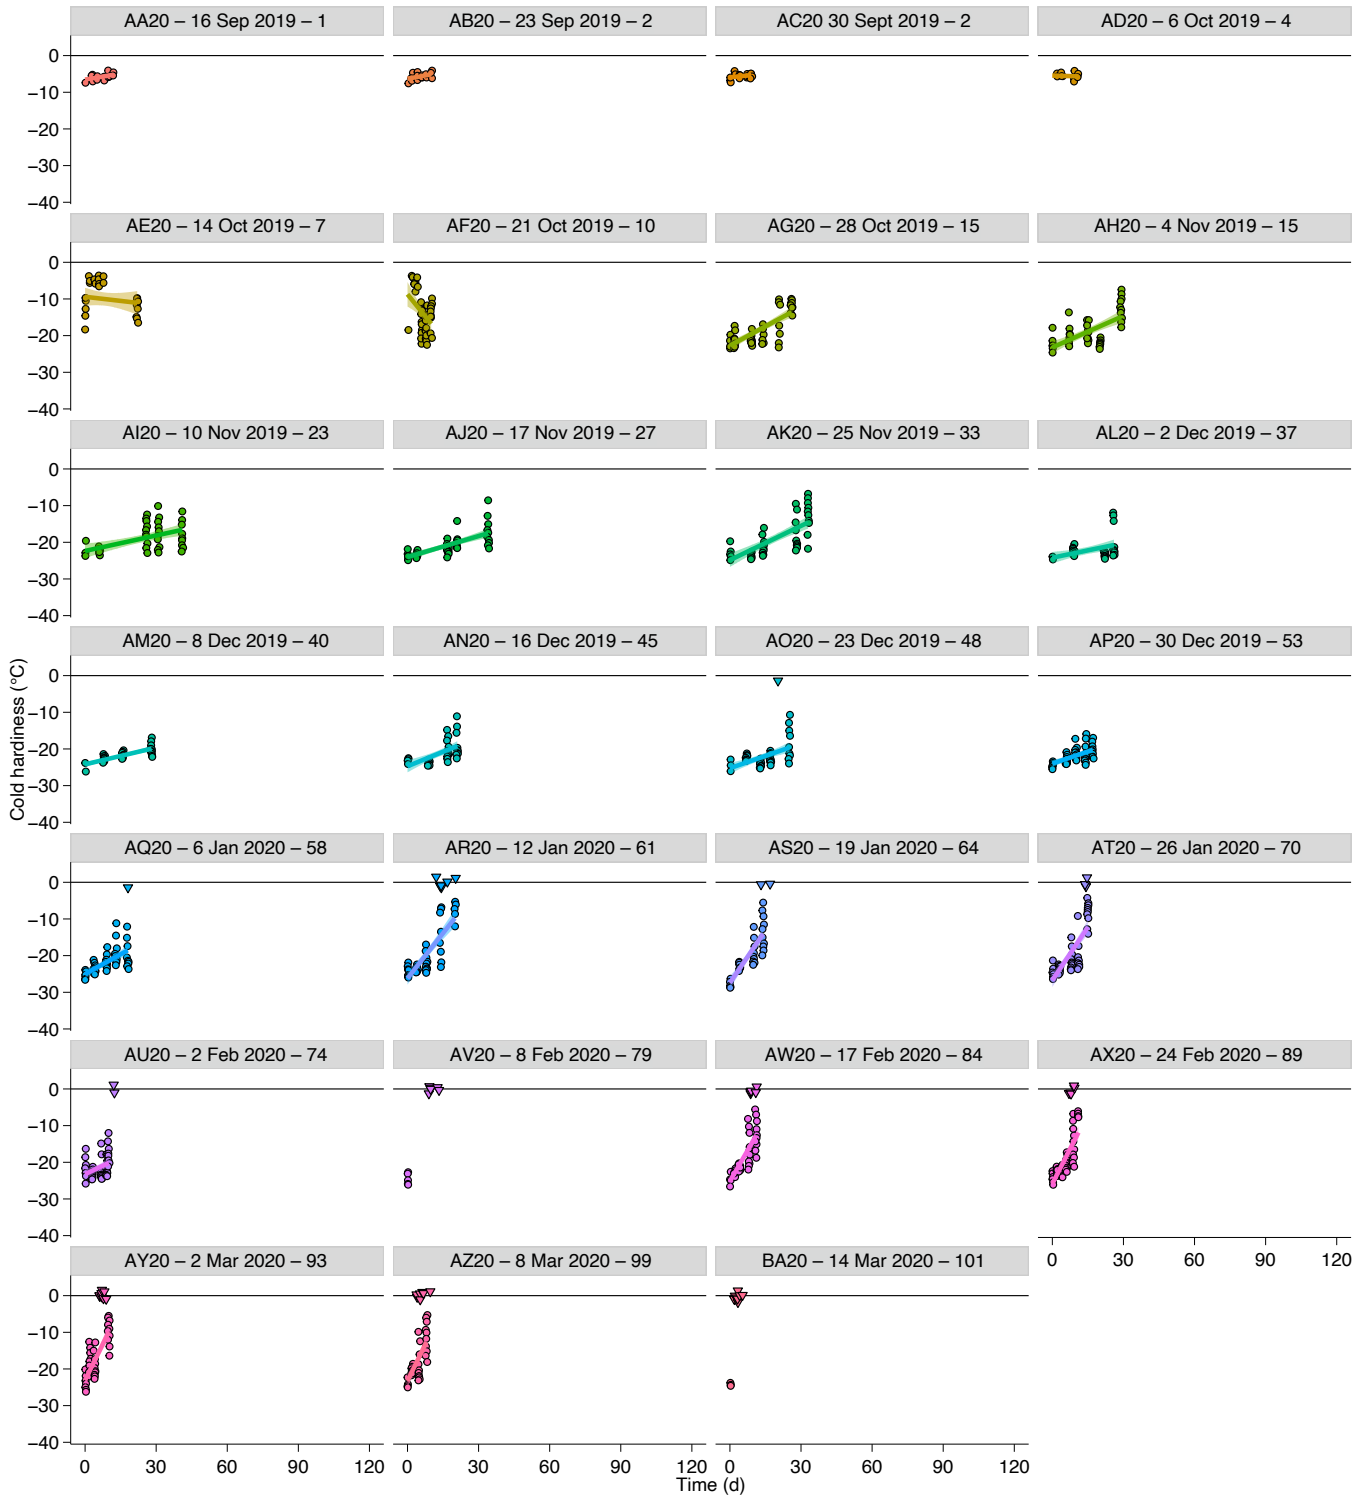

**Figure S23. Deacclimation and budbreak of *Cornus florida* buds collected during the 2019-2020 dormant season.** Loss of cold hardiness (circles) and budbreak (upside down triangles at 0 °C line) for *Cornus florida*. Each graph is identified by collection name, date of collection, and chill accumulated in portions.

*Cornus mas* – 2019-2020

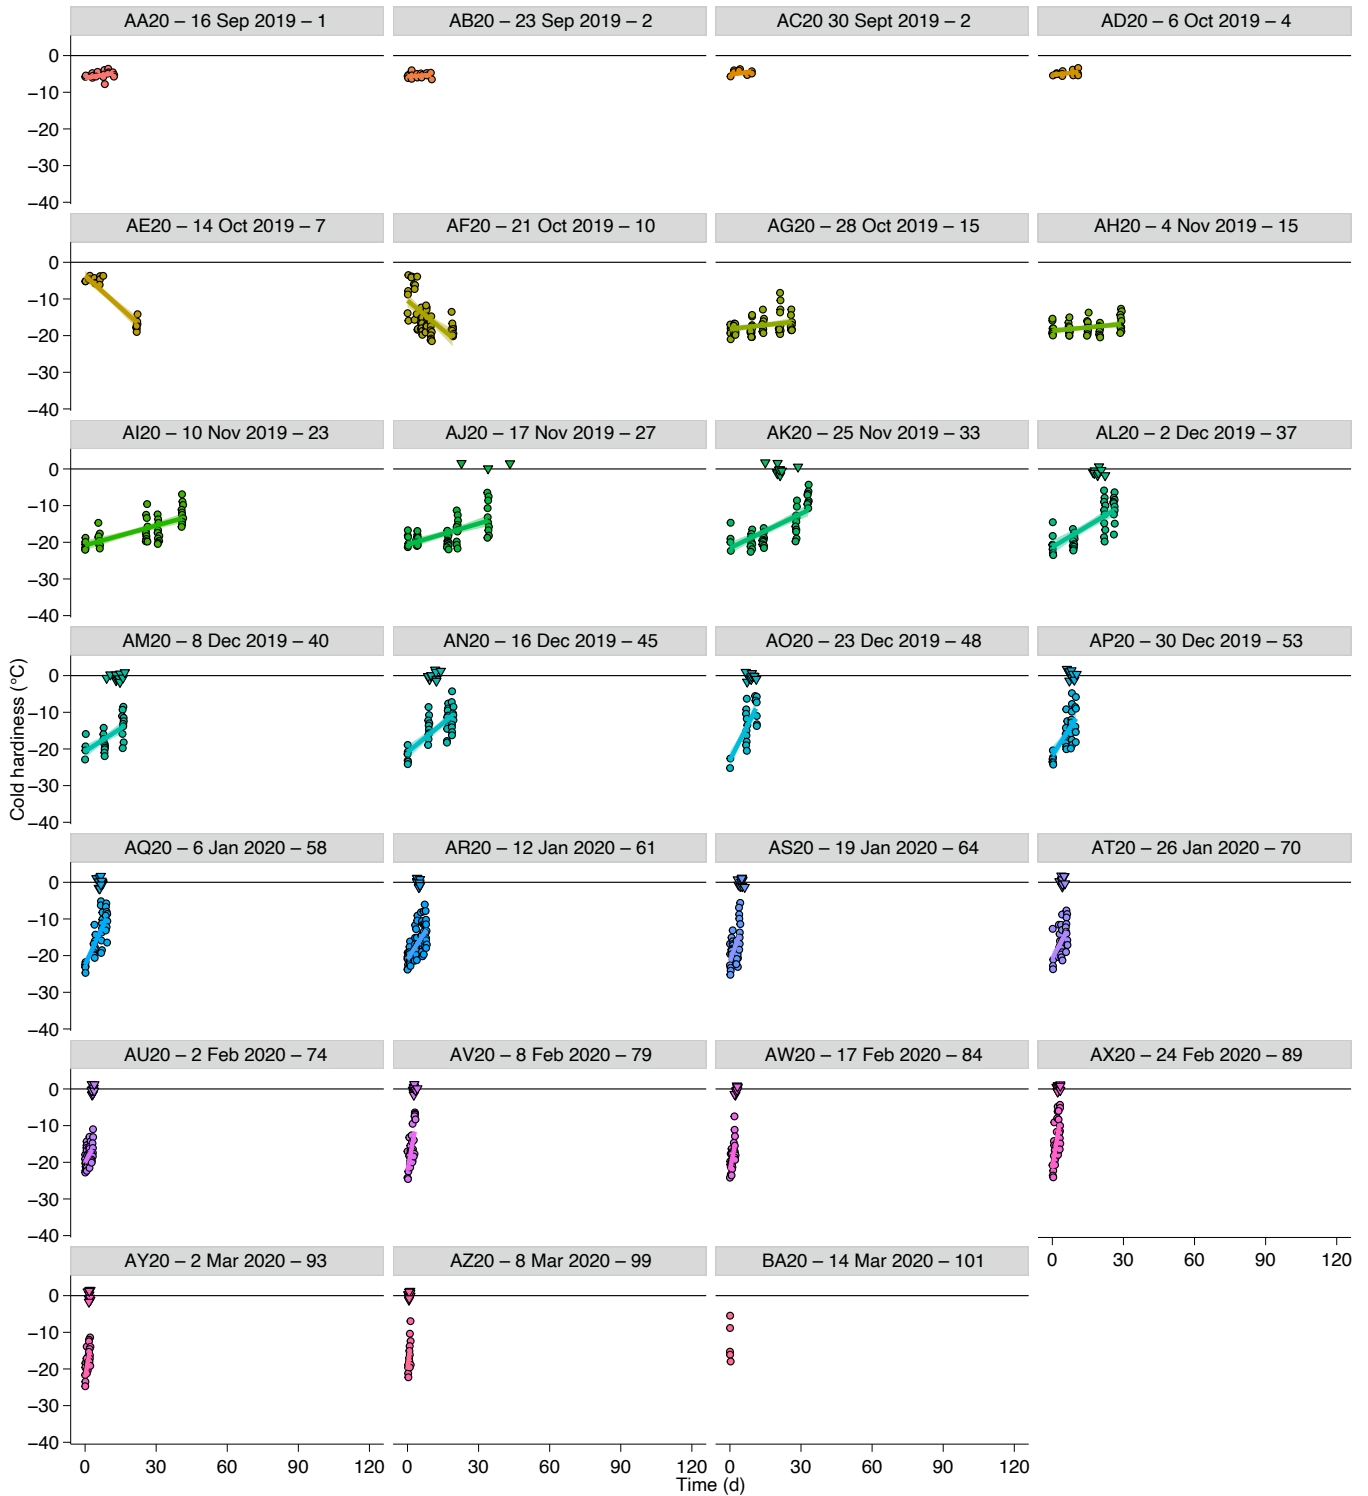

**Figure S24. Deacclimation and budbreak of *Cornus mas* buds collected during the 2019-2020 dormant season.** Loss of cold hardiness (circles) and budbreak (upside down triangles at 0 °C line) for *Cornus mas*. Each graph is identified by collection name, date of collection, and chill accumulated in portions.

*Fagus grandifolia* – 2019-2020

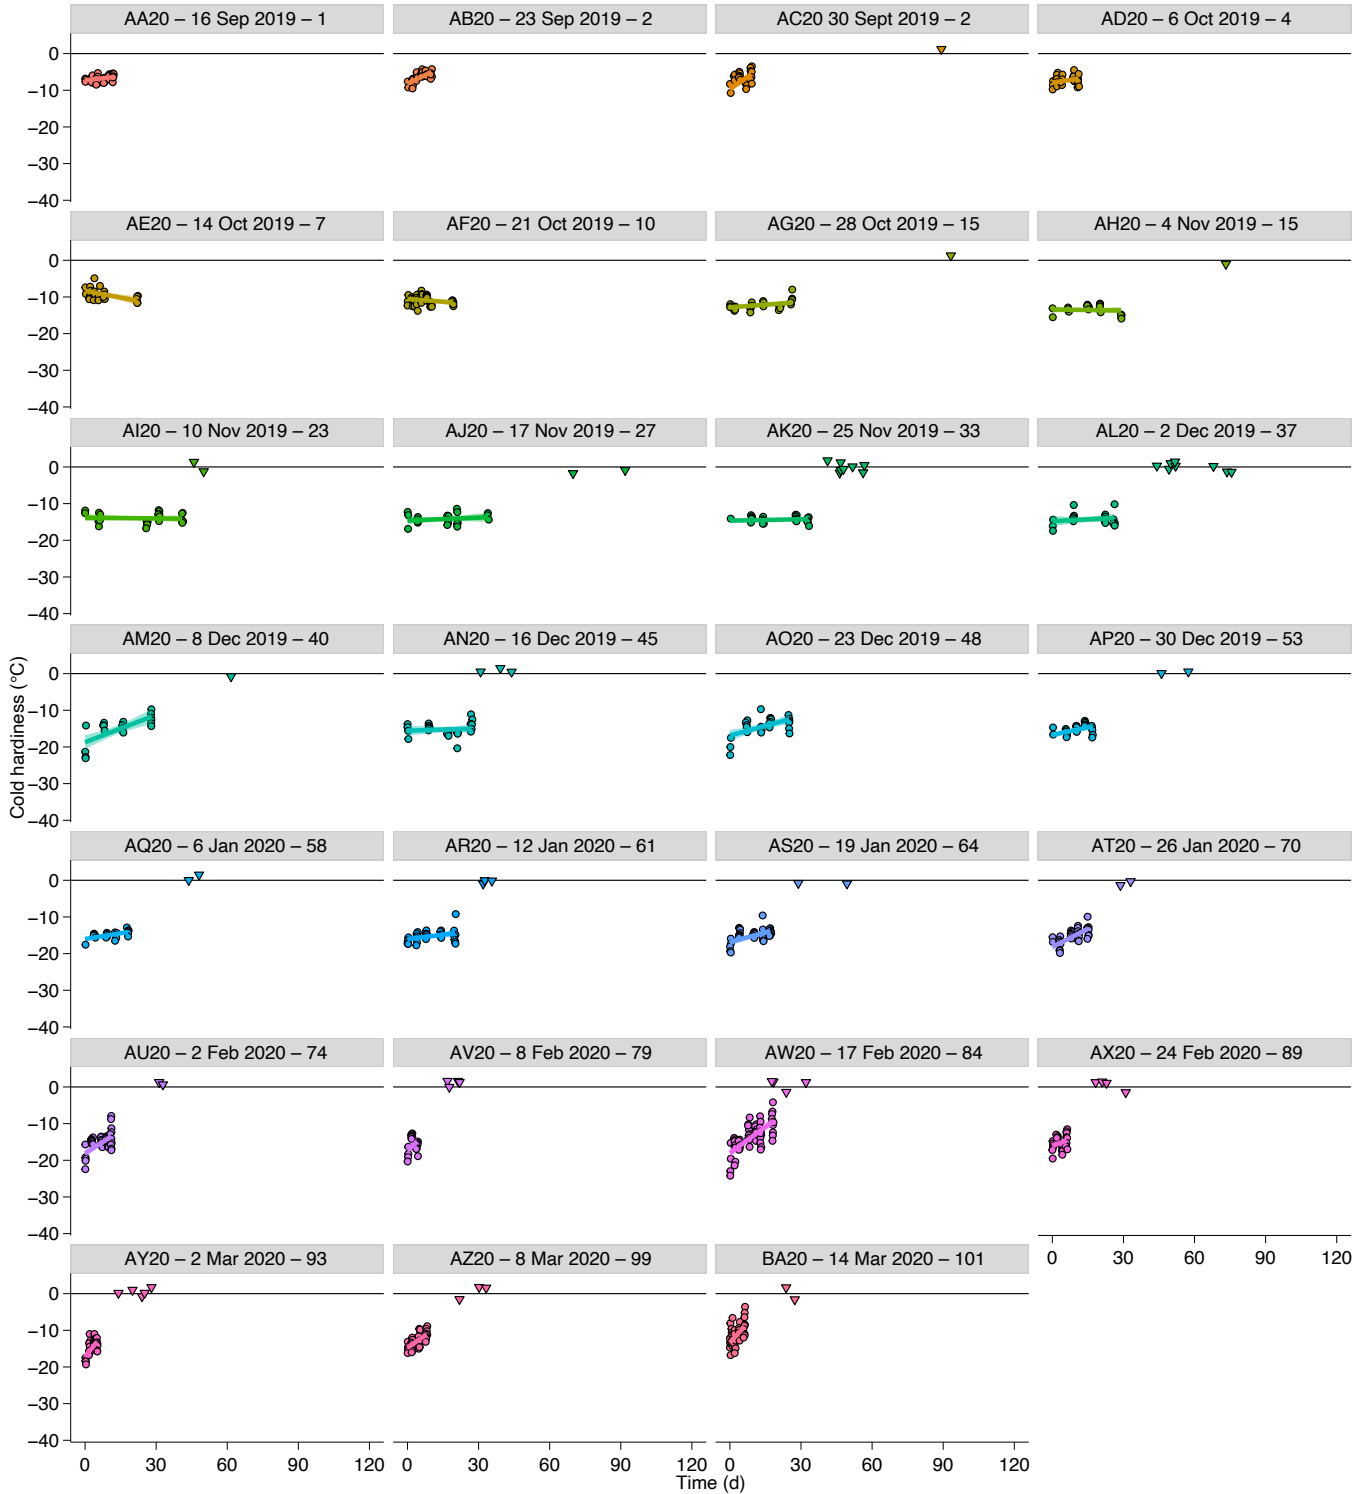

**Figure S25. Deacclimation and budbreak of *Fagus grandifolia* buds collected during the 2019-2020 dormant season.** Loss of cold hardiness (circles) and budbreak (upside down triangles at 0 °C line) for *Fagus grandifolia*. Each graph is identified by collection name, date of collection, and chill accumulated in portions.

*Forsythia* 'Meadowlark' – 2019-2020

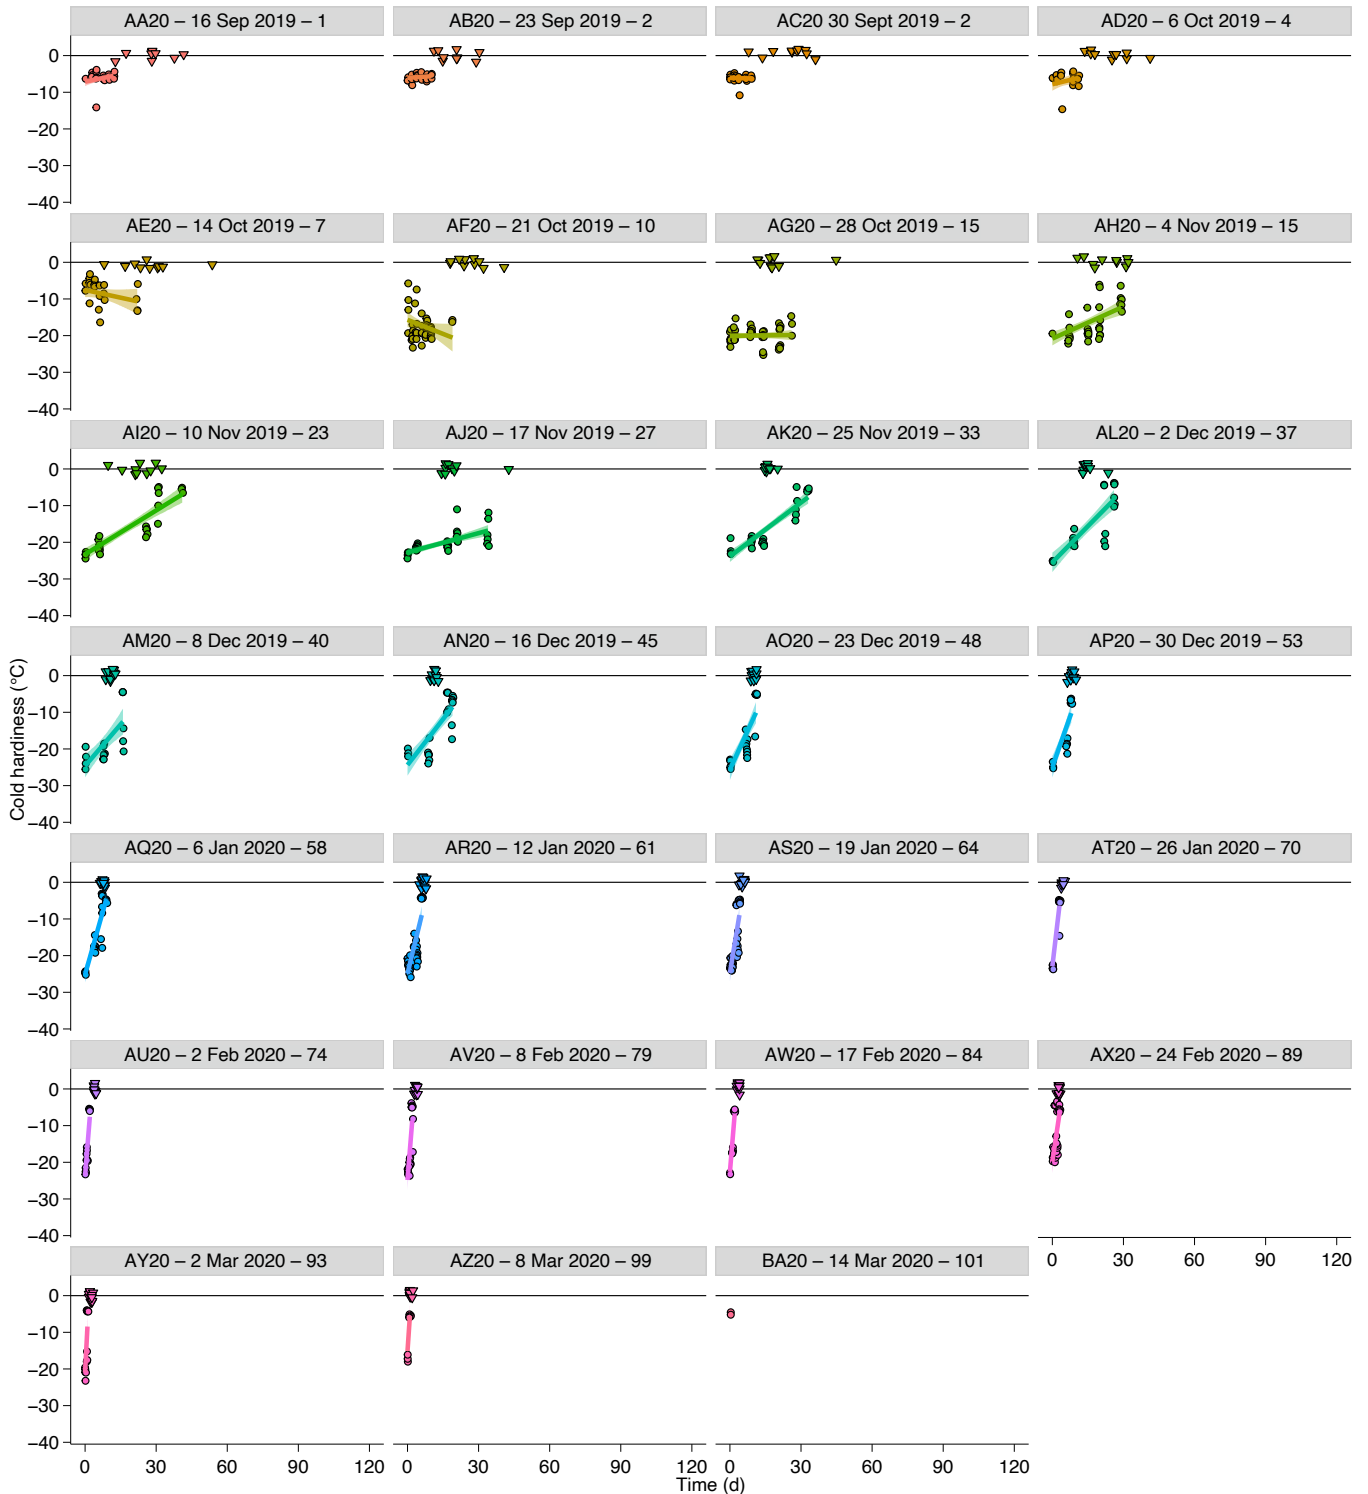

**Figure S26. Deacclimation and budbreak of *Forsythia* 'Meadowlark' buds collected during the 2019-2020 dormant season.** Loss of cold hardiness (circles) and budbreak (upside down triangles at 0 °C line) for *Forsythia* 'Meadowlark'. Each graph is identified by collection name, date of collection, and chill accumulated in portions.

*Kalmia latifolia* – 2019-2020

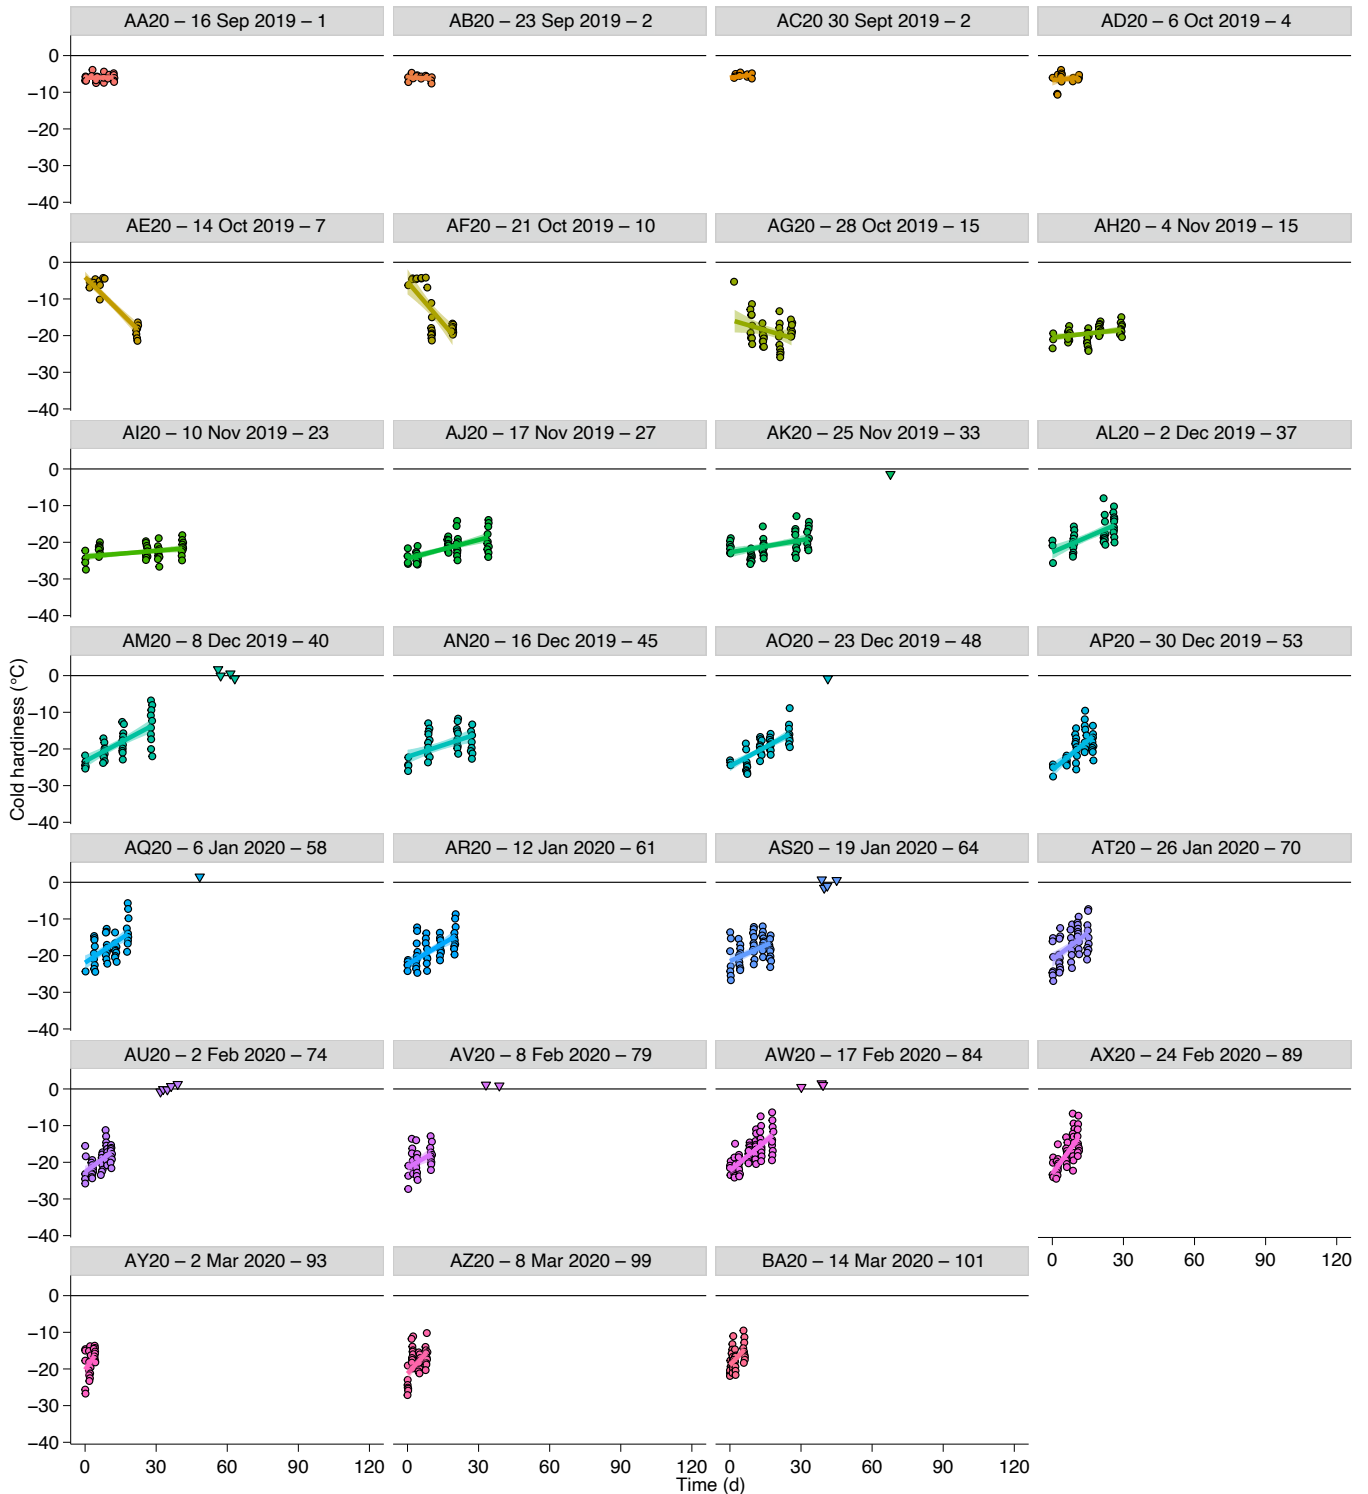

**Figure S27. Deacclimation and budbreak of *Kalmia latifolia* buds collected during the 2019-2020 dormant season.** Loss of cold hardiness (circles) and budbreak (upside down triangles at 0 °C line) for *Kalmia latifolia*. Each graph is identified by collection name, date of collection, and chill accumulated in portions.

*Larix kaempferi* – 2019-2020

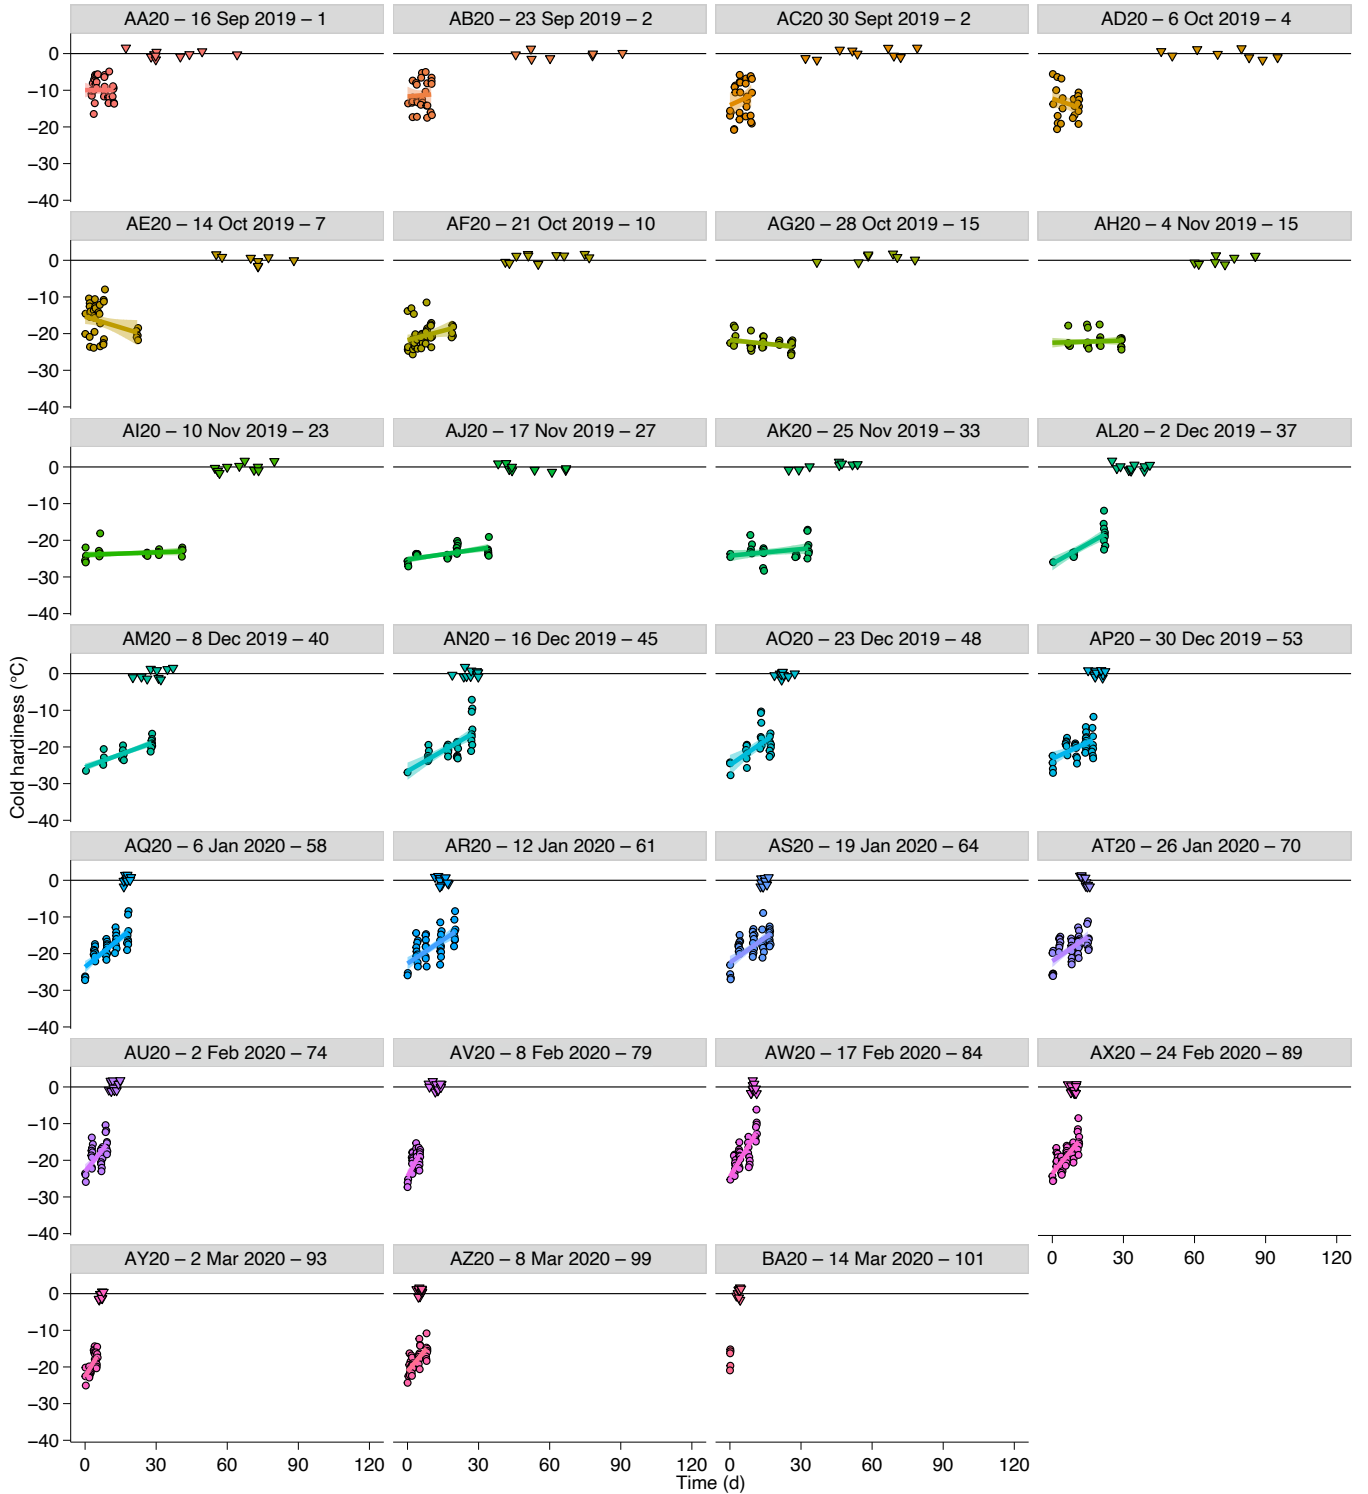

**Figure S28. Deacclimation and budbreak of *Larix kaempferi* buds collected during the 2019-2020 dormant season.** Loss of cold hardiness (circles) and budbreak (upside down triangles at 0 °C line) for *Larix kaempferi*. Each graph is identified by collection name, date of collection, and chill accumulated in portions.

*Metasequoia glyptostroboides* – 2019-2020

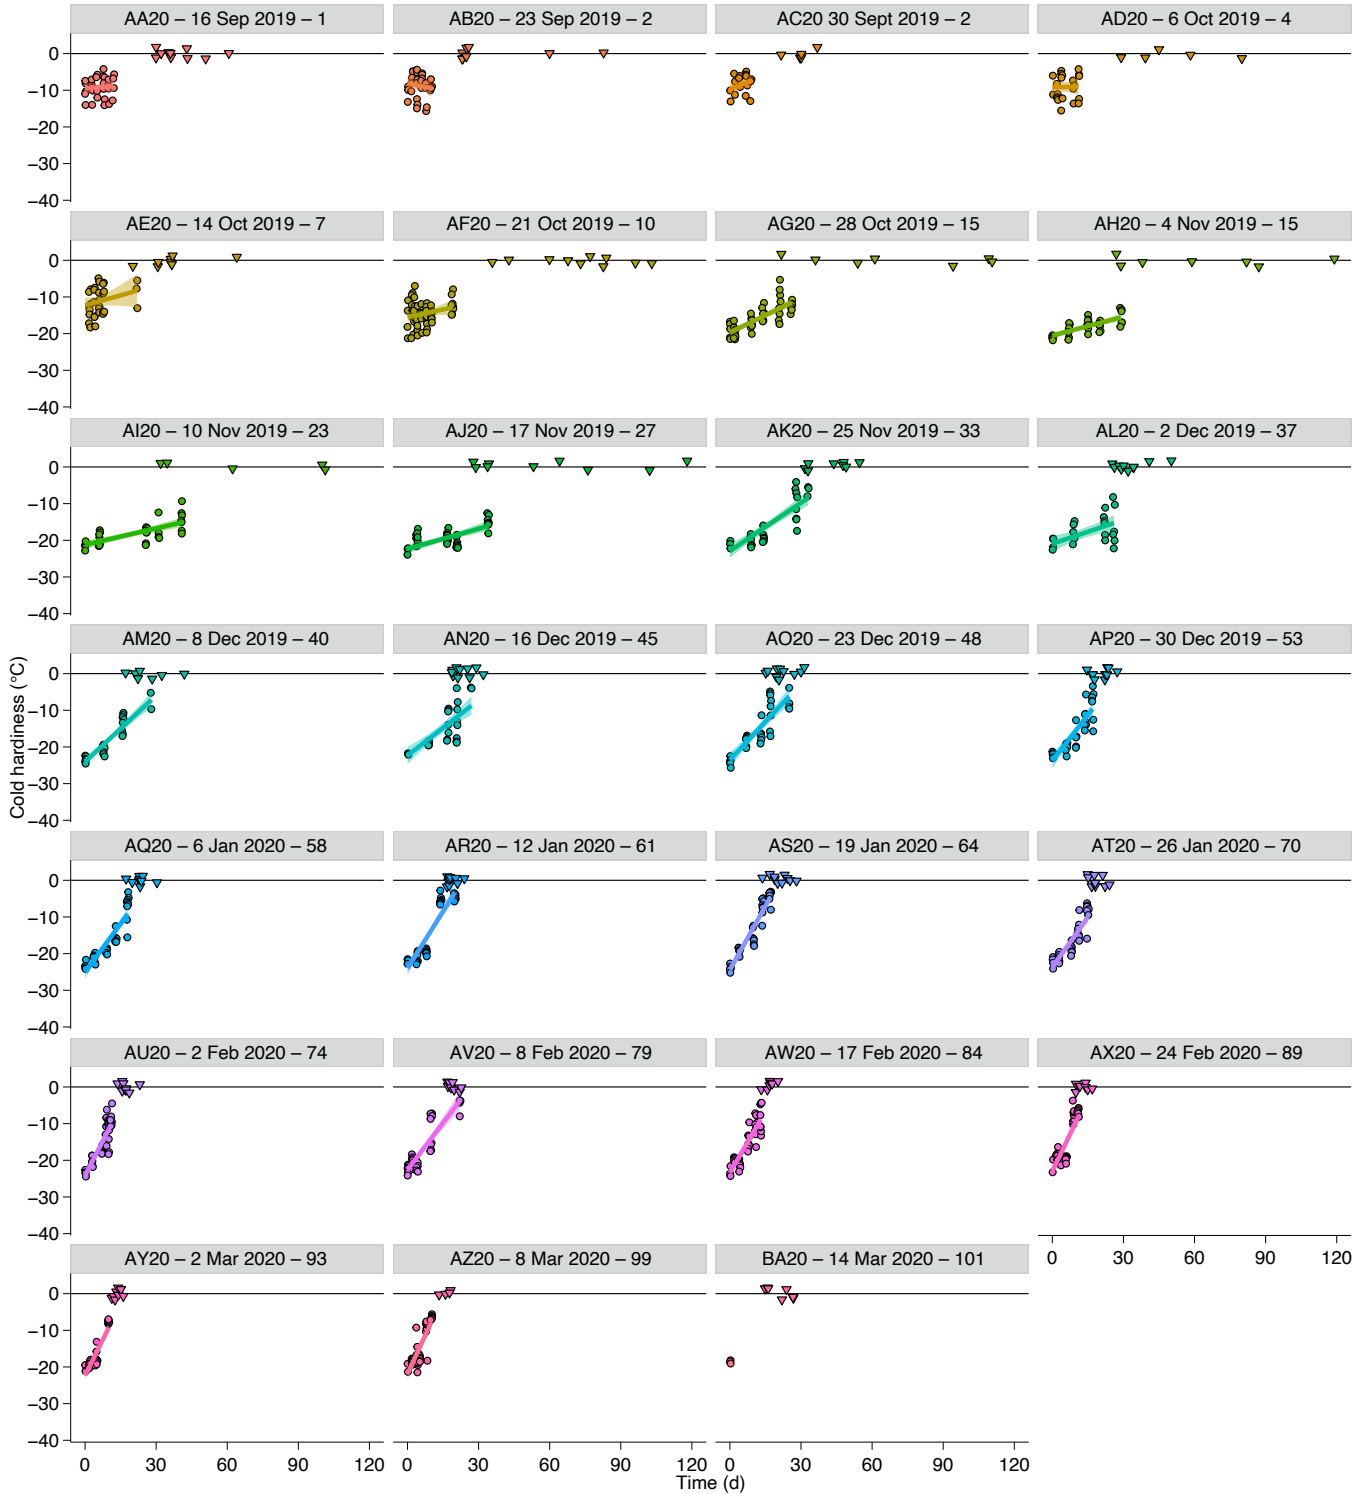

**Figure S29. Deacclimation and budbreak of *Metasequoia glyptostroboides* buds collected during the 2019-2020 dormant season.** Loss of cold hardiness (circles) and budbreak (upside down triangles at 0 °C line) for *Metasequoia glyptostroboides*. Each graph is identified by collection name, date of collection, and chill accumulated in portions.



*Picea abies* – 2019-2020

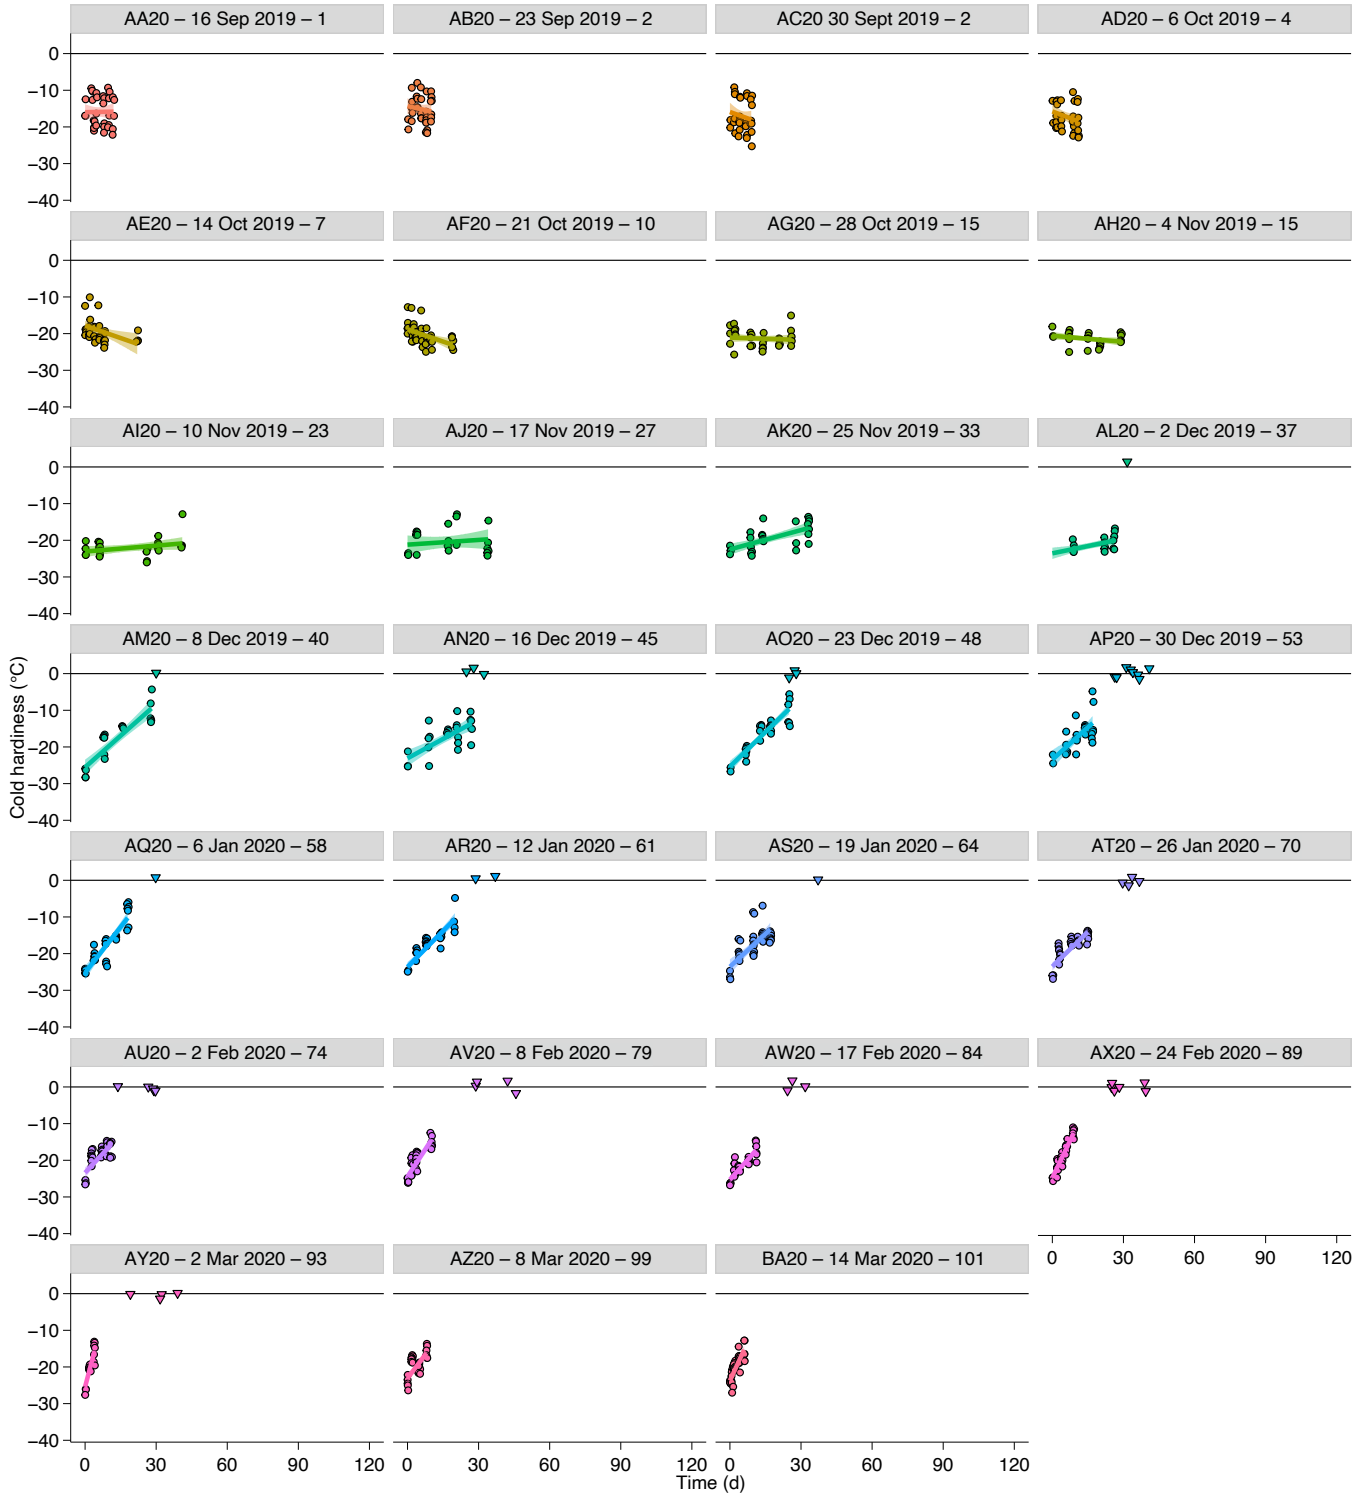

**Figure S30. Deacclimation and budbreak of *Picea abies* buds collected during the 2019-2020 dormant season.** Loss of cold hardiness (circles) and budbreak (upside down triangles at 0 °C line) for *Picea abies*. Each graph is identified by collection name, date of collection, and chill accumulated in portions.

*Prunus armeniaca* – 2019-2020

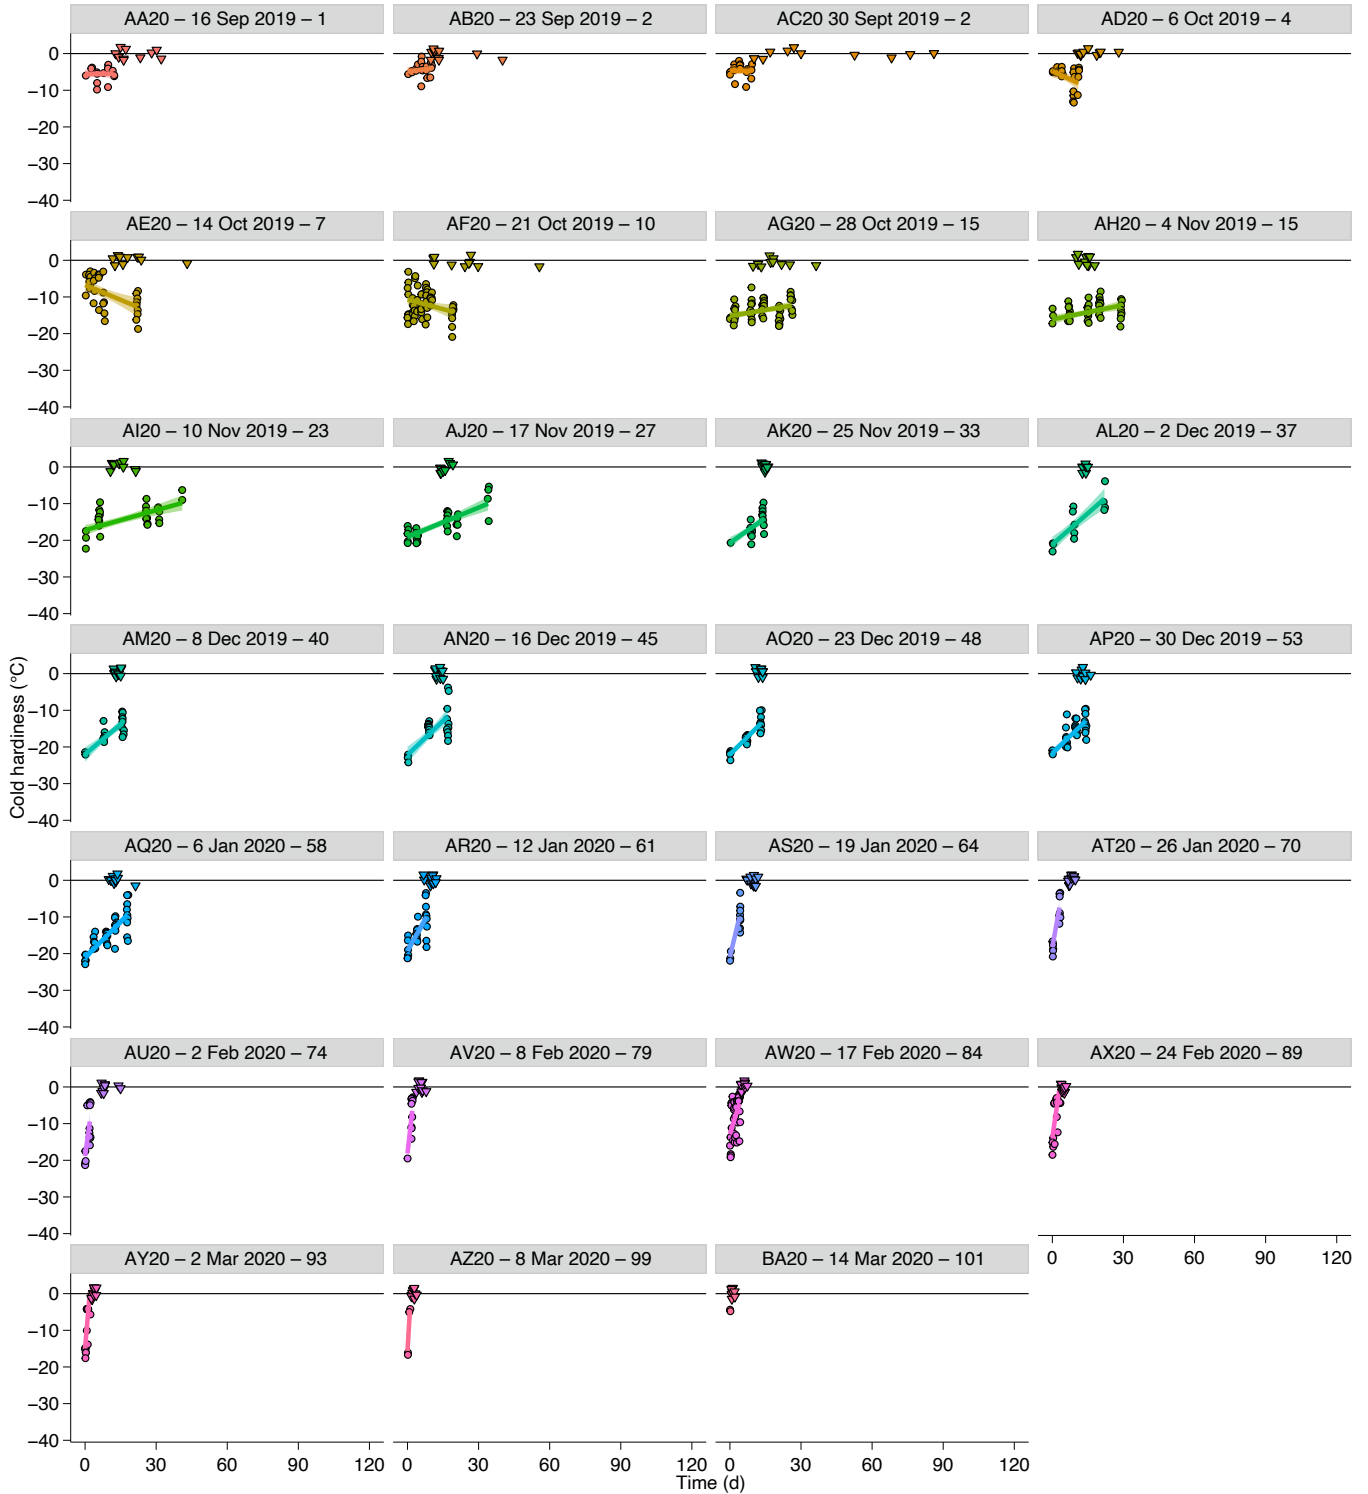

**Figure S31. Deacclimation and budbreak of *Prunus armeniaca* buds collected during the 2019-2020 dormant season.** Loss of cold hardiness (circles) and budbreak (upside down triangles at 0 °C line) for *Prunus armeniaca*. Each graph is identified by collection name, date of collection, and chill accumulated in portions.

*Prunus nigra* – 2019-2020

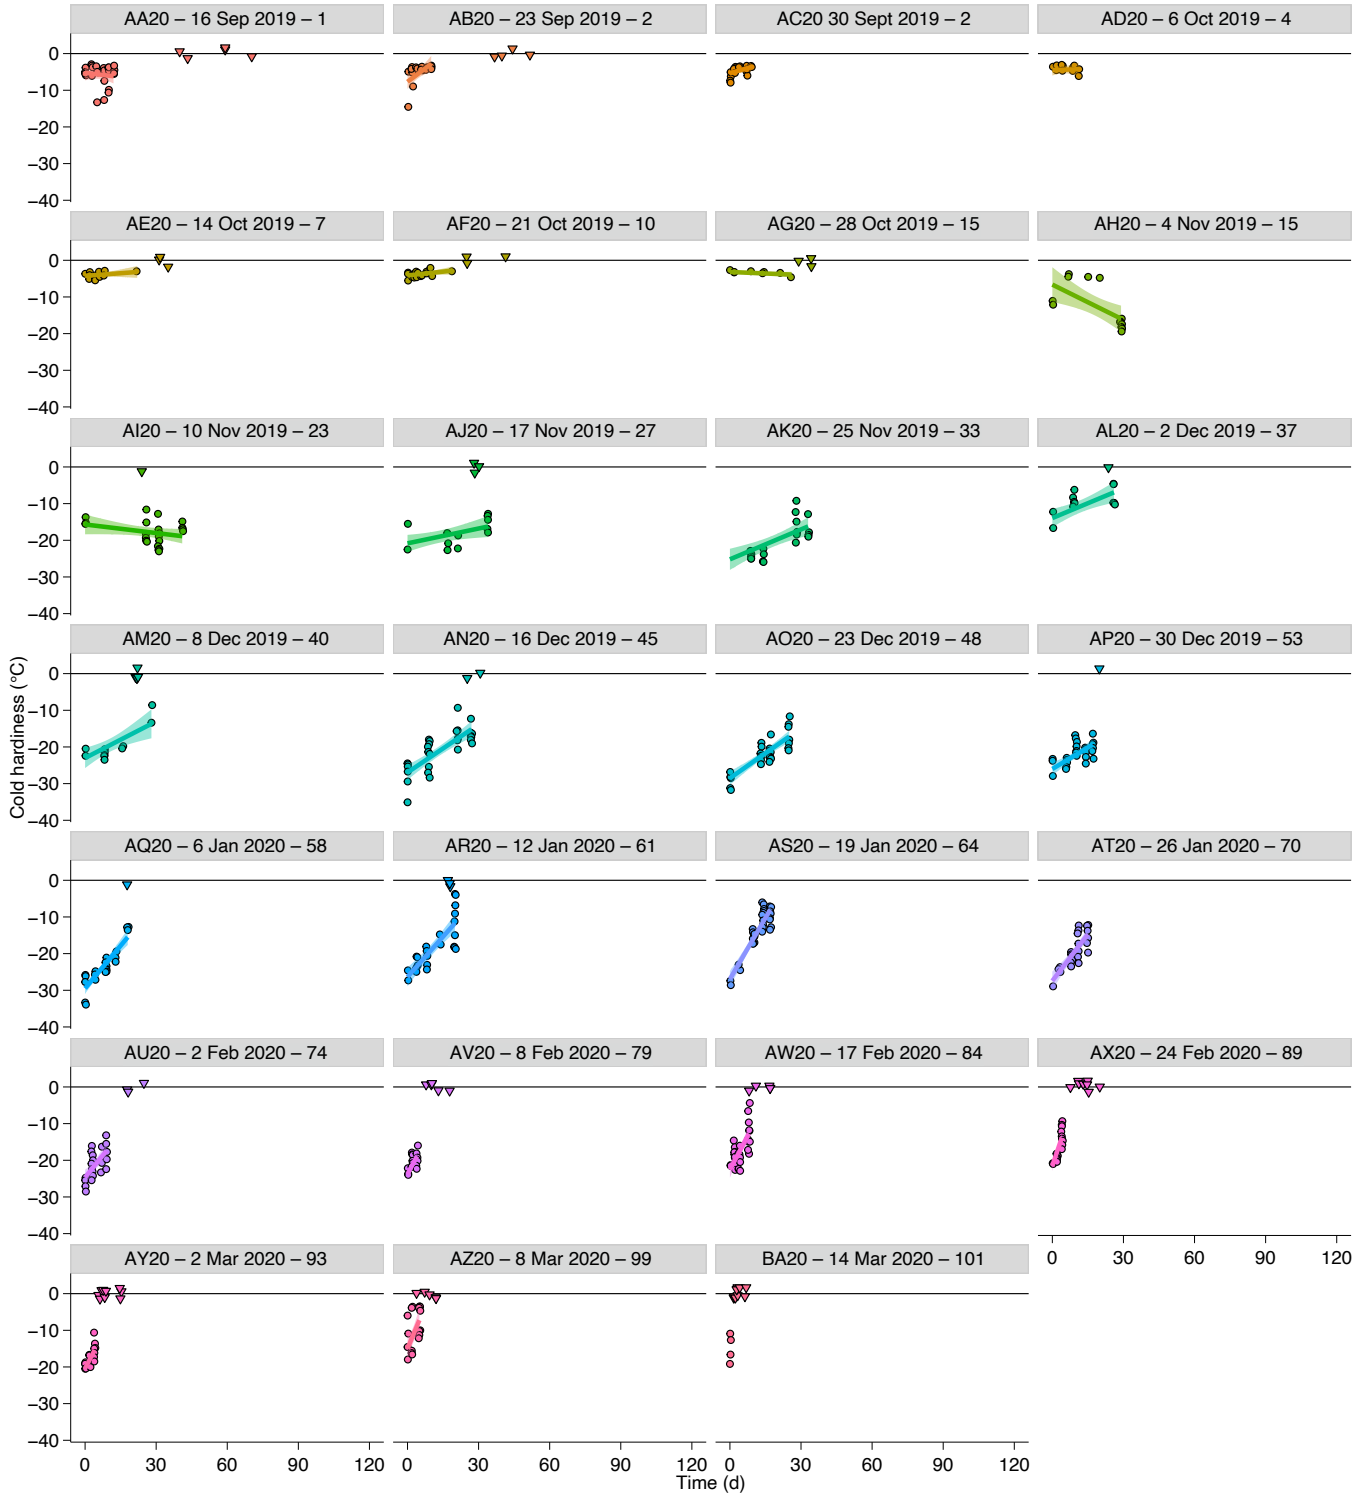

**Figure S32. Deacclimation and budbreak of *Prunus nigra* buds collected during the 2019-2020 dormant season.** Loss of cold hardiness (circles) and budbreak (upside down triangles at 0 °C line) for *Prunus nigra*. Each graph is identified by collection name, date of collection, and chill accumulated in portions.

*Rhododendron calendulaceum* – 2019-2020

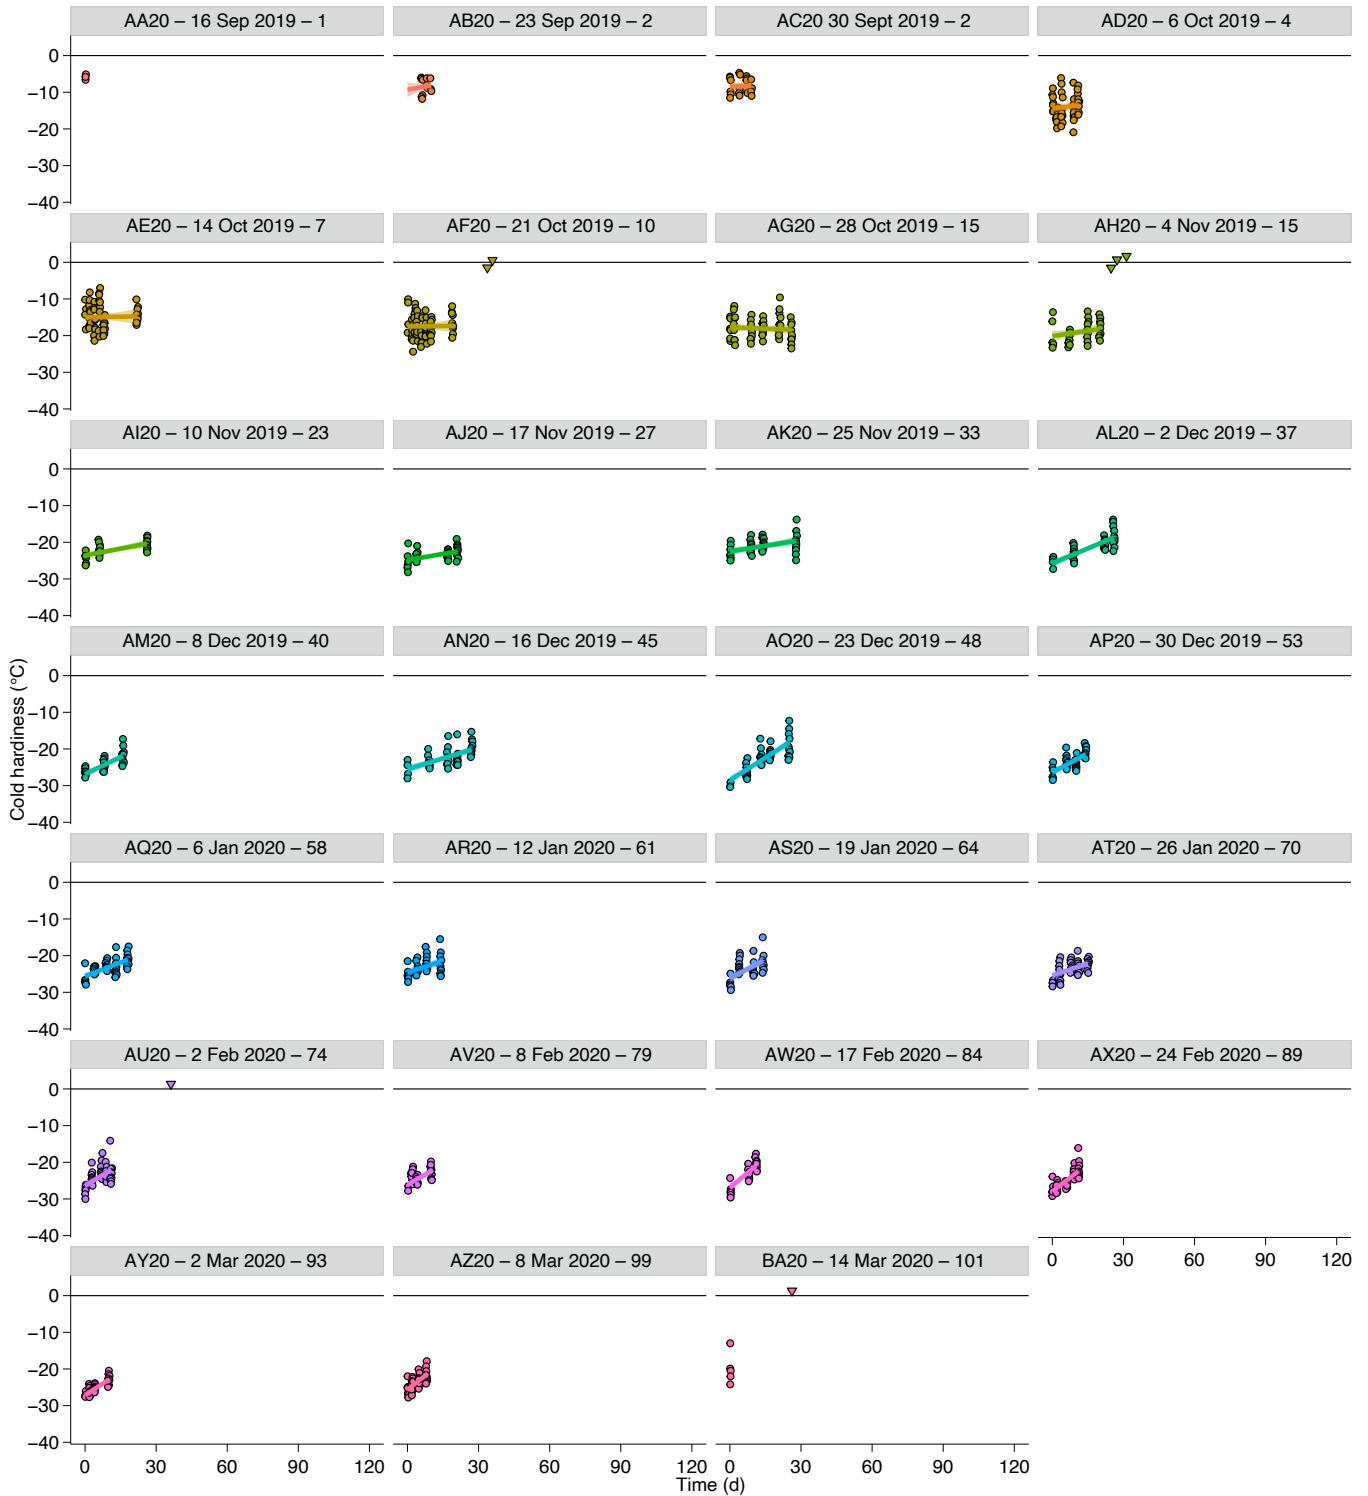

**Figure S33. Deacclimation and budbreak of *Rhododendron calendulaceum* buds collected during the 2019-2020 dormant season.** Loss of cold hardiness (circles) and budbreak (upside down triangles at 0 °C line) for *Rhododendron calendulaceum*. Each graph is identified by collection name, date of collection, and chill accumulated in portions.

*Abies balsamea* – 2020-2021

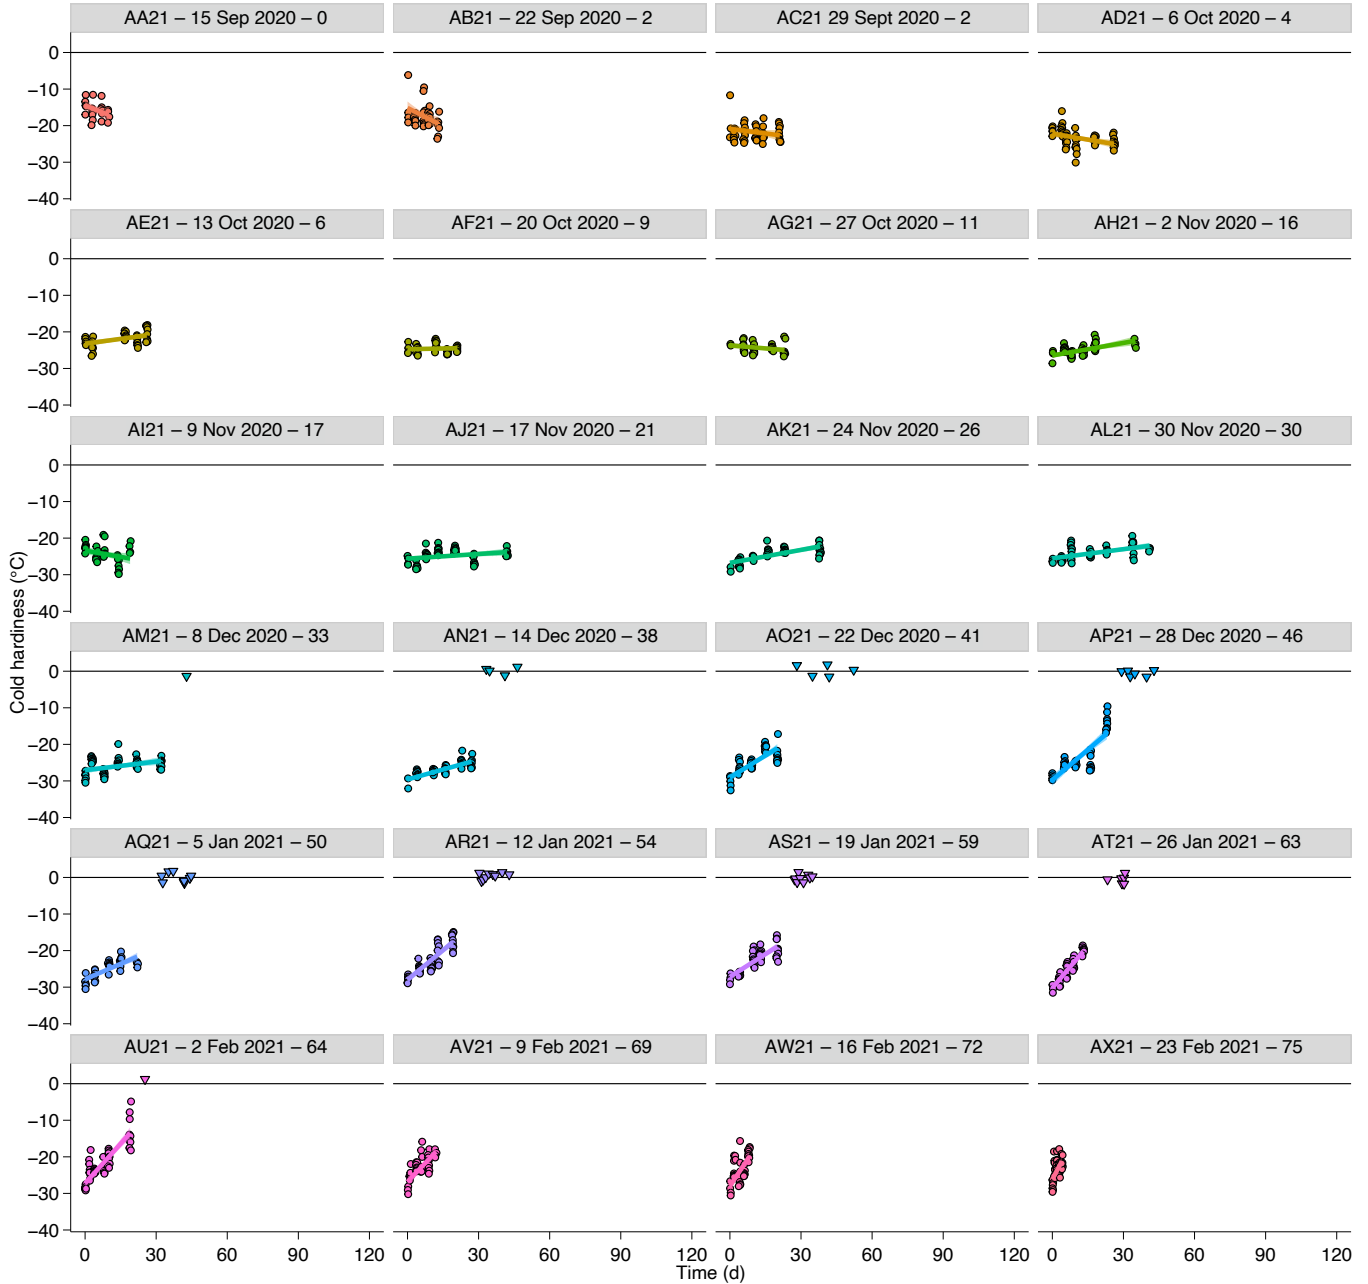

**Figure S34. Deacclimation and budbreak of *Abies balsamea* buds collected during the 2020-2021 dormant season.** Loss of cold hardiness (circles) and budbreak (upside down triangles at 0 °C line) for *Abies balsamea*. Each graph is identified by collection name, date of collection, and chill accumulated in portions.

*Acer rubrum* – 2020-2021

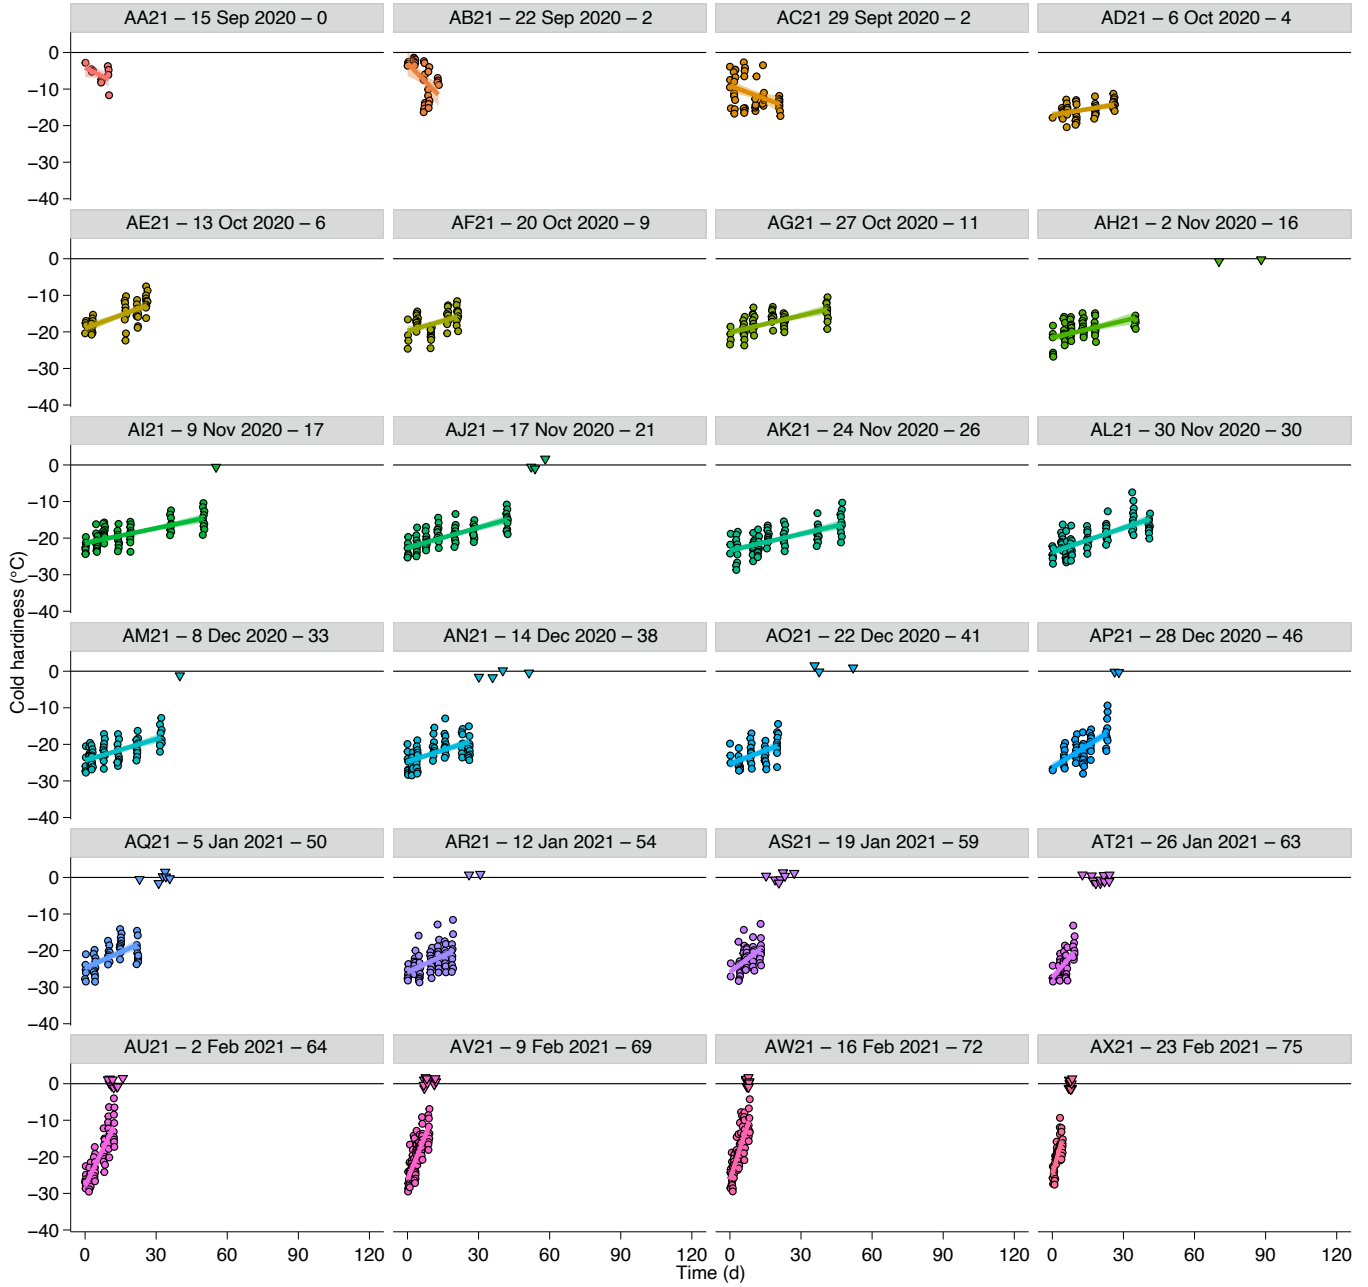

**Figure S35. Deacclimation and budbreak of *Acer rubrum* buds collected during the 2020-2021 dormant season.** Loss of cold hardiness (circles) and budbreak (upside down triangles at 0 °C line) for *Acer rubrum*. Each graph is identified by collection name, date of collection, and chill accumulated in portions.

*Acer saccharum* – 2020-2021

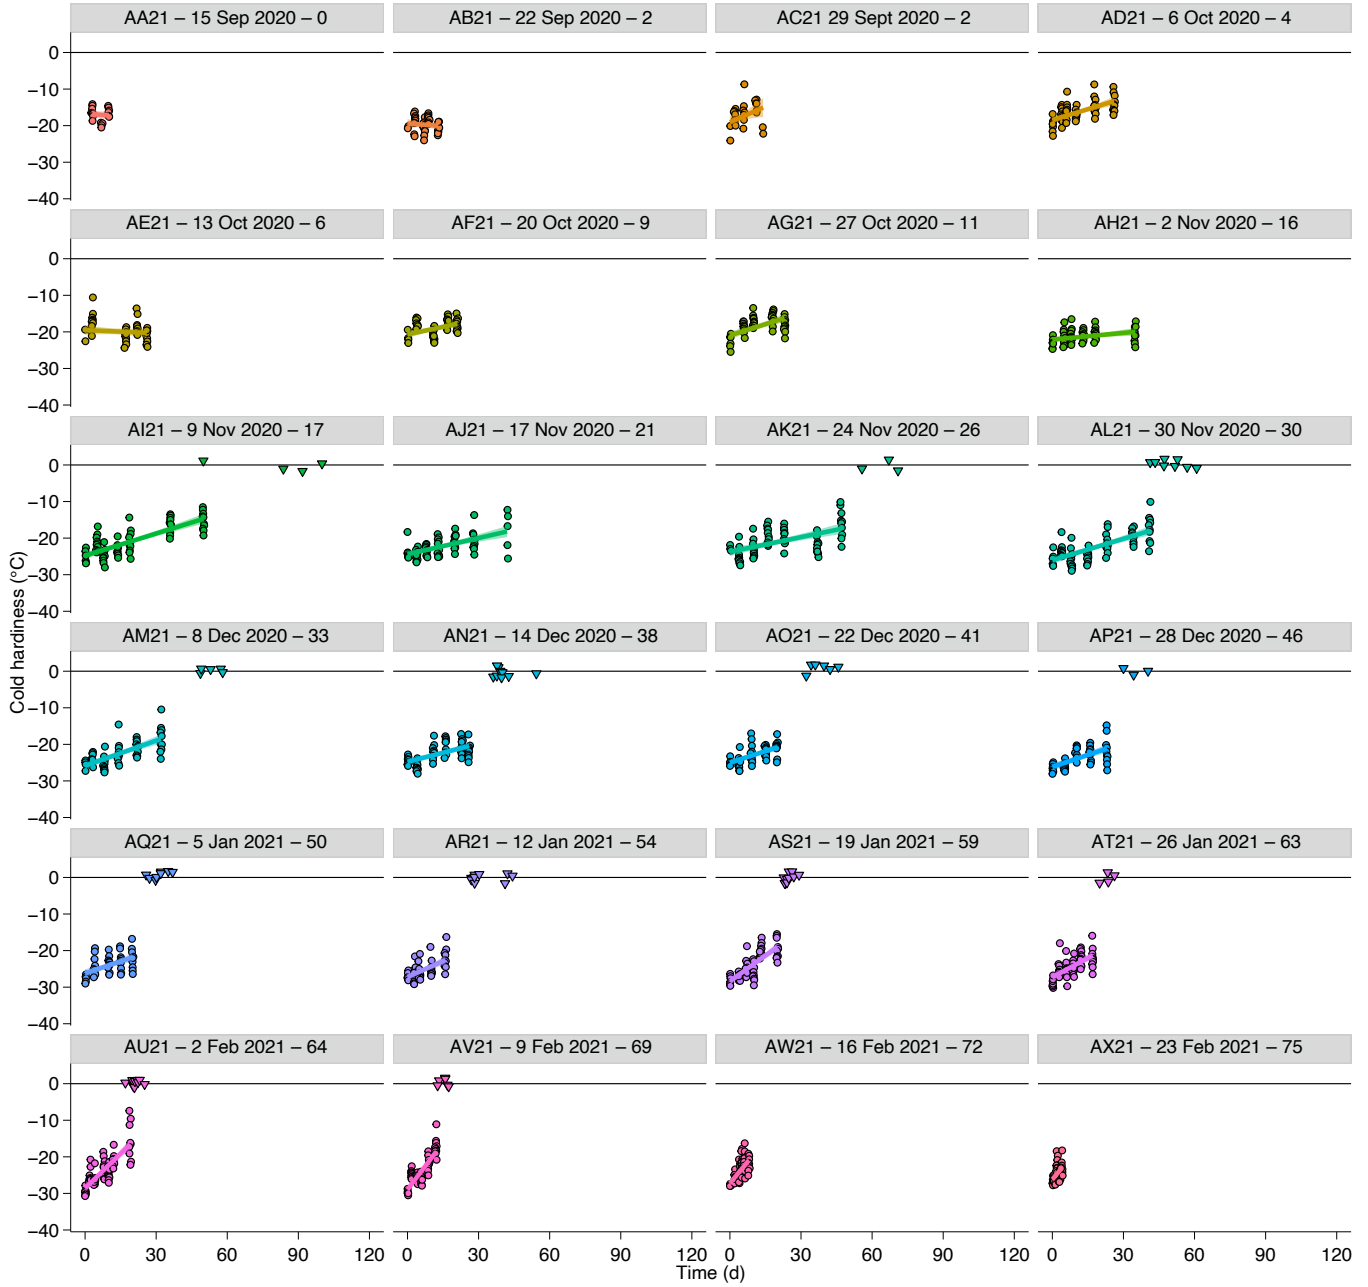

**Figure S36. Deacclimation and budbreak of *Acer saccharum* buds collected during the 2020-2021 dormant season.** Loss of cold hardiness (circles) and budbreak (upside down triangles at 0 °C line) for *Acer saccharum*. Each graph is identified by collection name, date of collection, and chill accumulated in portions.

*Cercis canadensis* – 2020-2021

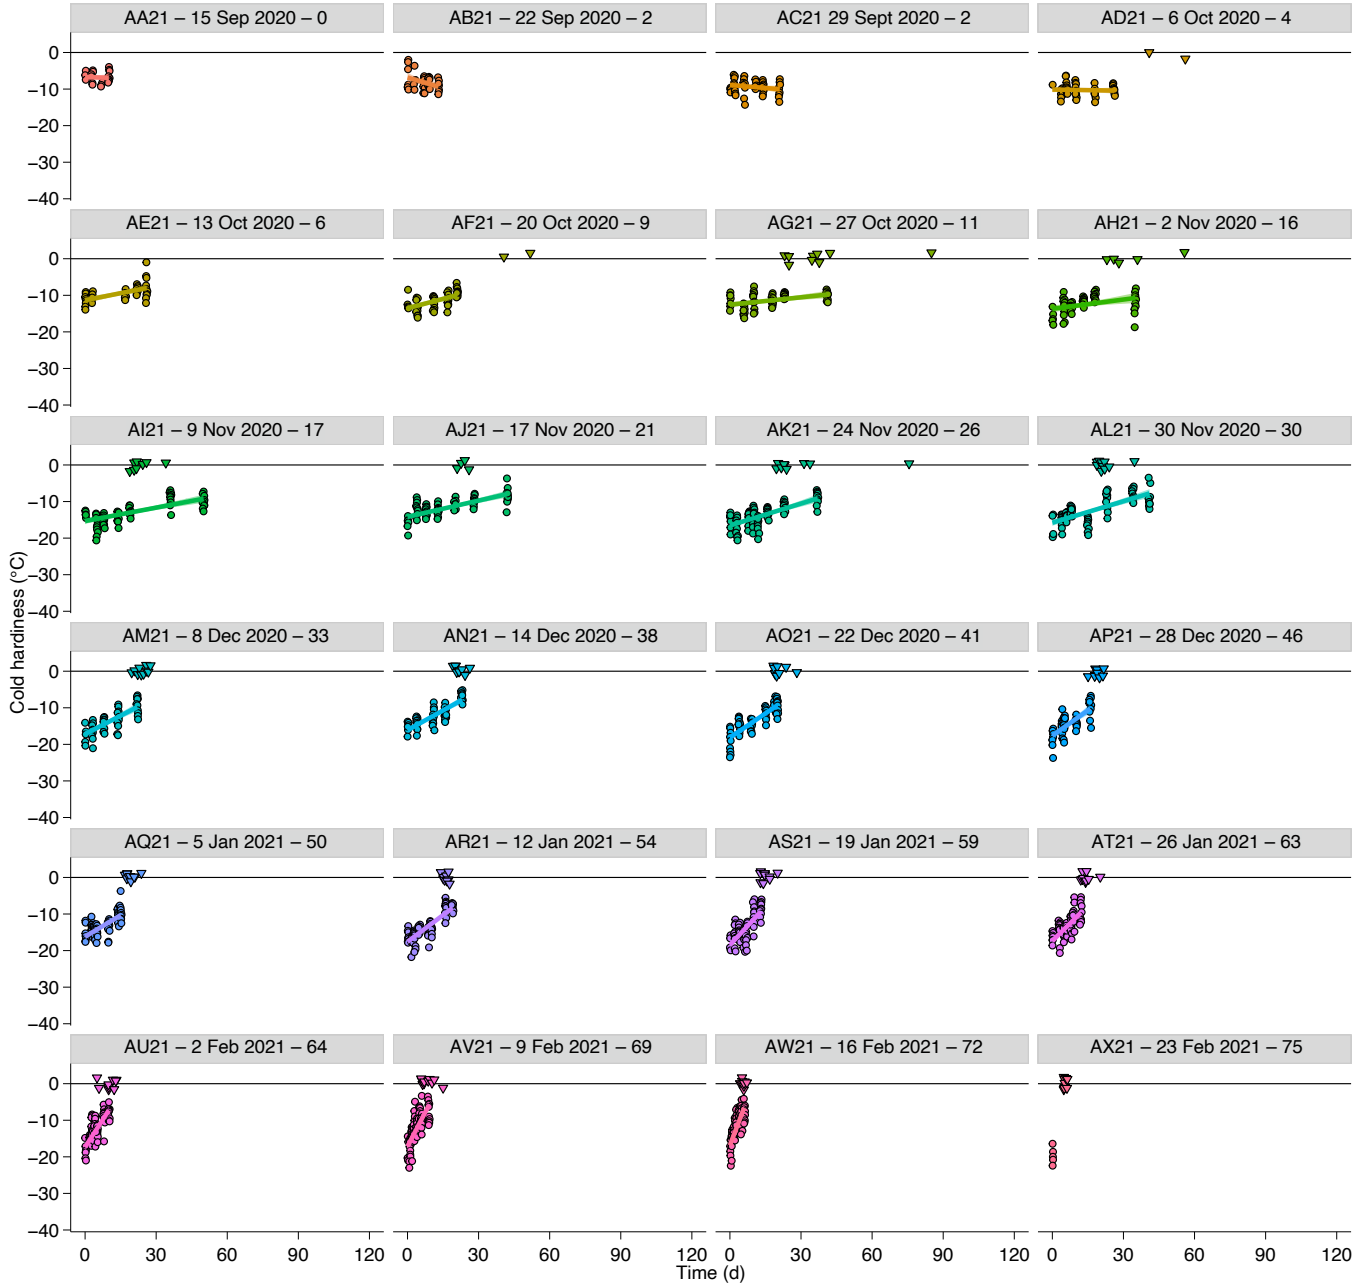

**Figure S37. Deacclimation and budbreak of *Cercis canadensis* buds collected during the 2020-2021 dormant season.** Loss of cold hardiness (circles) and budbreak (upside down triangles at 0 °C line) for *Cercis canadensis*. Each graph is identified by collection name, date of collection, and chill accumulated in portions.



*Cornus florida* – 2020-2021

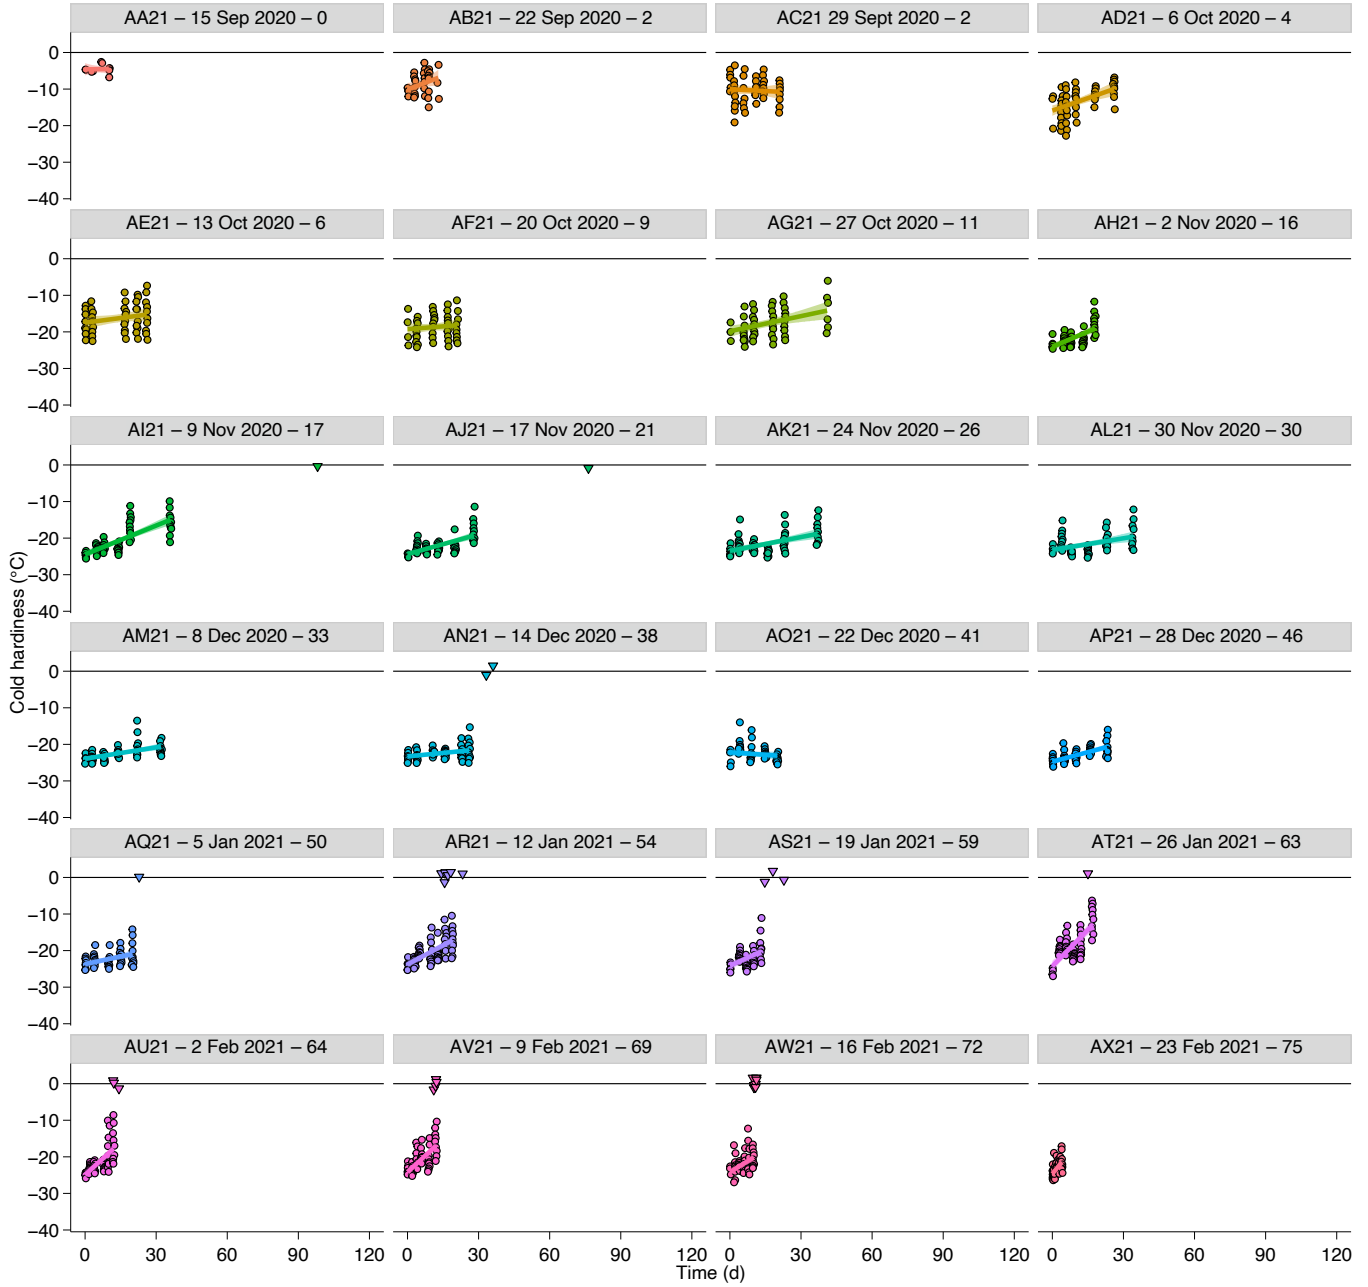

**Figure S38. Deacclimation and budbreak of *Cornus florida* buds collected during the 2020-2021 dormant season.** Loss of cold hardiness (circles) and budbreak (upside down triangles at 0 °C line) for *Cornus florida*. Each graph is identified by collection name, date of collection, and chill accumulated in portions.

*Cornus mas* – 2020-2021

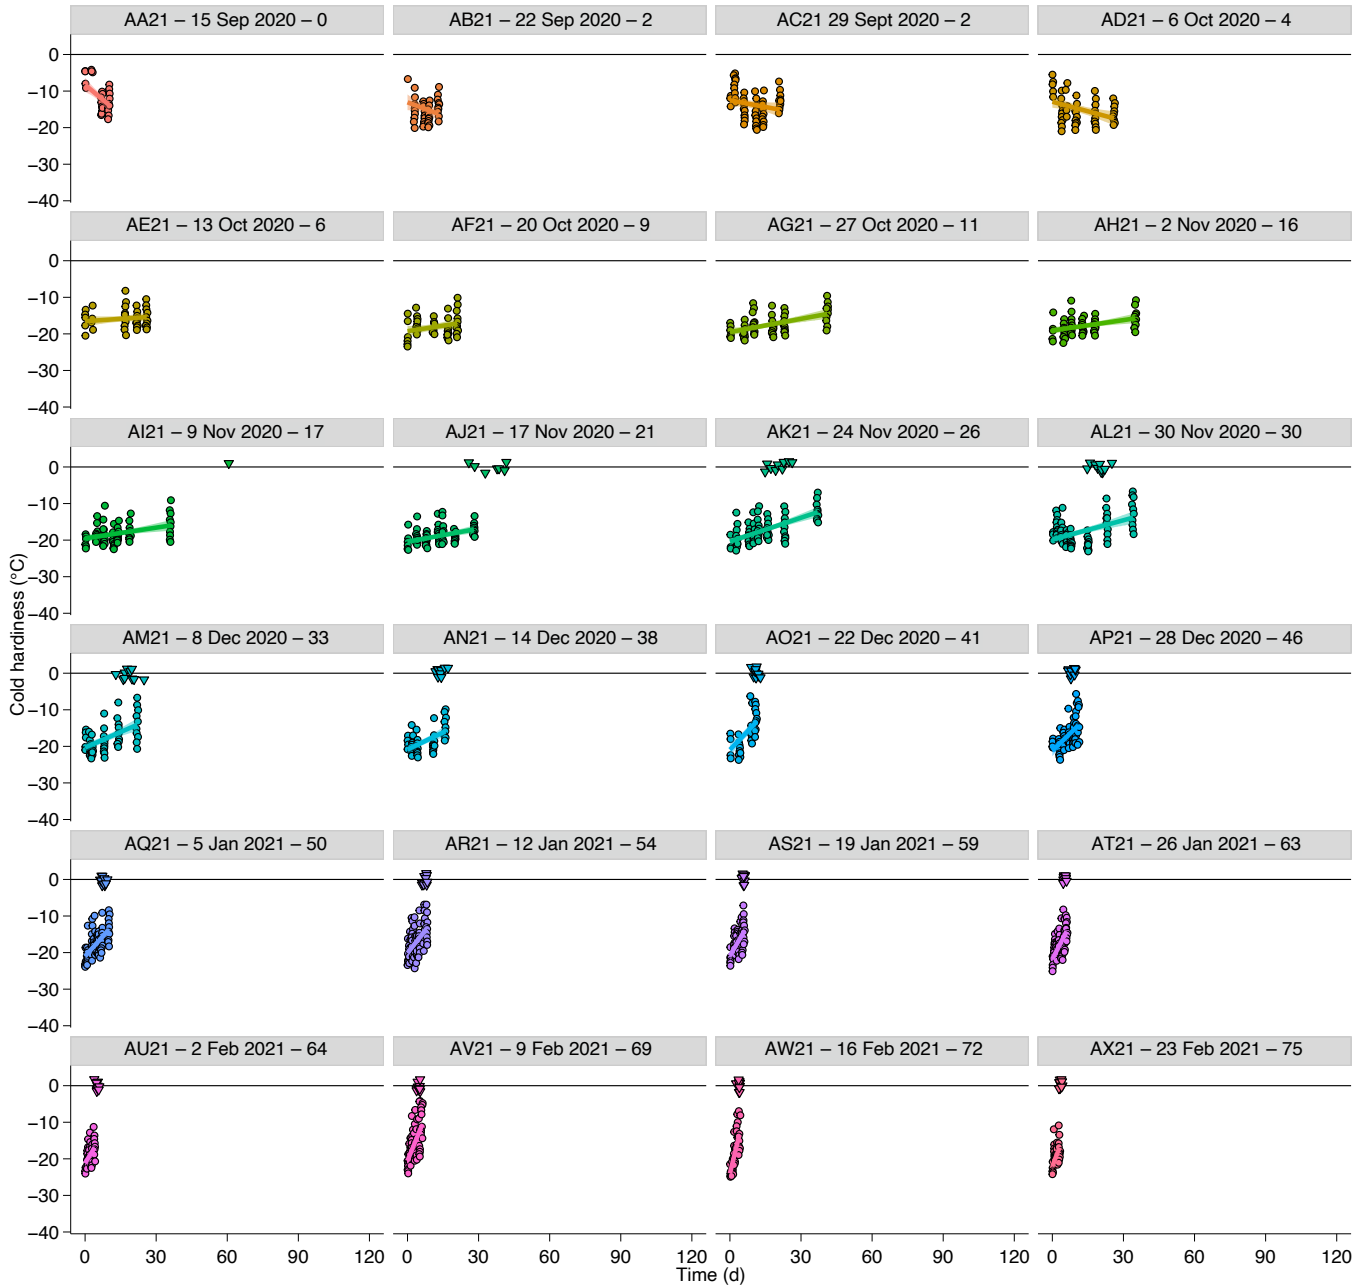

**Figure S39. Deacclimation and budbreak of *Cornus mas* buds collected during the 2020-2021 dormant season.** Loss of cold hardiness (circles) and budbreak (upside down triangles at 0 °C line) for *Cornus mas*. Each graph is identified by collection name, date of collection, and chill accumulated in portions.

*Fagus grandifolia* – 2020-2021

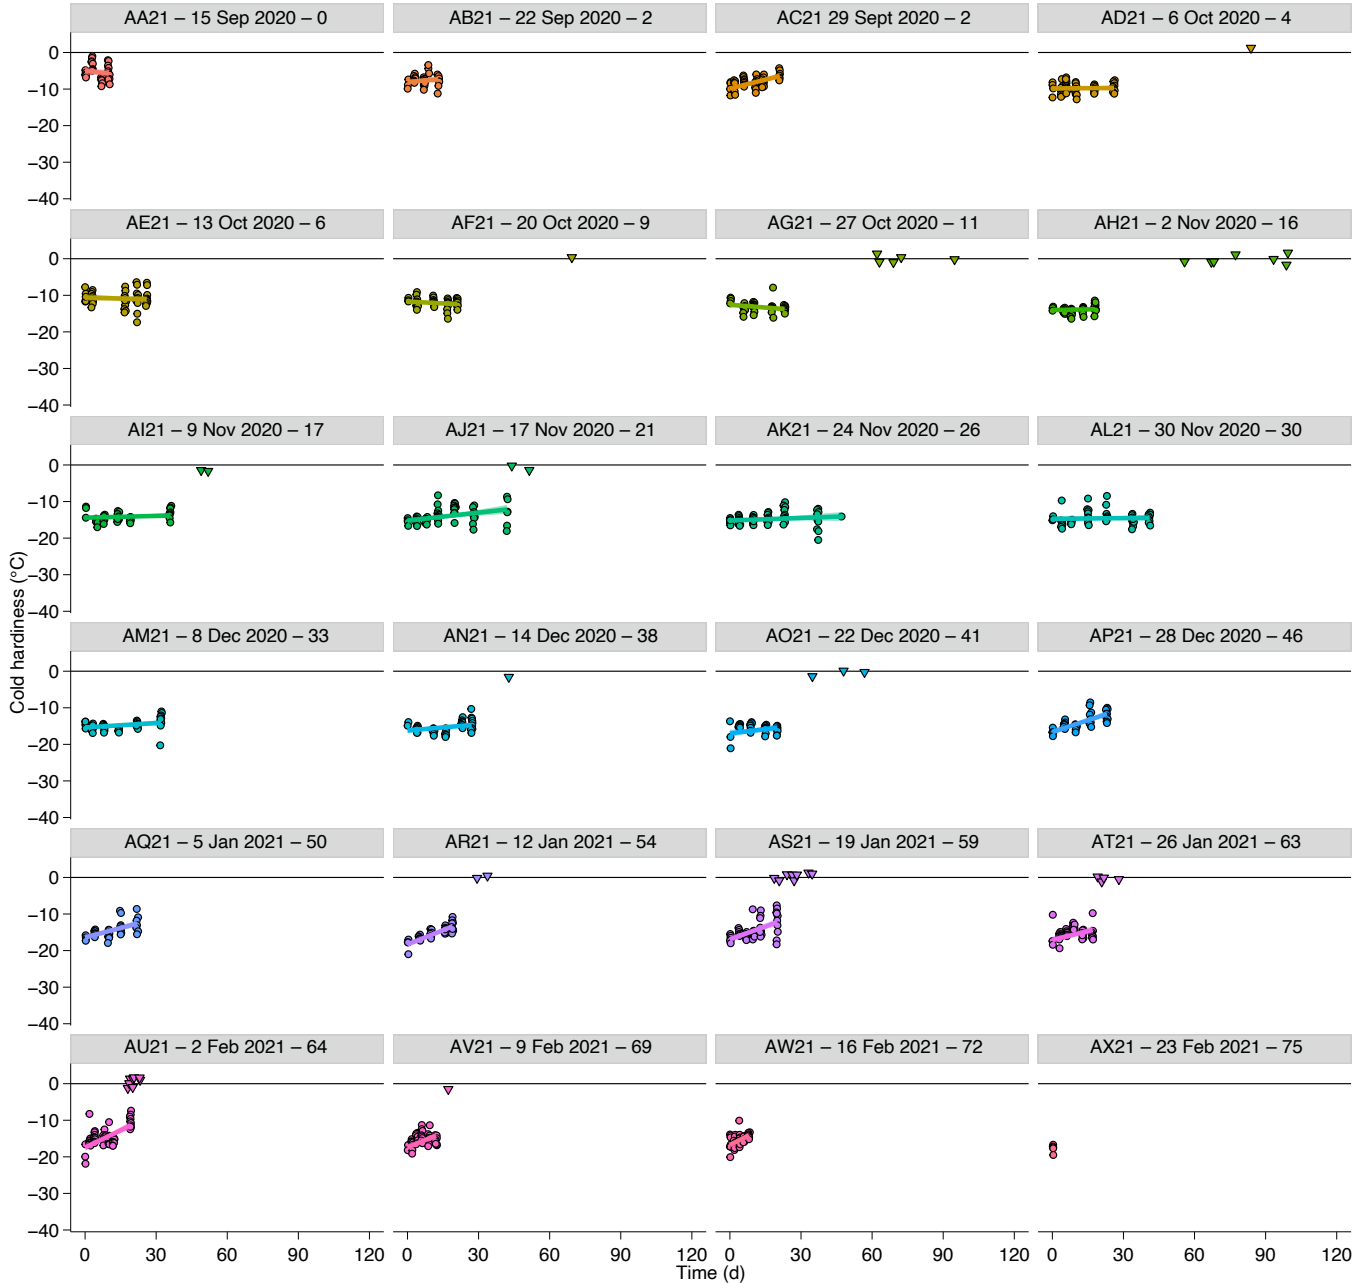

**Figure S40. Deacclimation and budbreak of *Fagus grandifolia* buds collected during the 2020-2021 dormant season.** Loss of cold hardiness (circles) and budbreak (upside down triangles at 0 °C line) for *Fagus grandifolia*. Each graph is identified by collection name, date of collection, and chill accumulated in portions.

*Forsythia* 'Meadowlark' – 2020-2021

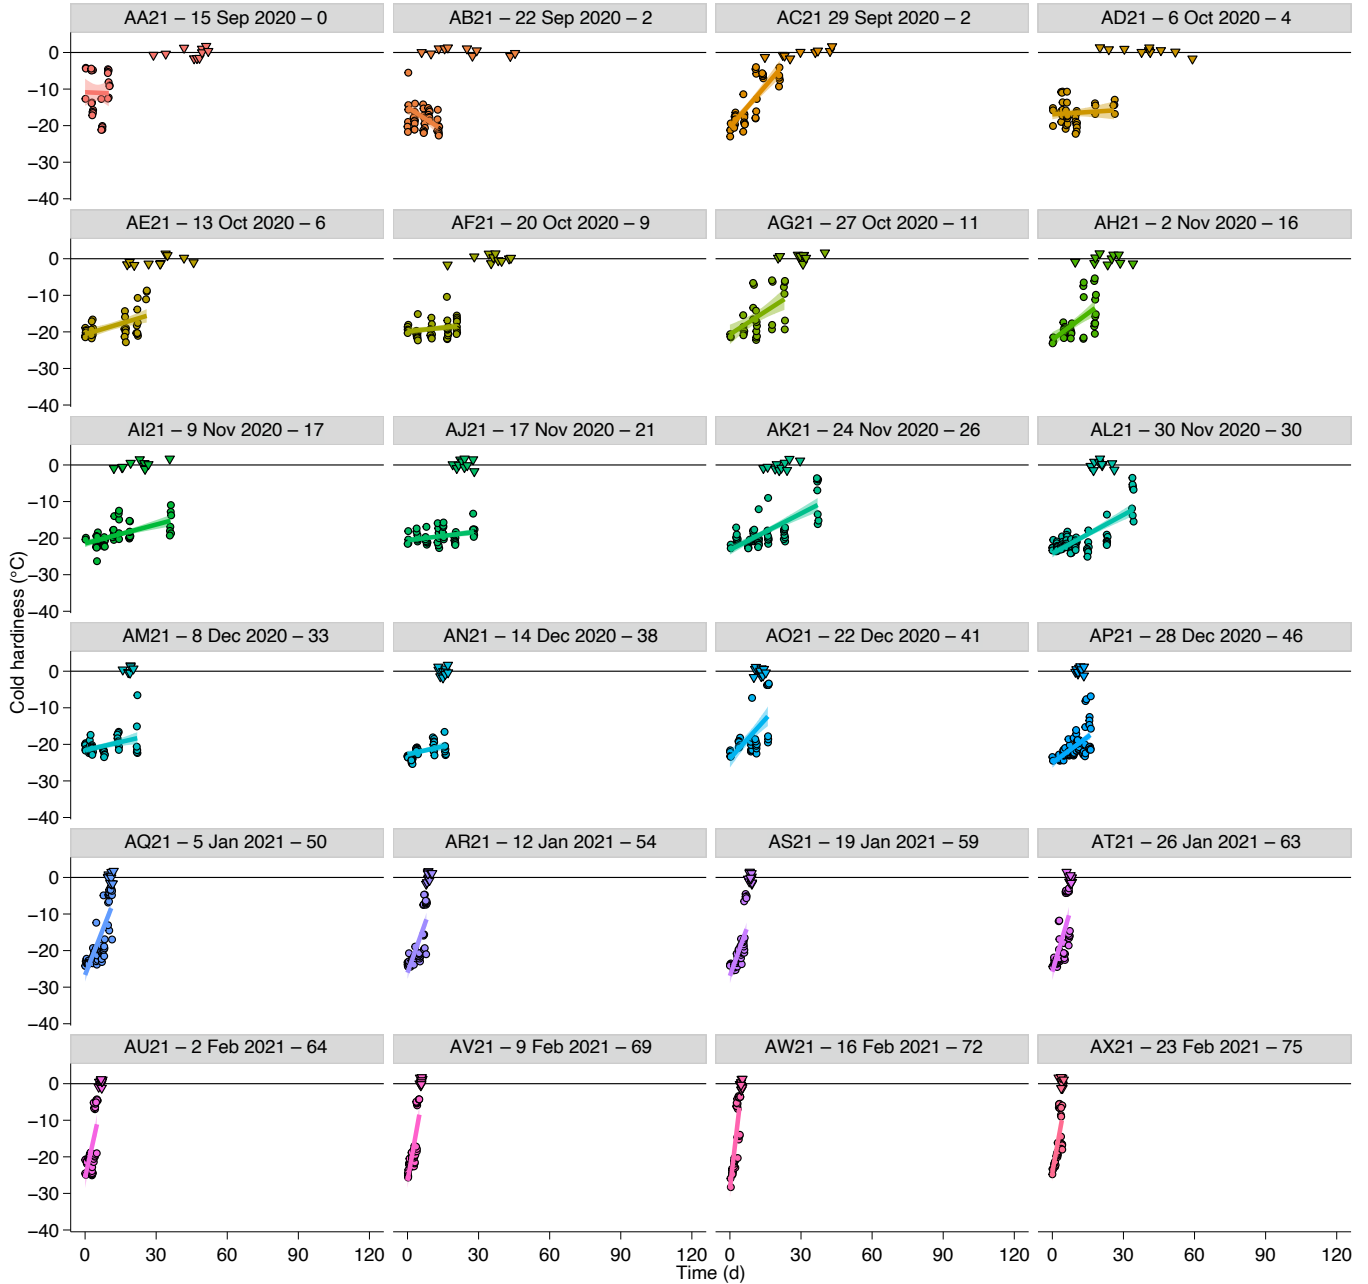

**Figure S41. Deacclimation and budbreak of *Forsythia* 'Meadowlark' buds collected during the 2020-2021 dormant season. Loss of cold hardiness (circles) and budbreak (upside down triangles at 0 °C line) for *Forsythia* 'Meadowlark'. Each graph is identified by collection name, date of collection, and chill accumulated in portions.**

*Kalmia latifolia* – 2020-2021

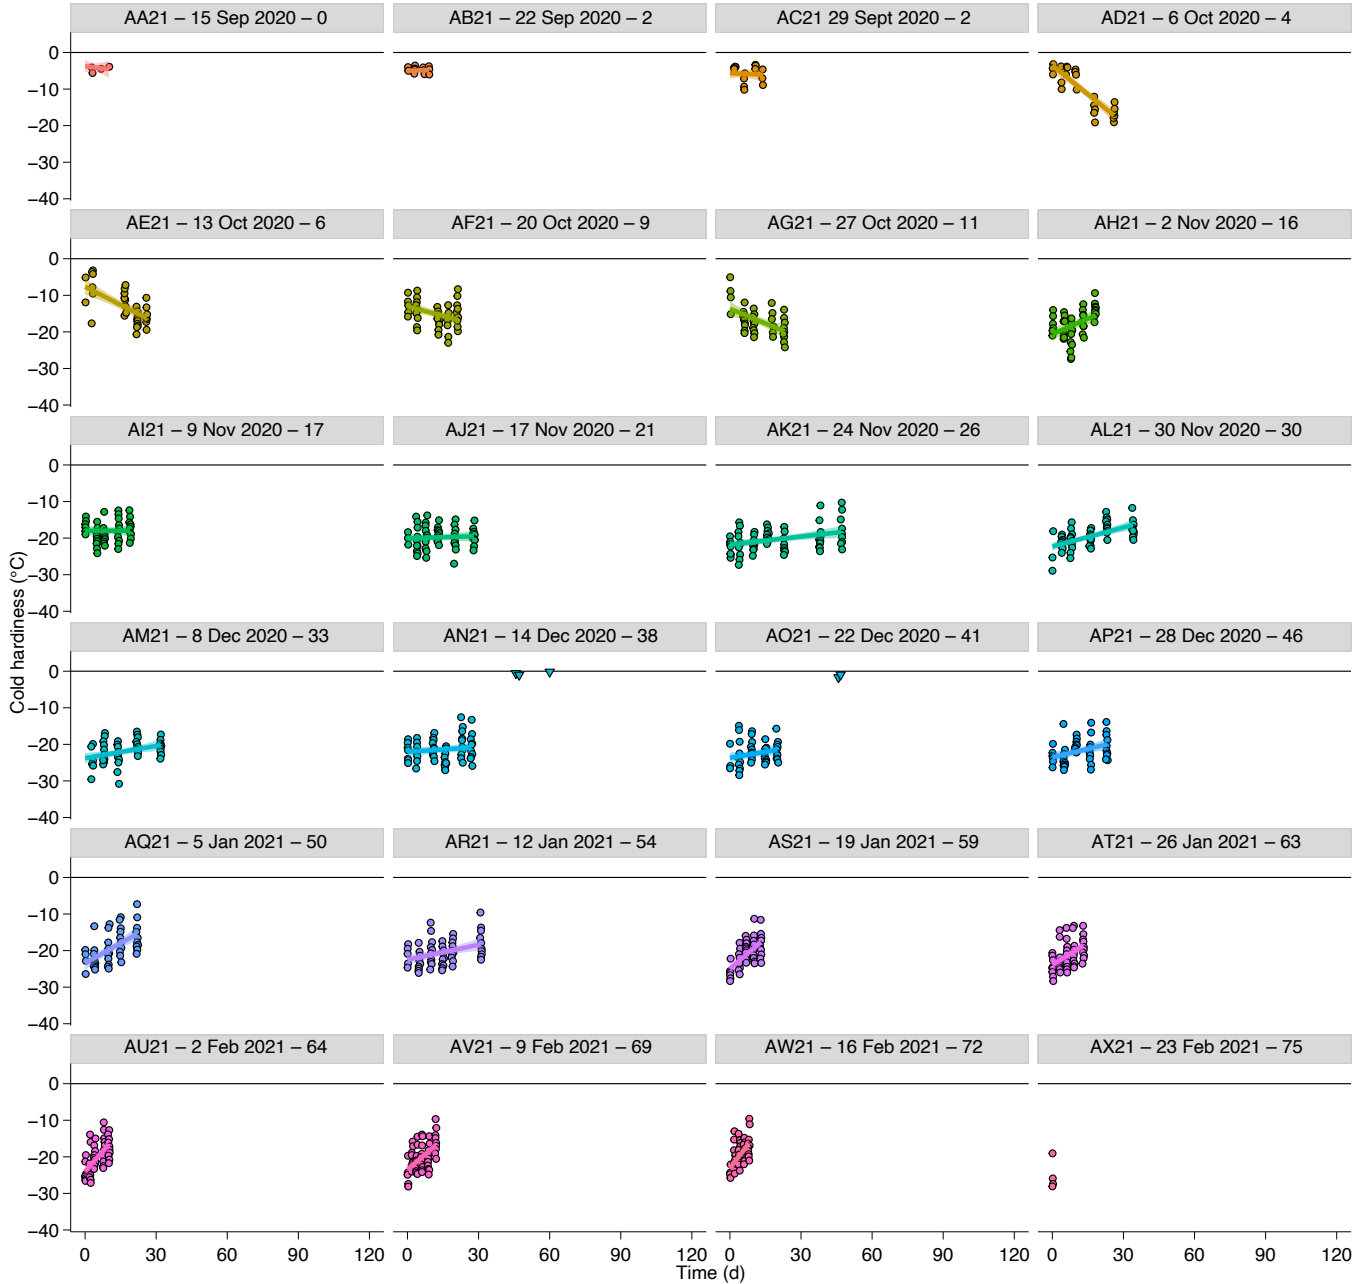

**Figure S42. Deacclimation and budbreak of *Kalmia latifolia* buds collected during the 2020-2021 dormant season.** Loss of cold hardiness (circles) and budbreak (upside down triangles at 0 °C line) for *Kalmia latifolia*. Each graph is identified by collection name, date of collection, and chill accumulated in portions.

*Larix kaempferi* – 2020-2021

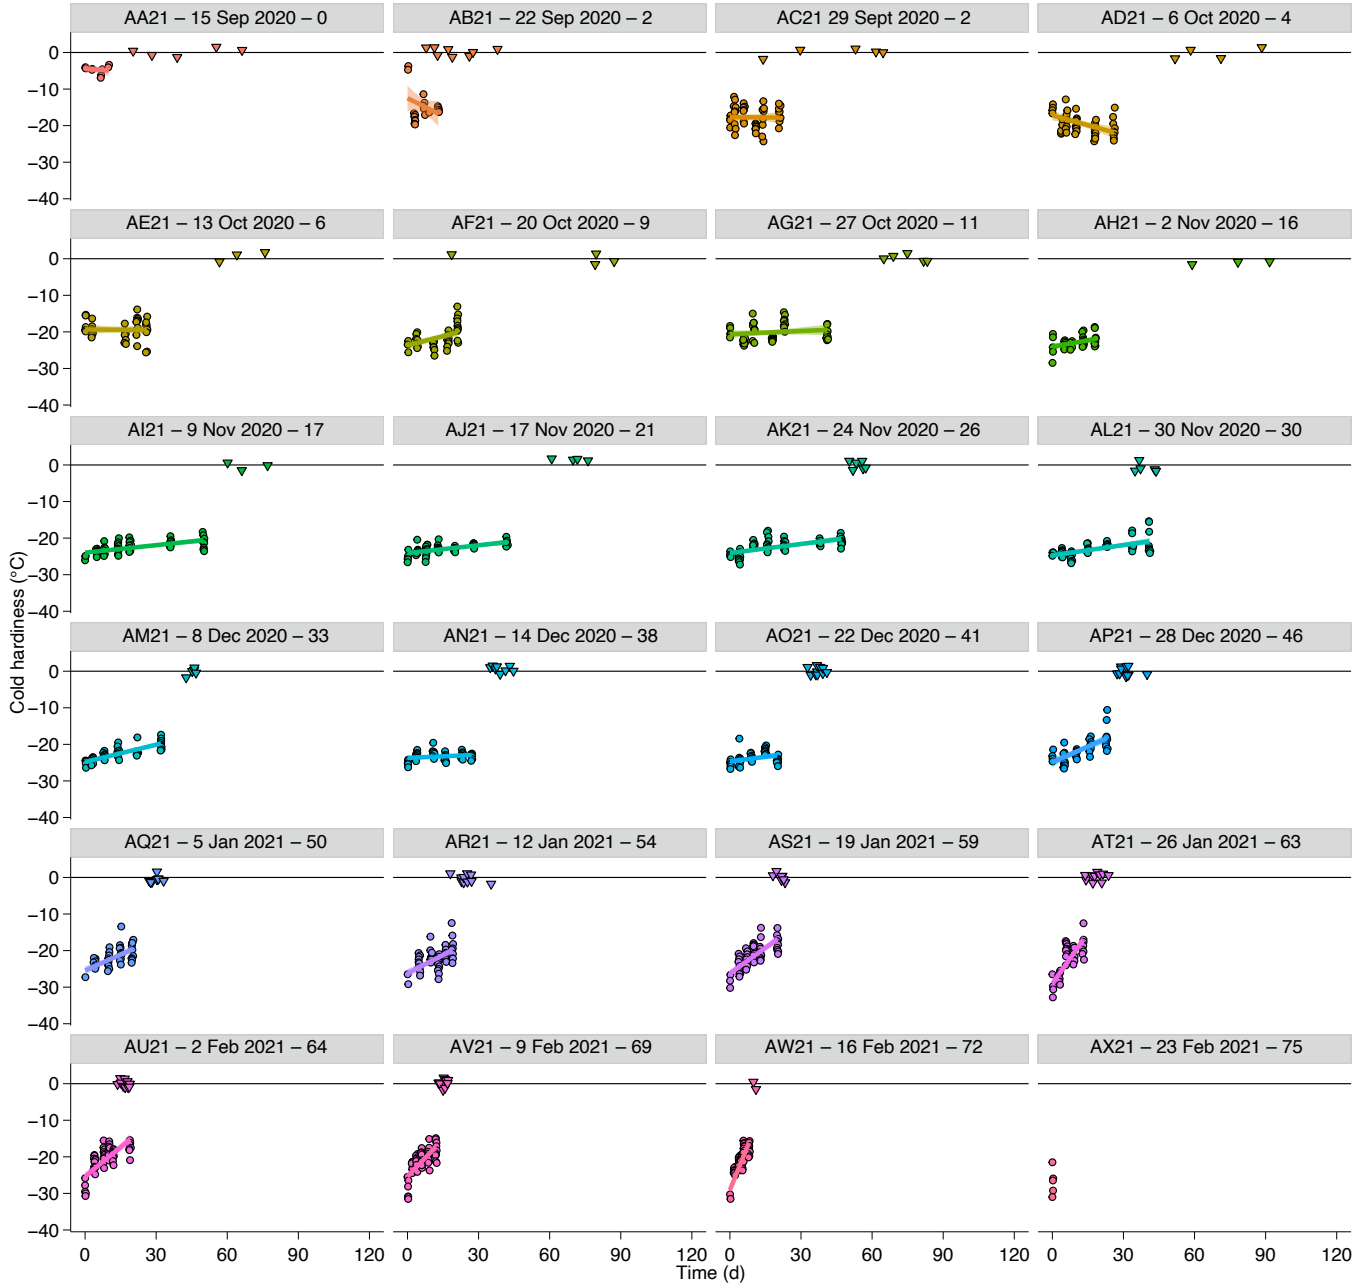

**Figure S43. Deacclimation and budbreak of *Larix kaempferi* buds collected during the 2020-2021 dormant season.** Loss of cold hardiness (circles) and budbreak (upside down triangles at 0 °C line) for *Larix kaempferi*. Each graph is identified by collection name, date of collection, and chill accumulated in portions.

*Metasequoia glyptostroboides* – 2020-2021

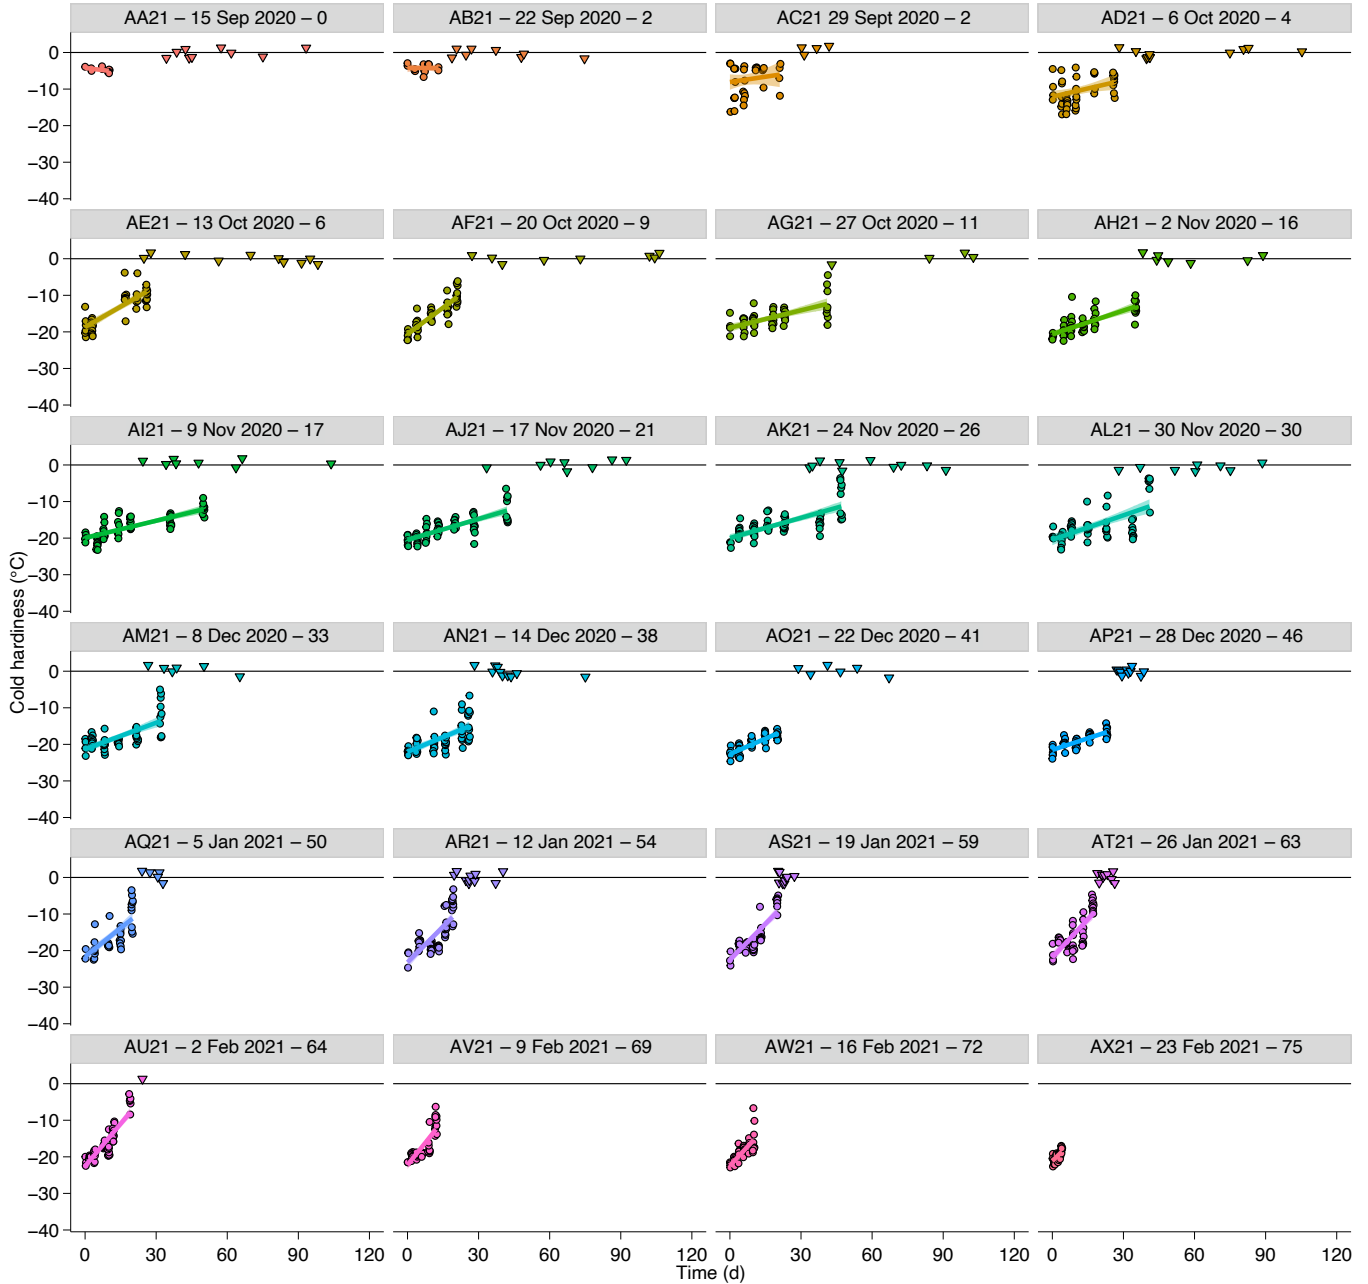

**Figure S44. Deacclimation and budbreak of *Metasequoia glyptostroboides* buds collected during the 2020-2021 dormant season.** Loss of cold hardiness (circles) and budbreak (upside down triangles at 0 °C line) for *Metasequoia glyptostroboides*. Each graph is identified by collection name, date of collection, and chill accumulated in portions.

*Picea abies* – 2020-2021

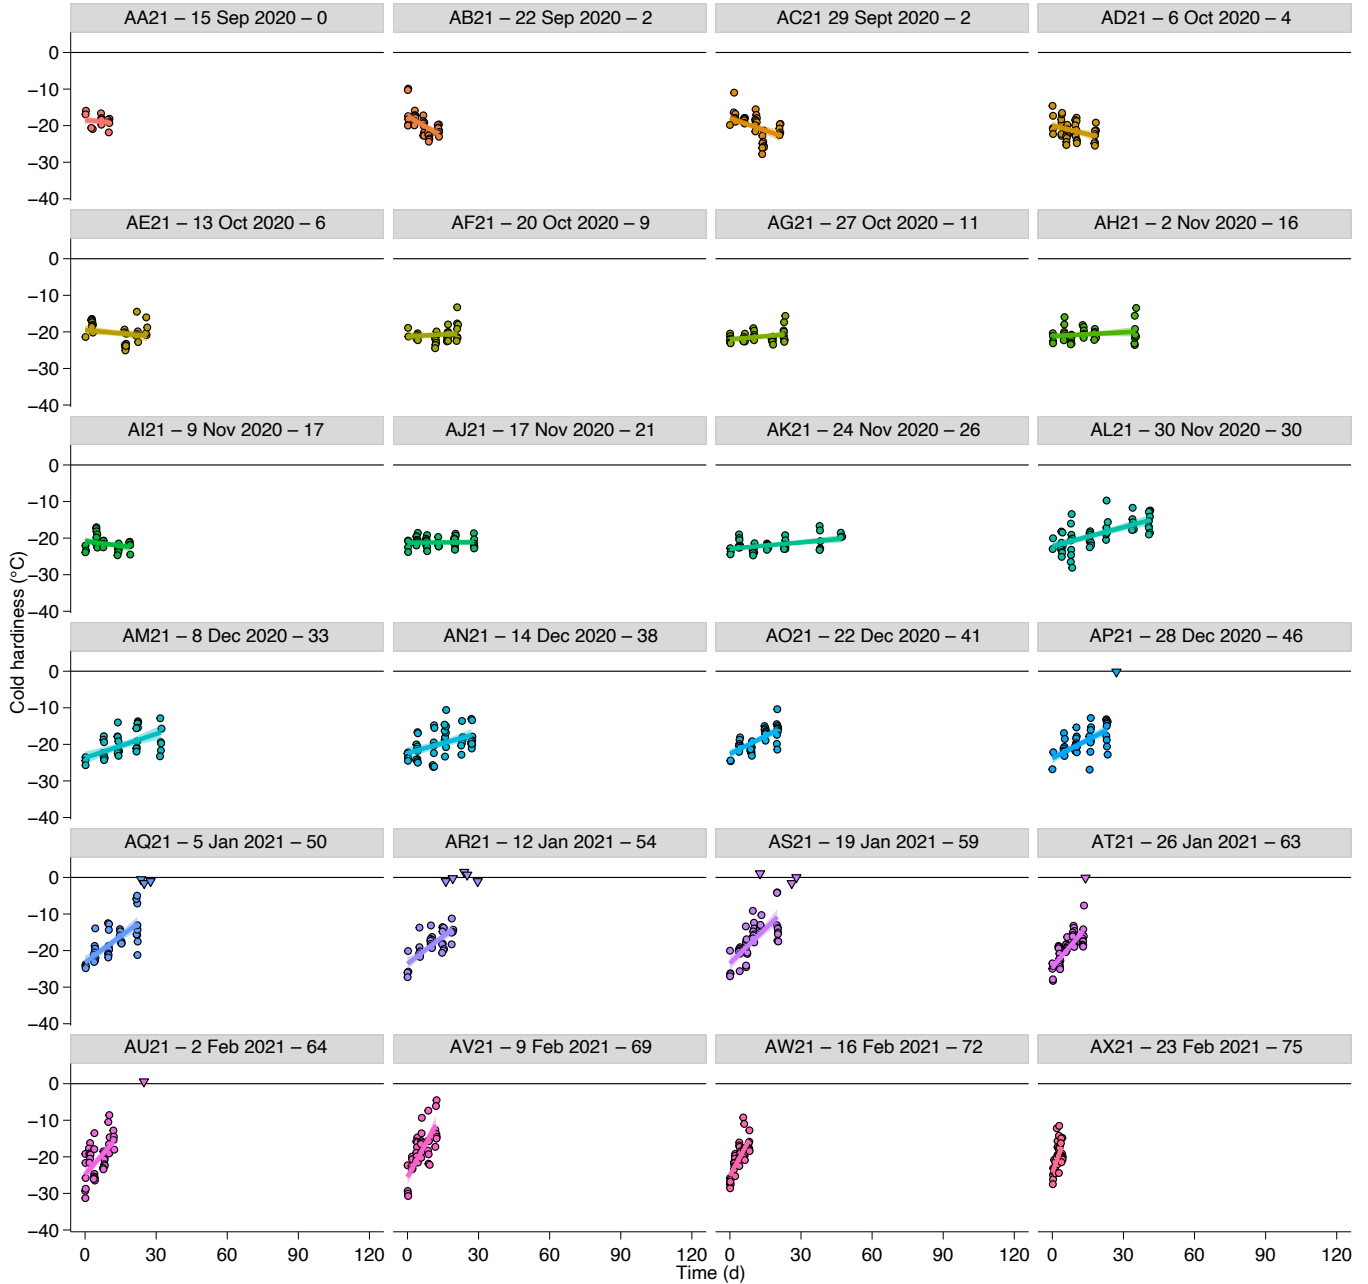

**Figure S45. Deacclimation and budbreak of *Picea abies* buds collected during the 2020-2021 dormant season.** Loss of cold hardiness (circles) and budbreak (upside down triangles at 0 °C line) for *Picea abies*. Each graph is identified by collection name, date of collection, and chill accumulated in portions.



*Prunus armeniaca* – 2020-2021

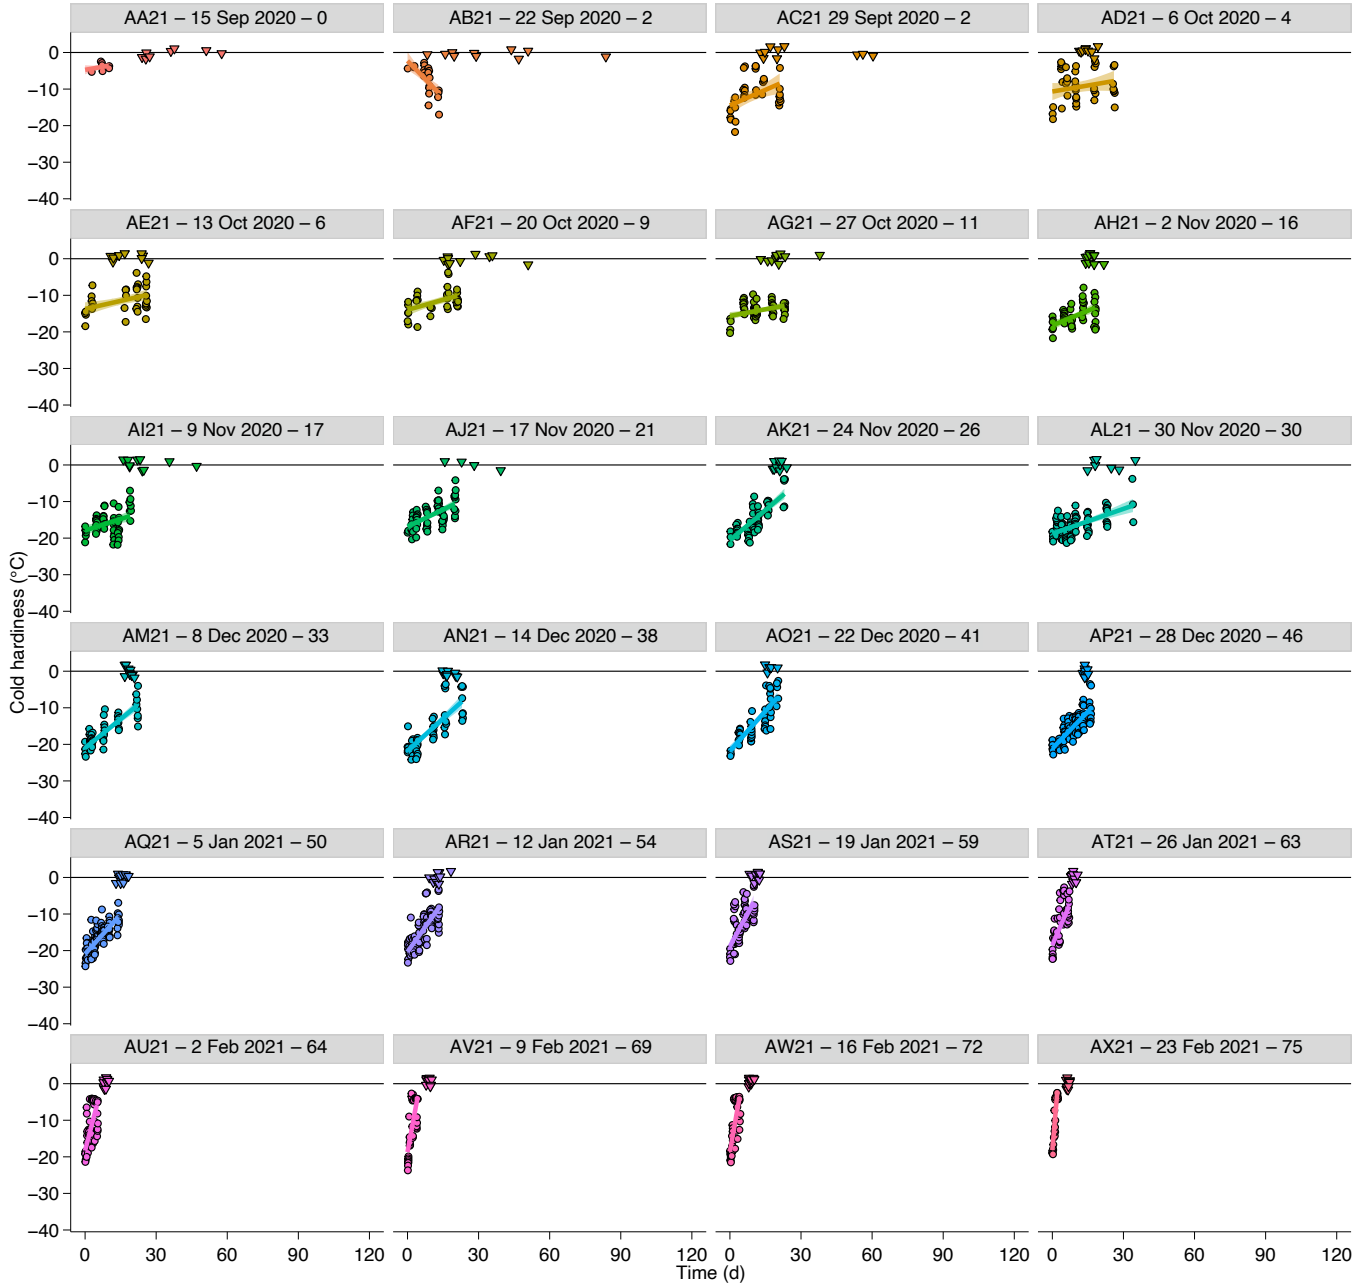

**Figure S46. Deacclimation and budbreak of *Prunus armeniaca* buds collected during the 2020-2021 dormant season.** Loss of cold hardiness (circles) and budbreak (upside down triangles at 0 °C line) for *Prunus armeniaca*. Each graph is identified by collection name, date of collection, and chill accumulated in portions.

*Prunus nigra* – 2020-2021

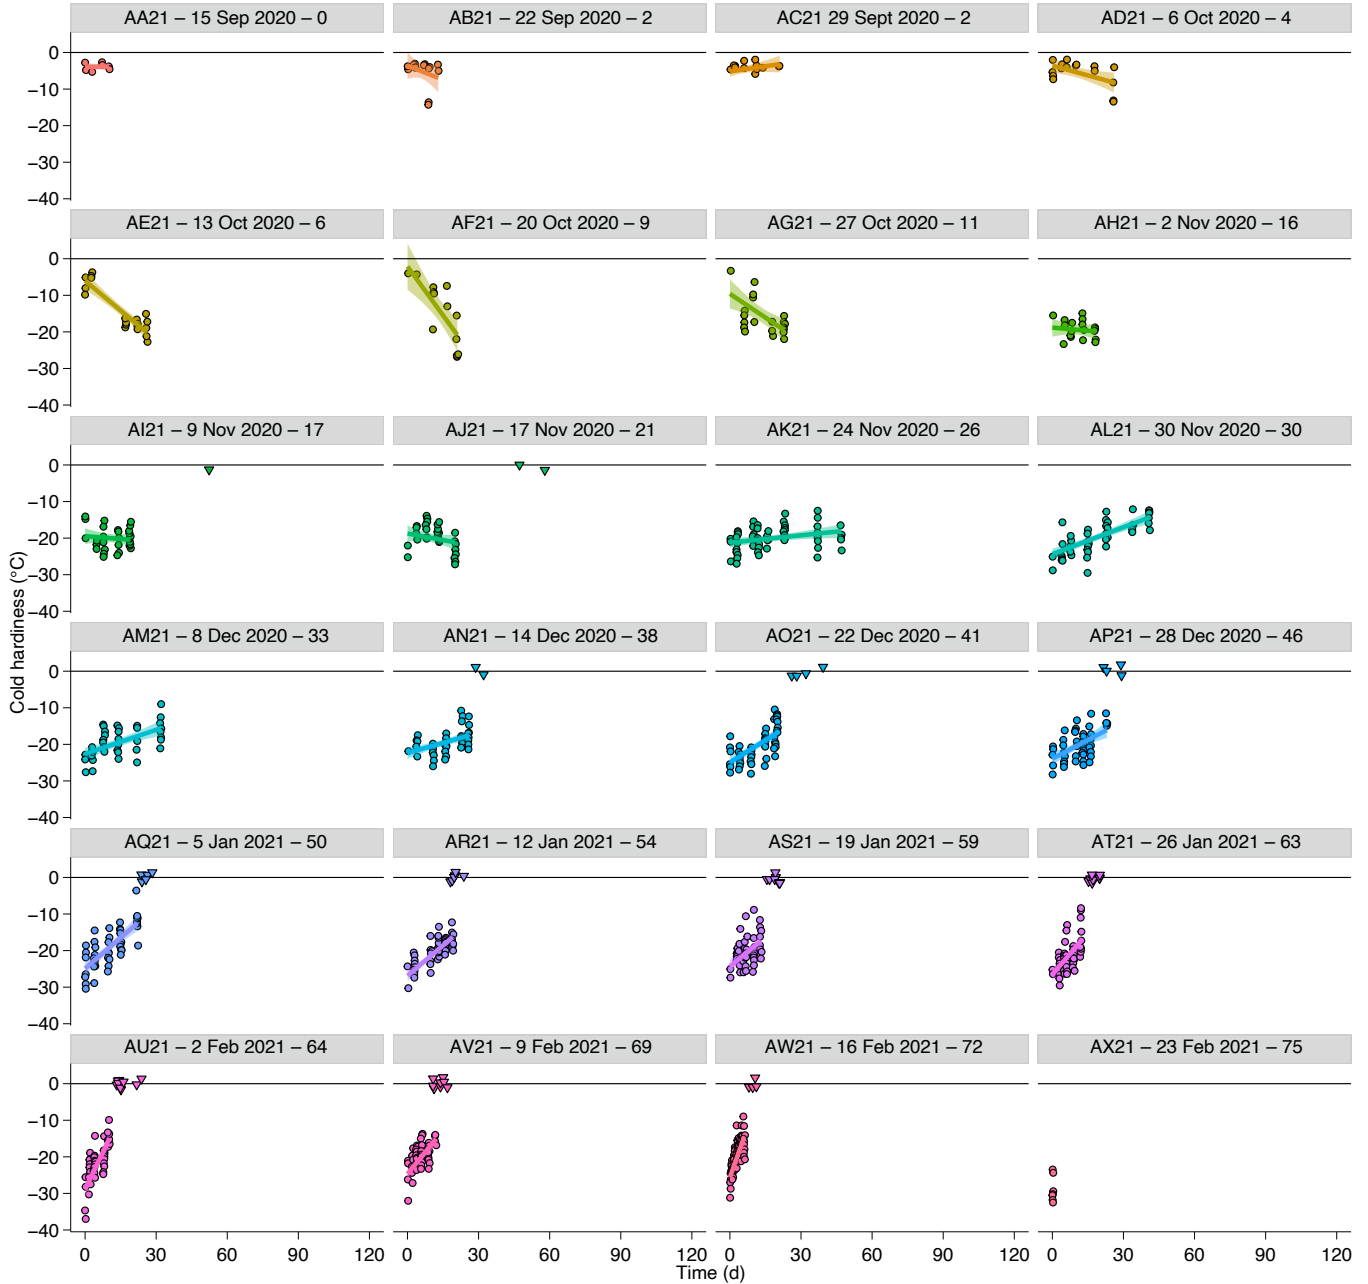

**Figure S47.** Deacclimation and budbreak of *Prunus nigra* buds collected during the 2020-2021 dormant season. Loss of cold hardiness (circles) and budbreak (upside down triangles at 0 °C line) for *Prunus nigra*. Each graph is identified by collection name, date of collection, and chill accumulated in portions.

*Rhododendron calendulaceum*– 2020-2021

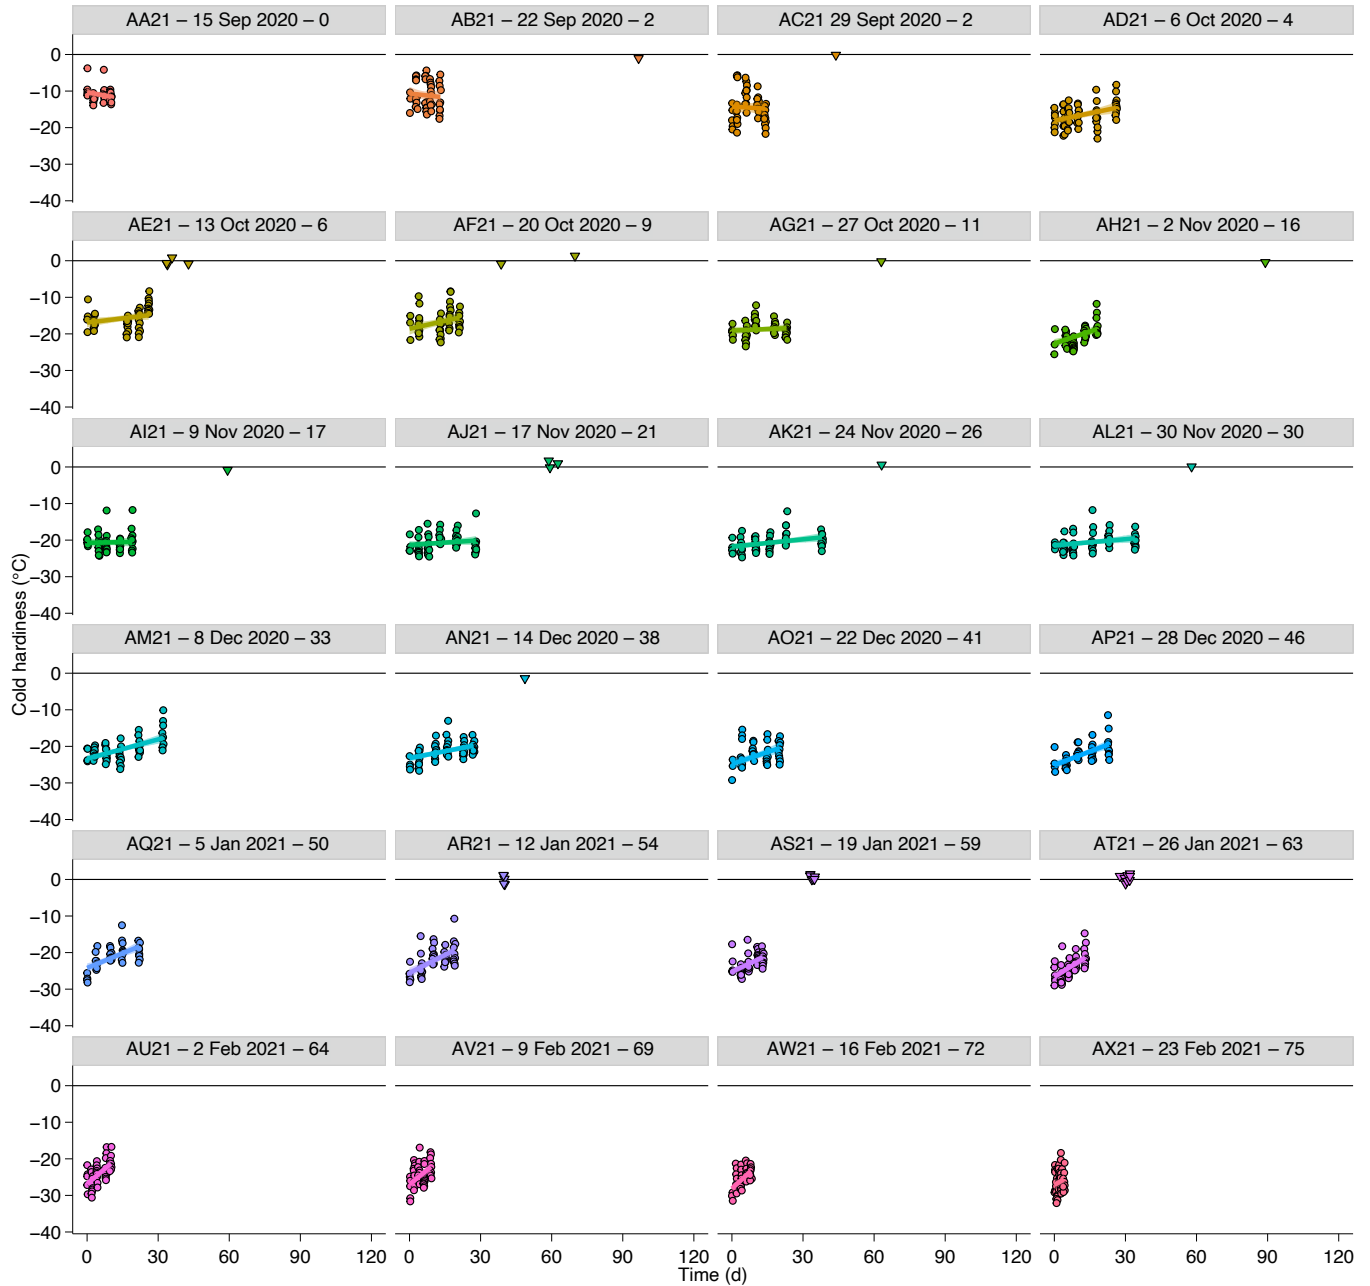

**Figure S48. Deacclimation and budbreak of *Rhododendron calendulaceum* buds collected during the 2020-2021 dormant season.** Loss of cold hardiness (circles) and budbreak (upside down triangles at 0 °C line) for *Rhododendron calendulaceum*. Each graph is identified by collection name, date of collection, and chill accumulated in portions.

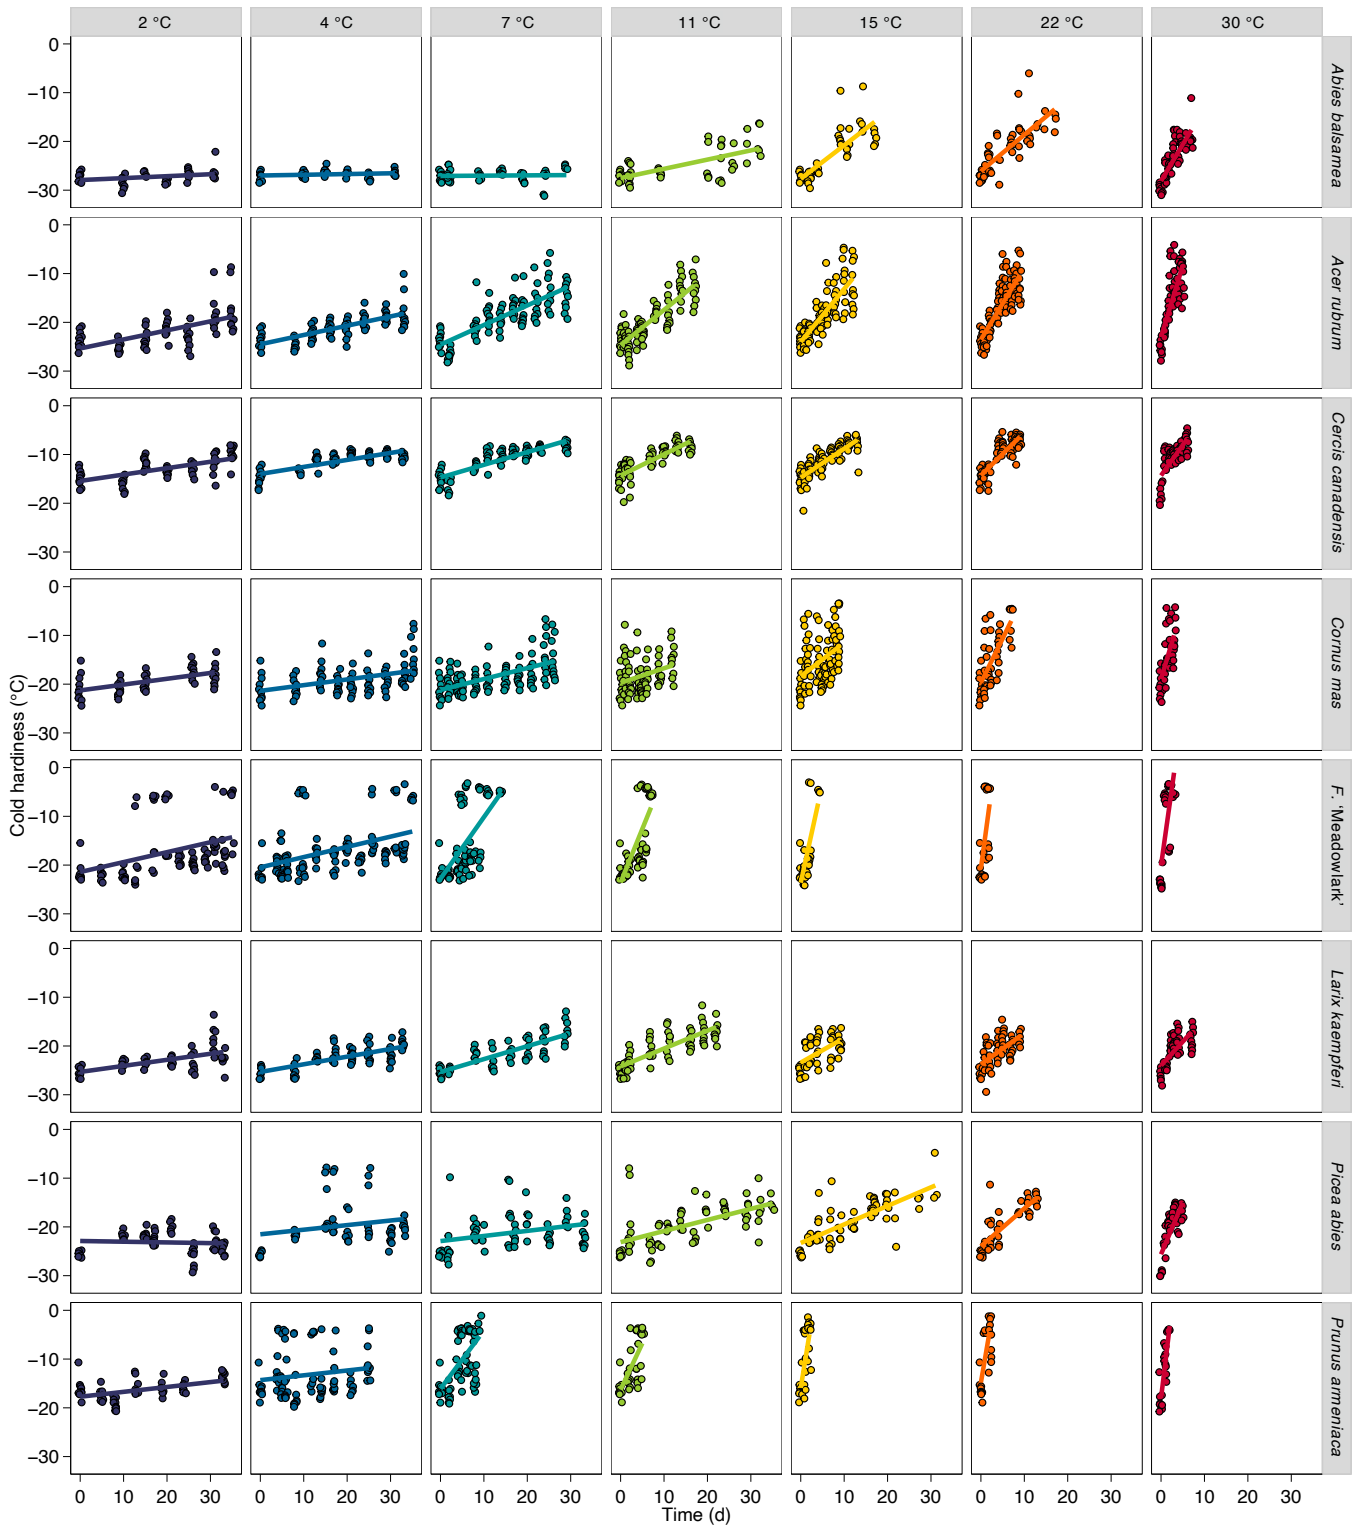

**Figure S49. Deacclimation at different temperatures.** Loss of cold hardiness over time of buds from eight species (rows) at seven different temperatures (columns), collected on 12 Feb 2020 (82 chill portions accumulated).

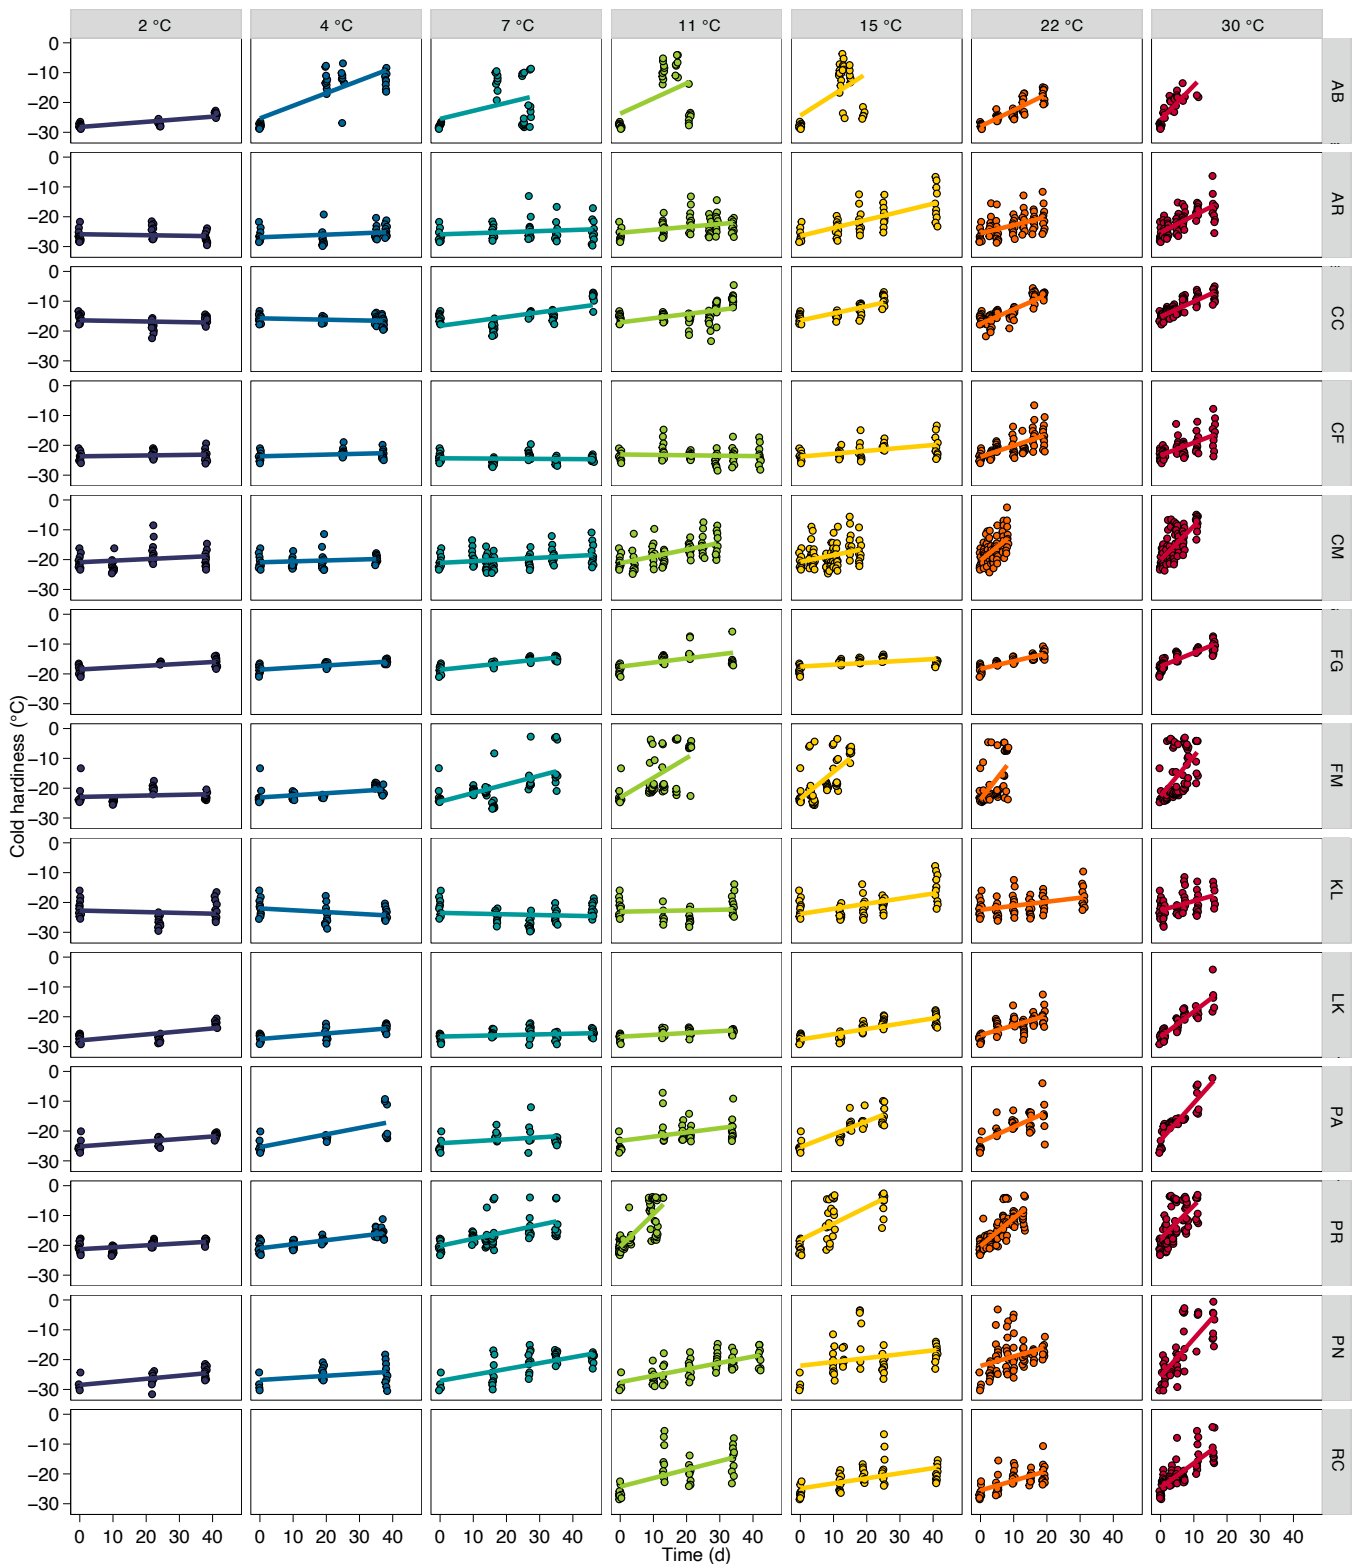

**Figure S50. Deacclimation at different temperatures.** Loss of cold hardiness over time of buds from nine species (rows) at seven different temperatures (columns), collected on 12 Jan 2021 (54 chill portions accumulated).

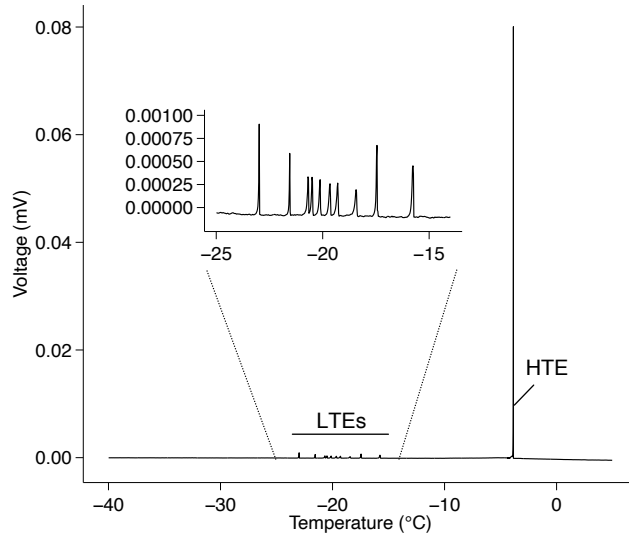

**Figure S51. Differential thermal analysis example.** Cooling down samples produces exotherms that are captured by thermoelectric modules as voltage peaks. A high temperature exotherm (HTE) occurs at high below freezing temperatures and is non-lethal. Peaks for low temperature exotherms (LTEs; shown in more detail within inset) are much smaller in size compared to HTE and represent lethal events. Here ten individual buds of *Forsythia* 'Meadowlark' had LTEs between  $-23.0^{\circ}\text{C}$  and  $-15.8^{\circ}\text{C}$  (these data pertain to collection AR20 after four days of deacclimation at  $22^{\circ}\text{C}$ ).

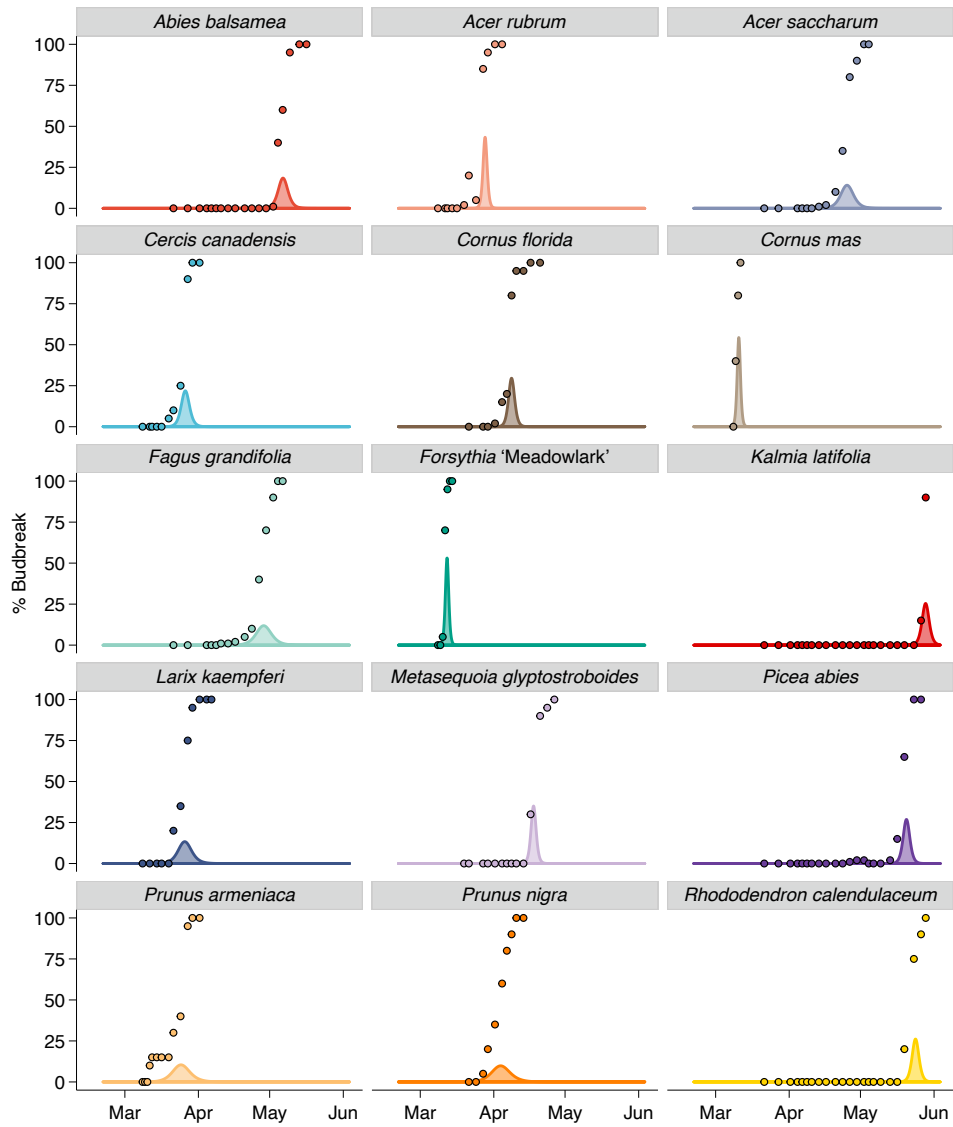

**Figure S52. Field budbreak.** Measured percent budbreak (circles) and density plots based on probability density function of as sigmoid response to time of different species at the Arnold Arboretum of Harvard University in the spring of 2020.

**Table S1. Description of species in this study.**

| Species                             | Abbreviation | Common name       | Accession                                       | Family       | Habit     | Bud observed <sup>†</sup> | Description of budbreak                                                                                                                | Total number of cold hardiness measurements |
|-------------------------------------|--------------|-------------------|-------------------------------------------------|--------------|-----------|---------------------------|----------------------------------------------------------------------------------------------------------------------------------------|---------------------------------------------|
| <i>Abies balsamea</i>               | AB           | Balsam Fir        | 610-93°C                                        | Pinaceae     | Evergreen | V                         | Bud scales separate and needle tips show                                                                                               | 3,003                                       |
| <i>Acer rubrum</i>                  | AR           | Red Maple         | 688-39*H                                        | Sapindaceae  | Deciduous | R                         | Flower bud opens                                                                                                                       | 3,286                                       |
| <i>Acer saccharum</i>               | AS           | Sugar Maple       | 655-93*G                                        | Sapindaceae  | Deciduous | V                         | Multiple bud scales separate and leaf tips are visible                                                                                 | 2,054                                       |
| <i>Cercis canadensis</i>            | CC           | Eastern Redbud    | 403-95*B                                        | Fabaceae     | Deciduous | R                         | Multiple bud scales separate and flower tips are visible                                                                               | 3,174                                       |
| <i>Cornus florida</i>               | CF           | Flowering Dogwood | 216-2014*A                                      | Cornaceae    | Deciduous | R                         | Two pairs of bud scales separate and flowers are visible                                                                               | 2,683                                       |
| <i>Cornus mas</i>                   | CM           | Cornelian-Cherry  | 645-79*A                                        | Cornaceae    | Deciduous | R                         | Two pairs of bud scales separate and flowers are visible                                                                               | 3,386                                       |
| <i>Fagus grandifolia</i>            | FG           | American Beech    | 6XX-2008*A                                      | Fagaceae     | Deciduous | V                         | Bud swells and scales fall to show leaves/flowers                                                                                      | 2,323                                       |
| <i>Forsythia x 'Meadowlark'</i>     | FM           | Forsythia         | 198-2007*MASS-A                                 | Oleaceae     | Deciduous | V/R                       | Flower bud elongates, points downwards and petals are visible and yellow. For vegetative, vegetative growth starts below a floral bud. | 2,904                                       |
| <i>Kalmia latifolia</i>             | KL           | Mountain Laurel   | 440-66*A;<br>150-58*A;<br>728-54*B;<br>728-54*D | Ericaceae    | Evergreen | R                         | Inflorescence elongates, at least one flower expands into "balloon" stage                                                              | 2,521                                       |
| <i>Larix kaempferi</i>              | LK           | Japanese Larch    | 11276*F                                         | Pinaceae     | Deciduous | V                         | Multiple bud scales separate and leaf tips are visible                                                                                 | 2,730                                       |
| <i>Metasequoia glyptostroboides</i> | MG           | Dawn Redwood      | 524-48*Z                                        | Cupressaceae | Deciduous | V                         | Multiple bud scales separate and leaf tips are visible                                                                                 | 2,541                                       |
| <i>Picea abies</i>                  | PA           | Norway Spruce     | 23026*M                                         | Pinaceae     | Evergreen | V                         | Multiple bud scales separate and leaf tips are visible                                                                                 | 2,652                                       |
| <i>Prunus armeniaca</i>             | PR           | Apricot           | 382-92*B                                        | Rosaceae     | Deciduous | V/R                       | Multiple bud scales separate; for reproductive, sepals open and petals are visible; for vegetative, leaf tips are visible.             | 2,829                                       |
| <i>Prunus nigra</i>                 | PN           | Canadian Plum     | 107-78*A                                        | Rosaceae     | Deciduous | V/R                       | Multiple bud scales separate; for reproductive, sepals open and petals are visible; for vegetative, leaf tips are visible.             | 1840                                        |
| <i>Rhododendron calendulaceum</i>   | RC           | Flame Azalea      | 17759*A; 656-70*MASS;<br>19483*MASS             | Ericaceae    | Deciduous | R                         | Multiple bud scales separate and flower tips are visible                                                                               | 2630                                        |

<sup>†</sup>V – Vegetative; R – Reproductive.



**Table S2. Details on field collections.**

| 2019-2020  |                    |                            |                                  | 2020-2021  |                    |                            |                                  |
|------------|--------------------|----------------------------|----------------------------------|------------|--------------------|----------------------------|----------------------------------|
| Collection | Date of Collection | Chill portions accumulated | Deacclimation and budbreak assay | Collection | Date of Collection | Chill portions accumulated | Deacclimation and budbreak assay |
| AA20       | 16 Sep 2019        | 1                          | x                                | AA21       | 15 Sep 2020        | 0                          | x                                |
| AB20       | 23 Sep 2019        | 2                          | x                                | AB21       | 22 Sep 2020        | 2                          | x                                |
| AC20       | 30 Sep 2019        | 2                          | x                                | AC21       | 29 Sep 2020        | 2                          | x                                |
| AD20       | 6 Oct 2019         | 4                          | x                                | AD21       | 6 Oct 2020         | 4                          | x                                |
| AE20       | 14 Oct 2019        | 7                          | x                                | AE21       | 13 Oct 2020        | 6                          | x                                |
| AF20       | 21 Oct 2019        | 10                         | x                                | AF21       | 20 Oct 2020        | 9                          | x                                |
| AG20       | 28 Oct 2019        | 15                         | x                                | AG21       | 27 Oct 2020        | 11                         | x                                |
| AH20       | 4 Nov 2019         | 15                         | x                                | AH21       | 2 Nov 2020         | 16                         | x                                |
| AI20       | 10 Nov 2019        | 23                         | x                                | AI21       | 9 Nov 2020         | 17                         | x                                |
| AJ20       | 17 Nov 2019        | 27                         | x                                | AJ21       | 17 Nov 2020        | 21                         | x                                |
| AK20       | 25 Nov 2019        | 33                         | x                                | AK21       | 24 Nov 2020        | 26                         | x                                |
| AL20       | 2 Dec 2019         | 37                         | x                                | AL21       | 30 Nov 2020        | 30                         | x                                |
| AM20       | 8 Dec 2019         | 40                         | x                                | AM21       | 8 Dec 2020         | 33                         | x                                |
| AN20       | 16 Dec 2019        | 45                         | x                                | AN21       | 14 Dec 2020        | 38                         | x                                |
| AO20       | 23 Dec 2019        | 48                         | x                                | AO21       | 22 Dec 2020        | 41                         | x                                |
| AP20       | 30 Dec 2019        | 53                         | x                                | AP21       | 28 Dec 2020        | 46                         | x                                |
| AQ20       | 6 Jan 2020         | 58                         | x                                | AQ21       | 5 Jan 2021         | 50                         | x                                |
| AR20       | 12 Jan 2020        | 61                         | x                                | AR21       | 12 Jan 2021        | 54                         | x                                |
| AS20       | 19 Jan 2020        | 64                         | x                                | AS21       | 19 Jan 2021        | 59                         | x                                |
| AT20       | 26 Jan 2020        | 70                         | x                                | AT21       | 26 Jan 2021        | 63                         | x                                |
| AU20       | 2 Feb 2020         | 74                         | x                                | AU21       | 2 Feb 2021         | 64                         | x                                |
| AV20       | 8 Feb 2020         | 79                         | x                                | AV21       | 9 Feb 2021         | 69                         | x                                |
| AW20       | 17 Feb 2020        | 84                         | x                                | AW21       | 16 Feb 2021        | 72                         | x                                |
| AX20       | 24 Feb 2020        | 89                         | x                                | AX21       | 23 Feb 2021        | 75                         | x (Not all species)              |
| AY20       | 2 Mar 2020         | 93                         | x                                | AY21       | 26 Feb 2021        | 77                         |                                  |
| AZ20       | 8 Mar 2020         | 99                         | x                                |            |                    |                            |                                  |
| BA20       | 14 Mar 2020        | 101                        | x (Not all species)              |            |                    |                            |                                  |
| BB20       | 18 Mar 2020        | 105                        |                                  |            |                    |                            |                                  |
| BC20       | 19 Mar 2020        | 106                        |                                  |            |                    |                            |                                  |
| BD20       | 22 Mar 2020        | 107                        |                                  |            |                    |                            |                                  |
| BE20       | 27 Mar 2020        | 111                        |                                  |            |                    |                            |                                  |
| BF20       | 4 Apr 2020         | 117                        |                                  |            |                    |                            |                                  |
| BG20       | 8 Apr 2020         | 119                        |                                  |            |                    |                            |                                  |
| BH20       | 11 Apr 2020        | 122                        |                                  |            |                    |                            |                                  |
| BI20       | 13 Apr 2020        | 123                        |                                  |            |                    |                            |                                  |
| BJ20       | 16 Apr 2020        | 125                        |                                  |            |                    |                            |                                  |
| BK20       | 20 Apr 2020        | 128                        |                                  |            |                    |                            |                                  |
| BL20       | 23 Apr 2020        | 130                        |                                  |            |                    |                            |                                  |
| BM20       | 26 Apr 2020        | 132                        |                                  |            |                    |                            |                                  |
| BN20       | 29 Apr 2020        | 134                        |                                  |            |                    |                            |                                  |
| BO20       | 2 May 2020         | 135                        |                                  |            |                    |                            |                                  |
| BP20       | 4 May 2020         | 135                        |                                  |            |                    |                            |                                  |
| BQ20       | 6 May 2020         | 136                        |                                  |            |                    |                            |                                  |
| BR20       | 9 May 2020         | 138                        |                                  |            |                    |                            |                                  |
| BS20       | 13 May 2020        | 142                        |                                  |            |                    |                            |                                  |
| BT20       | 16 May 2020        | 142                        |                                  |            |                    |                            |                                  |
| BU20       | 19 May 2020        | 143                        |                                  |            |                    |                            |                                  |
| BV20       | 23 May 2020        | 144                        |                                  |            |                    |                            |                                  |

**Table S3. Estimates associated with regressions of deacclimation rate in response to temperature and deacclimation in response to chill accumulation for each species.**

| Species                                       | Temperature response ( $\max k_{deacc}$ ) <sup>†</sup> |           |           |            | Chill response ( $\Psi_{deacc}$ ) <sup>‡</sup> |       |        |      |
|-----------------------------------------------|--------------------------------------------------------|-----------|-----------|------------|------------------------------------------------|-------|--------|------|
|                                               | n<br>(different<br>temperatu<br>re assays)             | $\beta_1$ | $\beta_2$ | $\beta_3$  | n<br>(different<br>chill<br>assays)            | d     | b      | c    |
| <i>Abies balsamea</i>                         | 14                                                     | 0.0937    | -0.00516  | 0.0001491  | 51                                             | 0.017 | -4.38  | 55.0 |
| <i>Acer rubrum</i>                            | 14                                                     | 0.1279    | -0.00312  | 0.0001522  | 50                                             | 0.043 | -11.20 | 70.1 |
| <i>Acer saccharum</i>                         | 1                                                      | 0.0527    | 0.00000   | 0.0000000  | 51                                             | 0.134 | -5.64  | 73.8 |
| <i>Cercis canadensis</i>                      | 14                                                     | 0.0655    | 0.00115   | -0.0000307 | 50                                             | 0.080 | -6.62  | 62.5 |
| <i>Cornus florida</i>                         | 7                                                      | 0.0087    | 0.00475   | -0.0001156 | 49                                             | 0.103 | -6.70  | 68.6 |
| <i>Cornus mas</i>                             | 14                                                     | -0.0485   | 0.01624   | -0.0002497 | 50                                             | 0.048 | -7.10  | 71.8 |
| <i>Fagus grandifolia</i>                      | 7                                                      | 0.0569    | -0.00293  | 0.0000759  | 50                                             | 0.105 | -6.53  | 72.8 |
| <i>Forsythia</i><br>'Meadowlark'              | 14                                                     | -0.0314   | 0.04830   | -0.0012354 | 50                                             | 0.029 | -7.57  | 70.0 |
| <i>Kalmia latifolia</i>                       | 7                                                      | -0.0332   | 0.00326   | 0.0000000  | 50                                             | 0.037 | -3.51  | 59.7 |
| <i>Larix kaempferi</i>                        | 14                                                     | 0.0851    | -0.00454  | 0.0001476  | 49                                             | 0.045 | -4.65  | 63.9 |
| <i>Metasequoia</i><br><i>glyptostroboides</i> | 1                                                      | 0.0606    | 0.00000   | 0.0000000  | 50                                             | 0.118 | -3.96  | 58.2 |
| <i>Picea abies</i>                            | 14                                                     | 0.0658    | -0.00414  | 0.0002155  | 51                                             | 0.006 | -3.50  | 65.8 |
| <i>Prunus armeniaca</i>                       | 14                                                     | 0.1144    | 0.02069   | -0.0004248 | 50                                             | 0.027 | -7.74  | 72.8 |
| <i>Prunus nigra</i>                           | 7                                                      | 0.2602    | -0.02510  | 0.0007594  | 49                                             | 0.039 | -4.62  | 61.9 |
| <i>Rhododendron</i>                           | 4                                                      | 0.1169    | -0.00958  | 0.0002463  | 49                                             | 0.091 | -3.05  | 51.9 |
| All Species                                   |                                                        |           |           |            | 749                                            | 0.065 | -4.98  | 66.0 |

<sup>†</sup> $\max k_{deacc_T} = \beta_1 \times T + \beta_2 \times T^2 + \beta_3 \times T^3$ , where T is the temperature in °C.

<sup>‡</sup> $\Psi_{deacc} = d + \frac{(1-d)}{1 + e^{[b \times (\ln(chill) - \ln(c))]}}$ , where *chill* is the accumulated chill in portions.

**Table S4. Estimates, fitness statistics, and displays associated with linear regressions for each collection and species.**

| Species               | Collection | n                 | $\alpha \pm \text{error}$ | $\beta \pm \text{error}$ | $r^2$  | P-value |
|-----------------------|------------|-------------------|---------------------------|--------------------------|--------|---------|
| <i>Abies balsamea</i> | AA20       | 45                | -15.26 $\pm$ 1.07         | 0.00 $\pm$ 0.16          | 0.00   | 0.975   |
|                       | AB20       | 50                | -14.47 $\pm$ 1.15         | -0.33 $\pm$ 0.18         | 0.07   | 0.071   |
|                       | AC20       | 40                | -15.10 $\pm$ 1.12         | -0.15 $\pm$ 0.22         | 0.01   | 0.480   |
|                       | AD20       | 41                | -18.13 $\pm$ 0.98         | 0.08 $\pm$ 0.16          | 0.01   | 0.591   |
|                       | AE20       | 51                | -17.26 $\pm$ 0.71         | -0.33 $\pm$ 0.07         | 0.30   | <0.001  |
|                       | AF20       | 61                | -18.31 $\pm$ 0.60         | -0.50 $\pm$ 0.11         | 0.26   | <0.001  |
|                       | AG20       | 56                | -19.85 $\pm$ 0.52         | -0.15 $\pm$ 0.03         | 0.26   | <0.001  |
|                       | AH20       | 41                | -22.91 $\pm$ 0.45         | 0.04 $\pm$ 0.03          | 0.06   | 0.132   |
|                       | AI20       | 45                | -24.76 $\pm$ 0.35         | 0.01 $\pm$ 0.01          | 0.01   | 0.601   |
|                       | AJ20       | 46                | -25.85 $\pm$ 0.48         | 0.00 $\pm$ 0.02          | 0.00   | 0.942   |
|                       | AK20       | 43                | -25.83 $\pm$ 0.54         | 0.10 $\pm$ 0.03          | 0.26   | <0.001  |
|                       | AL20       | 35                | -27.45 $\pm$ 0.76         | 0.13 $\pm$ 0.04          | 0.22   | 0.005   |
|                       | AM20       | 33                | -29.35 $\pm$ 0.59         | 0.40 $\pm$ 0.03          | 0.82   | <0.001  |
|                       | AN20       | 45                | -27.44 $\pm$ 0.64         | 0.35 $\pm$ 0.04          | 0.69   | <0.001  |
|                       | AO20       | 41                | -29.57 $\pm$ 0.84         | 0.65 $\pm$ 0.06          | 0.77   | <0.001  |
|                       | AP20       | 40                | -27.72 $\pm$ 0.63         | 0.38 $\pm$ 0.05          | 0.58   | <0.001  |
|                       | AQ20       | 46                | -27.93 $\pm$ 0.52         | 0.68 $\pm$ 0.05          | 0.83   | <0.001  |
|                       | AR20       | 47                | -27.88 $\pm$ 0.60         | 0.57 $\pm$ 0.05          | 0.75   | <0.001  |
|                       | AS20       | 44                | -29.99 $\pm$ 0.59         | 0.98 $\pm$ 0.05          | 0.90   | <0.001  |
|                       | AT20       | 48                | -27.42 $\pm$ 0.46         | 0.71 $\pm$ 0.05          | 0.82   | <0.001  |
|                       | AU20       | 43                | -26.51 $\pm$ 0.46         | 0.98 $\pm$ 0.06          | 0.85   | <0.001  |
|                       | AV20       | 26                | -26.83 $\pm$ 0.46         | 0.92 $\pm$ 0.07          | 0.87   | <0.001  |
|                       | AW20       | 46                | -26.78 $\pm$ 0.53         | 1.08 $\pm$ 0.08          | 0.80   | <0.001  |
|                       | AX20       | 42                | -26.42 $\pm$ 0.59         | 1.18 $\pm$ 0.11          | 0.73   | <0.001  |
|                       | AY20       | 38                | -25.84 $\pm$ 0.66         | 0.98 $\pm$ 0.12          | 0.66   | <0.001  |
|                       | AZ20       | 33                | -25.77 $\pm$ 0.42         | 1.11 $\pm$ 0.08          | 0.86   | <0.001  |
|                       | BA20       | 45                | -22.87 $\pm$ 0.39         | 0.97 $\pm$ 0.11          | 0.63   | <0.001  |
|                       | AA21       | 25                | -14.47 $\pm$ 0.72         | -0.26 $\pm$ 0.13         | 0.15   | 0.059   |
|                       | AB21       | 38                | -15.16 $\pm$ 0.87         | -0.33 $\pm$ 0.11         | 0.20   | 0.006   |
|                       | AC21       | 49                | -20.89 $\pm$ 0.68         | -0.08 $\pm$ 0.05         | 0.05   | 0.135   |
|                       | AD21       | 55                | -22.19 $\pm$ 0.46         | -0.11 $\pm$ 0.03         | 0.18   | 0.001   |
|                       | AE21       | 44                | -23.23 $\pm$ 0.45         | 0.09 $\pm$ 0.03          | 0.22   | 0.001   |
|                       | AF21       | 41                | -24.73 $\pm$ 0.35         | 0.01 $\pm$ 0.03          | 0.01   | 0.638   |
| AG21                  | 40         | -23.69 $\pm$ 0.38 | -0.06 $\pm$ 0.03          | 0.10                     | 0.047  |         |
| AH21                  | 49         | -26.45 $\pm$ 0.33 | 0.11 $\pm$ 0.02           | 0.35                     | <0.001 |         |
| AI21                  | 40         | -23.40 $\pm$ 0.59 | -0.12 $\pm$ 0.06          | 0.09                     | 0.058  |         |
| AJ21                  | 61         | -25.62 $\pm$ 0.34 | 0.04 $\pm$ 0.02           | 0.10                     | 0.013  |         |
| AK21                  | 53         | -26.76 $\pm$ 0.30 | 0.12 $\pm$ 0.01           | 0.56                     | <0.001 |         |

|                    |      |    |        |       |       |       |      |        |
|--------------------|------|----|--------|-------|-------|-------|------|--------|
|                    | AL21 | 59 | -25.54 | ±0.30 | 0.08  | ±0.01 | 0.37 | <0.001 |
|                    | AM21 | 58 | -27.08 | ±0.43 | 0.08  | ±0.02 | 0.16 | 0.002  |
|                    | AN21 | 56 | -29.59 | ±0.28 | 0.18  | ±0.02 | 0.68 | <0.001 |
|                    | AO21 | 47 | -29.07 | ±0.52 | 0.40  | ±0.04 | 0.66 | <0.001 |
|                    | AP21 | 45 | -29.74 | ±0.75 | 0.55  | ±0.06 | 0.70 | <0.001 |
|                    | AQ21 | 39 | -27.83 | ±0.40 | 0.28  | ±0.03 | 0.63 | <0.001 |
|                    | AR21 | 45 | -28.00 | ±0.51 | 0.54  | ±0.04 | 0.78 | <0.001 |
|                    | AS21 | 43 | -27.18 | ±0.50 | 0.42  | ±0.04 | 0.72 | <0.001 |
|                    | AT21 | 43 | -30.21 | ±0.32 | 0.77  | ±0.04 | 0.89 | <0.001 |
|                    | AU21 | 55 | -27.27 | ±0.57 | 0.72  | ±0.06 | 0.74 | <0.001 |
|                    | AV21 | 45 | -26.84 | ±0.54 | 0.69  | ±0.08 | 0.60 | <0.001 |
|                    | AW21 | 47 | -27.98 | ±0.70 | 0.97  | ±0.14 | 0.50 | <0.001 |
|                    | AX21 | 48 | -26.16 | ±0.56 | 1.24  | ±0.22 | 0.40 | <0.001 |
| <i>Acer rubrum</i> | AA20 | 26 | -8.68  | ±1.18 | 0.02  | ±0.15 | 0.00 | 0.885  |
|                    | AB20 | 27 | -7.06  | ±0.77 | -0.05 | ±0.12 | 0.01 | 0.716  |
|                    | AC20 | 34 | -9.16  | ±1.73 | -0.01 | ±0.29 | 0.00 | 0.982  |
|                    | AD20 | 29 | -9.99  | ±1.29 | 0.10  | ±0.21 | 0.01 | 0.634  |
|                    | AE20 | 35 | -9.75  | ±1.02 | -0.30 | ±0.12 | 0.16 | 0.017  |
|                    | AF20 | 39 | -18.84 | ±0.87 | 0.08  | ±0.11 | 0.02 | 0.455  |
|                    | AG20 | 33 | -20.25 | ±0.53 | 0.09  | ±0.04 | 0.16 | 0.019  |
|                    | AH20 | 25 | -21.82 | ±0.77 | 0.06  | ±0.05 | 0.06 | 0.237  |
|                    | AI20 | 31 | -21.58 | ±0.50 | 0.00  | ±0.02 | 0.00 | 0.883  |
|                    | AJ20 | 37 | -24.89 | ±0.89 | 0.12  | ±0.04 | 0.19 | 0.008  |
|                    | AK20 | 44 | -21.99 | ±0.59 | -0.01 | ±0.03 | 0.00 | 0.686  |
|                    | AL20 | 33 | -25.09 | ±0.69 | 0.10  | ±0.04 | 0.19 | 0.012  |
|                    | AM20 | 26 | -24.06 | ±0.92 | 0.09  | ±0.06 | 0.09 | 0.144  |
|                    | AN20 | 30 | -23.74 | ±1.34 | 0.16  | ±0.07 | 0.15 | 0.036  |
|                    | AO20 | 32 | -26.51 | ±0.48 | 0.24  | ±0.04 | 0.58 | <0.001 |
|                    | AP20 | 34 | -25.36 | ±1.06 | 0.28  | ±0.09 | 0.24 | 0.004  |
|                    | AQ20 | 35 | -25.94 | ±1.22 | 0.89  | ±0.14 | 0.55 | <0.001 |
|                    | AR20 | 42 | -23.50 | ±0.94 | 0.38  | ±0.08 | 0.36 | <0.001 |
|                    | AS20 | 45 | -23.62 | ±0.78 | 0.44  | ±0.07 | 0.46 | <0.001 |
|                    | AT20 | 36 | -25.52 | ±0.91 | 0.84  | ±0.13 | 0.55 | <0.001 |
|                    | AU20 | 30 | -23.01 | ±0.85 | 1.65  | ±0.41 | 0.37 | <0.001 |
|                    | AV20 | 47 | -25.38 | ±0.57 | 2.54  | ±0.23 | 0.74 | <0.001 |
|                    | AW20 | 35 | -24.62 | ±0.59 | 2.54  | ±0.31 | 0.67 | <0.001 |
|                    | AX20 | 40 | -21.99 | ±0.83 | 2.48  | ±0.31 | 0.63 | <0.001 |
|                    | AY20 | 30 | -20.41 | ±0.57 | 3.41  | ±0.44 | 0.68 | <0.001 |
|                    | AZ20 | 30 | -19.37 | ±0.84 | 3.20  | ±0.65 | 0.46 | <0.001 |
|                    | AA21 | 12 | -4.16  | ±1.19 | -0.32 | ±0.17 | 0.25 | 0.097  |

|                       |      |    |        |       |       |       |      |        |
|-----------------------|------|----|--------|-------|-------|-------|------|--------|
|                       | AB21 | 28 | -2.99  | ±1.68 | -0.65 | ±0.22 | 0.26 | 0.006  |
|                       | AC21 | 47 | -9.08  | ±0.95 | -0.24 | ±0.08 | 0.17 | 0.004  |
|                       | AD21 | 47 | -17.08 | ±0.50 | 0.11  | ±0.03 | 0.19 | 0.002  |
|                       | AE21 | 45 | -19.04 | ±0.71 | 0.24  | ±0.04 | 0.46 | <0.001 |
|                       | AF21 | 50 | -19.76 | ±0.64 | 0.18  | ±0.05 | 0.23 | <0.001 |
|                       | AG21 | 60 | -20.13 | ±0.49 | 0.15  | ±0.02 | 0.43 | <0.001 |
|                       | AH21 | 57 | -21.59 | ±0.52 | 0.15  | ±0.03 | 0.29 | <0.001 |
|                       | AI21 | 69 | -21.36 | ±0.43 | 0.14  | ±0.02 | 0.49 | <0.001 |
|                       | AJ21 | 70 | -22.60 | ±0.45 | 0.18  | ±0.02 | 0.53 | <0.001 |
|                       | AK21 | 79 | -23.40 | ±0.49 | 0.15  | ±0.02 | 0.42 | <0.001 |
|                       | AL21 | 80 | -23.83 | ±0.49 | 0.22  | ±0.02 | 0.54 | <0.001 |
|                       | AM21 | 70 | -24.39 | ±0.44 | 0.19  | ±0.03 | 0.42 | <0.001 |
|                       | AN21 | 70 | -24.71 | ±0.56 | 0.21  | ±0.04 | 0.32 | <0.001 |
|                       | AO21 | 50 | -25.33 | ±0.67 | 0.25  | ±0.06 | 0.29 | <0.001 |
|                       | AP21 | 59 | -26.40 | ±0.71 | 0.41  | ±0.05 | 0.52 | <0.001 |
|                       | AQ21 | 50 | -24.78 | ±0.67 | 0.29  | ±0.05 | 0.39 | <0.001 |
|                       | AR21 | 69 | -25.89 | ±0.68 | 0.30  | ±0.06 | 0.28 | <0.001 |
|                       | AS21 | 58 | -25.94 | ±0.71 | 0.50  | ±0.09 | 0.34 | <0.001 |
|                       | AT21 | 50 | -27.42 | ±0.72 | 0.76  | ±0.13 | 0.42 | <0.001 |
|                       | AU21 | 58 | -28.03 | ±0.78 | 1.34  | ±0.11 | 0.74 | <0.001 |
|                       | AV21 | 80 | -26.17 | ±0.63 | 1.59  | ±0.13 | 0.64 | <0.001 |
|                       | AW21 | 79 | -26.23 | ±0.67 | 2.00  | ±0.15 | 0.69 | <0.001 |
|                       | AX21 | 50 | -24.68 | ±0.70 | 2.25  | ±0.29 | 0.57 | <0.001 |
| <i>Acer saccharum</i> | AA20 | 24 | -6.56  | ±0.34 | 0.11  | ±0.05 | 0.18 | 0.039  |
|                       | AB20 | 24 | -6.80  | ±0.41 | 0.20  | ±0.07 | 0.27 | 0.009  |
|                       | AC20 | 20 | -5.80  | ±0.39 | 0.05  | ±0.08 | 0.02 | 0.526  |
|                       | AD20 | 21 | -7.20  | ±0.97 | 0.16  | ±0.14 | 0.06 | 0.267  |
|                       | AE20 | 24 | -5.56  | ±1.99 | -2.01 | ±0.39 | 0.55 | <0.001 |
|                       | AF20 | 19 | -20.65 | ±1.44 | 0.32  | ±0.27 | 0.08 | 0.252  |
|                       | AG20 | 27 | -24.26 | ±0.73 | 0.21  | ±0.05 | 0.43 | <0.001 |
|                       | AH20 | 20 | -21.10 | ±0.51 | 0.04  | ±0.03 | 0.12 | 0.133  |
|                       | AI20 | 22 | -26.19 | ±0.38 | 0.15  | ±0.02 | 0.84 | <0.001 |
|                       | AJ20 | 23 | -26.43 | ±0.58 | 0.23  | ±0.03 | 0.76 | <0.001 |
|                       | AK20 | 25 | -27.17 | ±0.84 | 0.22  | ±0.04 | 0.56 | <0.001 |
|                       | AL20 | 18 | -28.16 | ±0.93 | 0.27  | ±0.05 | 0.64 | <0.001 |
|                       | AM20 | 21 | -28.20 | ±0.71 | 0.26  | ±0.04 | 0.71 | <0.001 |
|                       | AN20 | 23 | -29.14 | ±0.72 | 0.23  | ±0.04 | 0.62 | <0.001 |
|                       | AO20 | 28 | -29.72 | ±0.66 | 0.30  | ±0.04 | 0.70 | <0.001 |
|                       | AP20 | 23 | -30.28 | ±0.83 | 0.37  | ±0.07 | 0.56 | <0.001 |
|                       | AQ20 | 23 | -31.49 | ±0.65 | 0.52  | ±0.06 | 0.78 | <0.001 |

|                          |      |    |        |       |       |       |      |        |
|--------------------------|------|----|--------|-------|-------|-------|------|--------|
|                          | AR20 | 27 | -30.06 | ±1.31 | 0.42  | ±0.10 | 0.42 | <0.001 |
|                          | AS20 | 32 | -29.77 | ±0.66 | 0.30  | ±0.06 | 0.46 | <0.001 |
|                          | AT20 | 28 | -29.93 | ±0.70 | 0.24  | ±0.08 | 0.26 | 0.005  |
|                          | AU20 | 32 | -30.34 | ±0.69 | 0.42  | ±0.09 | 0.42 | <0.001 |
|                          | AV20 | 26 | -31.23 | ±0.44 | 0.48  | ±0.04 | 0.83 | <0.001 |
|                          | AW20 | 35 | -30.32 | ±0.59 | 0.50  | ±0.11 | 0.40 | <0.001 |
|                          | AX20 | 29 | -31.69 | ±0.54 | 0.92  | ±0.10 | 0.77 | <0.001 |
|                          | AY20 | 23 | -29.54 | ±0.49 | 1.24  | ±0.20 | 0.65 | <0.001 |
|                          | AZ20 | 37 | -29.16 | ±0.70 | 1.08  | ±0.11 | 0.74 | <0.001 |
|                          | BA20 | 28 | -27.07 | ±0.63 | 1.39  | ±0.20 | 0.64 | <0.001 |
|                          | AA21 | 19 | -16.68 | ±1.01 | -0.05 | ±0.14 | 0.01 | 0.714  |
|                          | AB21 | 40 | -19.42 | ±0.61 | -0.05 | ±0.07 | 0.01 | 0.515  |
|                          | AC21 | 30 | -19.06 | ±0.88 | 0.29  | ±0.13 | 0.15 | 0.033  |
|                          | AD21 | 59 | -18.48 | ±0.47 | 0.20  | ±0.03 | 0.38 | <0.001 |
|                          | AE21 | 50 | -19.50 | ±0.66 | -0.03 | ±0.04 | 0.01 | 0.453  |
|                          | AF21 | 48 | -20.70 | ±0.51 | 0.14  | ±0.04 | 0.22 | 0.001  |
|                          | AG21 | 50 | -20.97 | ±0.58 | 0.21  | ±0.04 | 0.34 | <0.001 |
|                          | AH21 | 60 | -22.11 | ±0.37 | 0.06  | ±0.02 | 0.12 | 0.006  |
|                          | AI21 | 70 | -24.79 | ±0.46 | 0.20  | ±0.02 | 0.64 | <0.001 |
|                          | AJ21 | 65 | -24.40 | ±0.48 | 0.15  | ±0.03 | 0.35 | <0.001 |
|                          | AK21 | 70 | -23.76 | ±0.58 | 0.13  | ±0.02 | 0.33 | <0.001 |
|                          | AL21 | 70 | -26.05 | ±0.52 | 0.20  | ±0.02 | 0.52 | <0.001 |
|                          | AM21 | 60 | -25.84 | ±0.50 | 0.23  | ±0.03 | 0.52 | <0.001 |
|                          | AN21 | 59 | -24.77 | ±0.50 | 0.17  | ±0.03 | 0.34 | <0.001 |
|                          | AO21 | 50 | -24.99 | ±0.48 | 0.21  | ±0.04 | 0.36 | <0.001 |
|                          | AP21 | 48 | -26.16 | ±0.56 | 0.22  | ±0.04 | 0.38 | <0.001 |
|                          | AQ21 | 50 | -26.23 | ±0.58 | 0.22  | ±0.05 | 0.31 | <0.001 |
|                          | AR21 | 49 | -27.23 | ±0.51 | 0.29  | ±0.06 | 0.35 | <0.001 |
|                          | AS21 | 60 | -28.39 | ±0.54 | 0.47  | ±0.05 | 0.61 | <0.001 |
|                          | AT21 | 60 | -27.26 | ±0.53 | 0.35  | ±0.05 | 0.41 | <0.001 |
|                          | AU21 | 67 | -28.61 | ±0.56 | 0.63  | ±0.06 | 0.65 | <0.001 |
|                          | AV21 | 59 | -28.97 | ±0.50 | 0.86  | ±0.07 | 0.71 | <0.001 |
|                          | AW21 | 60 | -27.24 | ±0.51 | 0.79  | ±0.10 | 0.50 | <0.001 |
|                          | AX21 | 50 | -26.20 | ±0.48 | 0.79  | ±0.20 | 0.25 | <0.001 |
| <i>Cercis canadensis</i> | AA20 | 29 | -7.88  | ±1.07 | -0.15 | ±0.13 | 0.05 | 0.255  |
|                          | AB20 | 38 | -10.38 | ±0.88 | 0.24  | ±0.14 | 0.08 | 0.095  |
|                          | AC20 | 29 | -10.48 | ±0.87 | 0.30  | ±0.15 | 0.13 | 0.059  |
|                          | AD20 | 30 | -9.61  | ±0.71 | 0.00  | ±0.11 | 0.00 | 0.968  |
|                          | AE20 | 35 | -10.14 | ±0.68 | 0.02  | ±0.08 | 0.00 | 0.812  |
|                          | AF20 | 43 | -13.42 | ±0.67 | 0.16  | ±0.08 | 0.09 | 0.045  |

|      |    |        |       |       |       |      |        |
|------|----|--------|-------|-------|-------|------|--------|
| AG20 | 39 | -13.66 | ±0.58 | 0.13  | ±0.04 | 0.26 | 0.001  |
| AH20 | 33 | -11.71 | ±0.44 | 0.05  | ±0.02 | 0.13 | 0.038  |
| AI20 | 25 | -12.98 | ±0.54 | 0.08  | ±0.02 | 0.39 | 0.001  |
| AJ20 | 41 | -14.49 | ±0.62 | 0.14  | ±0.03 | 0.29 | <0.001 |
| AK20 | 32 | -15.26 | ±0.64 | 0.18  | ±0.03 | 0.57 | <0.001 |
| AL20 | 27 | -15.36 | ±0.58 | 0.25  | ±0.03 | 0.68 | <0.001 |
| AM20 | 28 | -16.03 | ±0.56 | 0.34  | ±0.03 | 0.83 | <0.001 |
| AN20 | 34 | -16.05 | ±0.91 | 0.38  | ±0.05 | 0.66 | <0.001 |
| AO20 | 38 | -17.04 | ±0.63 | 0.40  | ±0.04 | 0.74 | <0.001 |
| AP20 | 36 | -17.65 | ±0.66 | 0.56  | ±0.06 | 0.73 | <0.001 |
| AQ20 | 40 | -18.50 | ±0.57 | 0.67  | ±0.05 | 0.80 | <0.001 |
| AR20 | 30 | -17.55 | ±0.62 | 0.49  | ±0.05 | 0.77 | <0.001 |
| AS20 | 20 | -17.62 | ±0.95 | 1.09  | ±0.14 | 0.78 | <0.001 |
| AT20 | 26 | -17.42 | ±0.77 | 0.95  | ±0.16 | 0.59 | <0.001 |
| AU20 | 19 | -16.49 | ±0.78 | 1.25  | ±0.17 | 0.76 | <0.001 |
| AV20 | 40 | -14.41 | ±0.68 | 1.53  | ±0.27 | 0.46 | <0.001 |
| AW20 | 38 | -13.03 | ±0.53 | 1.92  | ±0.22 | 0.68 | <0.001 |
| AX20 | 44 | -12.13 | ±0.55 | 1.52  | ±0.23 | 0.51 | <0.001 |
| AY20 | 41 | -11.36 | ±0.42 | 1.39  | ±0.17 | 0.63 | <0.001 |
| AZ20 | 24 | -9.39  | ±0.72 | 1.38  | ±0.55 | 0.22 | 0.021  |
| BA20 | 27 | -8.51  | ±0.56 | 1.47  | ±0.45 | 0.29 | 0.003  |
| AA21 | 25 | -6.71  | ±0.50 | -0.02 | ±0.08 | 0.00 | 0.780  |
| AB21 | 35 | -6.84  | ±0.63 | -0.19 | ±0.08 | 0.15 | 0.022  |
| AC21 | 51 | -8.89  | ±0.40 | -0.05 | ±0.03 | 0.05 | 0.115  |
| AD21 | 54 | -10.14 | ±0.35 | -0.01 | ±0.02 | 0.00 | 0.663  |
| AE21 | 43 | -11.35 | ±0.46 | 0.13  | ±0.03 | 0.36 | <0.001 |
| AF21 | 50 | -13.54 | ±0.47 | 0.17  | ±0.04 | 0.33 | <0.001 |
| AG21 | 59 | -12.57 | ±0.37 | 0.07  | ±0.02 | 0.20 | <0.001 |
| AH21 | 58 | -13.71 | ±0.50 | 0.08  | ±0.03 | 0.14 | 0.004  |
| AI21 | 70 | -15.33 | ±0.39 | 0.12  | ±0.02 | 0.48 | <0.001 |
| AJ21 | 70 | -14.17 | ±0.36 | 0.15  | ±0.02 | 0.53 | <0.001 |
| AK21 | 80 | -16.55 | ±0.38 | 0.20  | ±0.02 | 0.53 | <0.001 |
| AL21 | 78 | -15.78 | ±0.43 | 0.20  | ±0.02 | 0.55 | <0.001 |
| AM21 | 50 | -17.19 | ±0.49 | 0.34  | ±0.04 | 0.60 | <0.001 |
| AN21 | 50 | -16.12 | ±0.45 | 0.36  | ±0.03 | 0.71 | <0.001 |
| AO21 | 60 | -18.15 | ±0.49 | 0.44  | ±0.04 | 0.72 | <0.001 |
| AP21 | 49 | -17.64 | ±0.54 | 0.46  | ±0.06 | 0.55 | <0.001 |
| AQ21 | 70 | -16.20 | ±0.42 | 0.39  | ±0.05 | 0.51 | <0.001 |
| AR21 | 79 | -17.59 | ±0.36 | 0.49  | ±0.04 | 0.71 | <0.001 |
| AS21 | 70 | -18.46 | ±0.55 | 0.70  | ±0.08 | 0.56 | <0.001 |

*Cornus florida*

|      |    |        |       |       |       |      |        |
|------|----|--------|-------|-------|-------|------|--------|
| AT21 | 70 | -17.35 | ±0.55 | 0.64  | ±0.08 | 0.50 | <0.001 |
| AU21 | 70 | -17.35 | ±0.53 | 1.01  | ±0.09 | 0.63 | <0.001 |
| AV21 | 80 | -17.16 | ±0.56 | 1.25  | ±0.12 | 0.58 | <0.001 |
| AW21 | 70 | -16.84 | ±0.57 | 1.71  | ±0.16 | 0.63 | <0.001 |
| AA20 | 19 | -6.54  | ±0.29 | 0.11  | ±0.04 | 0.32 | 0.011  |
| AB20 | 21 | -6.31  | ±0.29 | 0.12  | ±0.05 | 0.21 | 0.038  |
| AC20 | 17 | -5.92  | ±0.32 | 0.07  | ±0.05 | 0.09 | 0.234  |
| AD20 | 16 | -5.45  | ±0.31 | -0.02 | ±0.04 | 0.01 | 0.682  |
| AE20 | 30 | -9.41  | ±1.20 | -0.07 | ±0.10 | 0.02 | 0.442  |
| AF20 | 43 | -8.73  | ±1.66 | -0.80 | ±0.24 | 0.22 | 0.002  |
| AG20 | 52 | -22.72 | ±0.62 | 0.35  | ±0.04 | 0.59 | <0.001 |
| AH20 | 47 | -23.21 | ±0.81 | 0.29  | ±0.05 | 0.45 | <0.001 |
| AI20 | 42 | -22.36 | ±0.96 | 0.14  | ±0.03 | 0.29 | <0.001 |
| AJ20 | 48 | -24.04 | ±0.51 | 0.19  | ±0.03 | 0.54 | <0.001 |
| AK20 | 46 | -24.86 | ±0.92 | 0.31  | ±0.04 | 0.55 | <0.001 |
| AL20 | 36 | -24.20 | ±0.77 | 0.13  | ±0.04 | 0.21 | 0.005  |
| AM20 | 36 | -24.20 | ±0.32 | 0.15  | ±0.02 | 0.66 | <0.001 |
| AN20 | 37 | -24.72 | ±0.82 | 0.26  | ±0.06 | 0.39 | <0.001 |
| AO20 | 44 | -25.25 | ±0.72 | 0.22  | ±0.05 | 0.35 | <0.001 |
| AP20 | 49 | -23.98 | ±0.50 | 0.22  | ±0.04 | 0.34 | <0.001 |
| AQ20 | 48 | -25.03 | ±0.64 | 0.36  | ±0.06 | 0.44 | <0.001 |
| AR20 | 42 | -26.17 | ±0.86 | 0.82  | ±0.08 | 0.70 | <0.001 |
| AS20 | 36 | -27.43 | ±0.86 | 0.96  | ±0.10 | 0.75 | <0.001 |
| AT20 | 49 | -26.70 | ±0.95 | 0.96  | ±0.10 | 0.65 | <0.001 |
| AU20 | 47 | -23.25 | ±0.77 | 0.31  | ±0.11 | 0.14 | 0.010  |
| AW20 | 48 | -25.17 | ±0.68 | 1.13  | ±0.10 | 0.72 | <0.001 |
| AX20 | 54 | -25.85 | ±0.69 | 1.27  | ±0.12 | 0.69 | <0.001 |
| AY20 | 40 | -23.11 | ±0.76 | 1.32  | ±0.14 | 0.70 | <0.001 |
| AZ20 | 40 | -23.27 | ±0.94 | 1.33  | ±0.19 | 0.55 | <0.001 |
| AA21 | 10 | -4.59  | ±0.73 | 0.01  | ±0.10 | 0.00 | 0.956  |
| AB21 | 34 | -10.13 | ±0.89 | 0.25  | ±0.13 | 0.11 | 0.061  |
| AC21 | 49 | -10.05 | ±0.76 | -0.03 | ±0.07 | 0.00 | 0.630  |
| AD21 | 55 | -15.88 | ±0.71 | 0.23  | ±0.05 | 0.25 | <0.001 |
| AE21 | 50 | -17.49 | ±0.90 | 0.09  | ±0.05 | 0.05 | 0.112  |
| AF21 | 49 | -19.24 | ±0.81 | 0.05  | ±0.06 | 0.01 | 0.429  |
| AG21 | 56 | -19.82 | ±0.78 | 0.14  | ±0.04 | 0.17 | 0.002  |
| AH21 | 50 | -24.10 | ±0.54 | 0.28  | ±0.05 | 0.39 | <0.001 |
| AI21 | 60 | -24.45 | ±0.51 | 0.26  | ±0.03 | 0.59 | <0.001 |
| AJ21 | 60 | -24.37 | ±0.43 | 0.18  | ±0.03 | 0.42 | <0.001 |
| AK21 | 60 | -23.49 | ±0.52 | 0.13  | ±0.03 | 0.28 | <0.001 |



|                   |      |    |        |       |       |       |      |        |
|-------------------|------|----|--------|-------|-------|-------|------|--------|
|                   | AL21 | 59 | -23.23 | ±0.53 | 0.11  | ±0.03 | 0.18 | 0.001  |
|                   | AM21 | 60 | -23.93 | ±0.35 | 0.10  | ±0.02 | 0.30 | <0.001 |
|                   | AN21 | 60 | -23.30 | ±0.38 | 0.06  | ±0.02 | 0.11 | 0.008  |
|                   | AO21 | 50 | -22.17 | ±0.54 | -0.05 | ±0.05 | 0.02 | 0.315  |
|                   | AP21 | 50 | -24.74 | ±0.38 | 0.17  | ±0.03 | 0.44 | <0.001 |
|                   | AQ21 | 50 | -23.68 | ±0.53 | 0.14  | ±0.04 | 0.17 | 0.003  |
|                   | AR21 | 69 | -23.79 | ±0.56 | 0.35  | ±0.05 | 0.43 | <0.001 |
|                   | AS21 | 49 | -24.14 | ±0.63 | 0.29  | ±0.08 | 0.23 | <0.001 |
|                   | AT21 | 60 | -24.25 | ±0.72 | 0.66  | ±0.07 | 0.58 | <0.001 |
|                   | AU21 | 59 | -24.93 | ±0.67 | 0.59  | ±0.09 | 0.42 | <0.001 |
|                   | AV21 | 58 | -24.18 | ±0.57 | 0.60  | ±0.08 | 0.47 | <0.001 |
|                   | AW21 | 60 | -24.20 | ±0.57 | 0.40  | ±0.09 | 0.24 | <0.001 |
|                   | AX21 | 50 | -24.64 | ±0.42 | 0.80  | ±0.17 | 0.30 | <0.001 |
| <i>Cornus mas</i> | AA20 | 20 | -6.09  | ±0.39 | 0.11  | ±0.05 | 0.19 | 0.058  |
|                   | AB20 | 19 | -5.65  | ±0.25 | 0.04  | ±0.05 | 0.03 | 0.460  |
|                   | AC20 | 11 | -5.17  | ±0.36 | 0.08  | ±0.07 | 0.13 | 0.270  |
|                   | AD20 | 14 | -5.23  | ±0.26 | 0.07  | ±0.04 | 0.18 | 0.132  |
|                   | AE20 | 22 | -3.69  | ±0.67 | -0.58 | ±0.05 | 0.86 | <0.001 |
|                   | AF20 | 57 | -10.46 | ±0.93 | -0.53 | ±0.09 | 0.37 | <0.001 |
|                   | AG20 | 59 | -18.20 | ±0.52 | 0.07  | ±0.03 | 0.08 | 0.033  |
|                   | AH20 | 49 | -18.68 | ±0.45 | 0.06  | ±0.03 | 0.11 | 0.020  |
|                   | AI20 | 48 | -20.81 | ±0.69 | 0.18  | ±0.03 | 0.51 | <0.001 |
|                   | AJ20 | 50 | -20.61 | ±0.68 | 0.19  | ±0.03 | 0.39 | <0.001 |
|                   | AK20 | 48 | -21.57 | ±0.79 | 0.31  | ±0.04 | 0.58 | <0.001 |
|                   | AL20 | 40 | -21.30 | ±0.94 | 0.39  | ±0.05 | 0.58 | <0.001 |
|                   | AM20 | 30 | -20.67 | ±0.84 | 0.42  | ±0.08 | 0.48 | <0.001 |
|                   | AN20 | 40 | -20.89 | ±0.96 | 0.53  | ±0.07 | 0.59 | <0.001 |
|                   | AO20 | 27 | -23.02 | ±1.09 | 1.28  | ±0.15 | 0.73 | <0.001 |
|                   | AP20 | 36 | -21.71 | ±1.16 | 1.00  | ±0.17 | 0.49 | <0.001 |
|                   | AQ20 | 39 | -22.55 | ±0.94 | 1.41  | ±0.16 | 0.69 | <0.001 |
|                   | AR20 | 68 | -20.97 | ±0.73 | 1.00  | ±0.15 | 0.41 | <0.001 |
|                   | AS20 | 39 | -21.49 | ±1.01 | 1.76  | ±0.40 | 0.34 | <0.001 |
|                   | AT20 | 40 | -20.76 | ±1.00 | 1.22  | ±0.26 | 0.37 | <0.001 |
|                   | AU20 | 40 | -20.07 | ±0.66 | 1.22  | ±0.35 | 0.24 | 0.001  |
|                   | AV20 | 38 | -22.27 | ±0.90 | 3.56  | ±0.50 | 0.58 | <0.001 |
|                   | AW20 | 30 | -22.09 | ±0.80 | 3.26  | ±0.62 | 0.49 | <0.001 |
|                   | AX20 | 39 | -21.58 | ±0.99 | 4.03  | ±0.53 | 0.61 | <0.001 |
|                   | AY20 | 30 | -22.22 | ±0.67 | 3.59  | ±0.52 | 0.63 | <0.001 |
|                   | AZ20 | 20 | -20.19 | ±1.02 | 5.36  | ±1.44 | 0.43 | 0.002  |
|                   | AA21 | 32 | -8.30  | ±0.94 | -0.54 | ±0.14 | 0.34 | <0.001 |

|                          |      |    |        |       |       |       |      |        |
|--------------------------|------|----|--------|-------|-------|-------|------|--------|
|                          | AB21 | 44 | -13.07 | ±1.06 | -0.24 | ±0.13 | 0.08 | 0.063  |
|                          | AC21 | 60 | -12.53 | ±0.80 | -0.12 | ±0.07 | 0.05 | 0.083  |
|                          | AD21 | 54 | -12.92 | ±0.81 | -0.17 | ±0.06 | 0.16 | 0.003  |
|                          | AE21 | 45 | -16.54 | ±0.70 | 0.04  | ±0.04 | 0.03 | 0.271  |
|                          | AF21 | 47 | -19.26 | ±0.70 | 0.10  | ±0.05 | 0.07 | 0.063  |
|                          | AG21 | 60 | -19.50 | ±0.51 | 0.12  | ±0.02 | 0.30 | <0.001 |
|                          | AH21 | 60 | -19.08 | ±0.46 | 0.09  | ±0.03 | 0.18 | 0.001  |
|                          | AI21 | 70 | -19.52 | ±0.50 | 0.10  | ±0.03 | 0.14 | 0.001  |
|                          | AJ21 | 69 | -20.44 | ±0.47 | 0.12  | ±0.03 | 0.18 | <0.001 |
|                          | AK21 | 79 | -20.39 | ±0.48 | 0.22  | ±0.03 | 0.45 | <0.001 |
|                          | AL21 | 80 | -19.84 | ±0.54 | 0.18  | ±0.03 | 0.26 | <0.001 |
|                          | AM21 | 60 | -20.33 | ±0.61 | 0.28  | ±0.05 | 0.32 | <0.001 |
|                          | AN21 | 49 | -20.87 | ±0.58 | 0.31  | ±0.07 | 0.31 | <0.001 |
|                          | AO21 | 40 | -20.92 | ±0.97 | 0.68  | ±0.13 | 0.41 | <0.001 |
|                          | AP21 | 69 | -21.21 | ±0.75 | 0.63  | ±0.10 | 0.36 | <0.001 |
|                          | AQ21 | 78 | -21.00 | ±0.59 | 0.73  | ±0.11 | 0.37 | <0.001 |
|                          | AR21 | 79 | -20.12 | ±0.68 | 0.82  | ±0.15 | 0.28 | <0.001 |
|                          | AS21 | 60 | -20.89 | ±0.75 | 1.12  | ±0.19 | 0.37 | <0.001 |
|                          | AT21 | 70 | -21.80 | ±0.61 | 1.27  | ±0.17 | 0.45 | <0.001 |
|                          | AU21 | 49 | -21.21 | ±0.62 | 1.08  | ±0.26 | 0.27 | <0.001 |
|                          | AV21 | 70 | -20.55 | ±0.84 | 1.60  | ±0.23 | 0.41 | <0.001 |
|                          | AW21 | 49 | -24.00 | ±0.76 | 2.65  | ±0.31 | 0.60 | <0.001 |
|                          | AX21 | 39 | -22.07 | ±0.72 | 1.72  | ±0.38 | 0.35 | <0.001 |
| <i>Fagus grandifolia</i> | AA20 | 35 | -7.30  | ±0.25 | 0.08  | ±0.03 | 0.14 | 0.026  |
|                          | AB20 | 33 | -8.18  | ±0.40 | 0.31  | ±0.07 | 0.42 | <0.001 |
|                          | AC20 | 31 | -9.59  | ±0.68 | 0.44  | ±0.12 | 0.33 | 0.001  |
|                          | AD20 | 32 | -7.91  | ±0.36 | 0.10  | ±0.05 | 0.10 | 0.081  |
|                          | AE20 | 33 | -8.33  | ±0.36 | -0.12 | ±0.04 | 0.26 | 0.002  |
|                          | AF20 | 47 | -10.53 | ±0.27 | -0.05 | ±0.03 | 0.06 | 0.094  |
|                          | AG20 | 31 | -12.85 | ±0.32 | 0.05  | ±0.02 | 0.16 | 0.028  |
|                          | AH20 | 23 | -13.43 | ±0.43 | -0.01 | ±0.03 | 0.01 | 0.727  |
|                          | AI20 | 27 | -13.83 | ±0.47 | -0.01 | ±0.02 | 0.01 | 0.696  |
|                          | AJ20 | 22 | -14.62 | ±0.49 | 0.03  | ±0.03 | 0.05 | 0.335  |
|                          | AK20 | 26 | -14.66 | ±0.29 | 0.01  | ±0.01 | 0.04 | 0.355  |
|                          | AL20 | 21 | -14.81 | ±0.67 | 0.03  | ±0.04 | 0.04 | 0.374  |
|                          | AM20 | 21 | -18.71 | ±0.91 | 0.25  | ±0.05 | 0.54 | <0.001 |
|                          | AN20 | 25 | -15.56 | ±0.72 | 0.02  | ±0.04 | 0.01 | 0.633  |
|                          | AO20 | 28 | -16.87 | ±0.74 | 0.18  | ±0.05 | 0.36 | 0.001  |
|                          | AP20 | 29 | -16.71 | ±0.43 | 0.14  | ±0.04 | 0.30 | 0.002  |
|                          | AQ20 | 27 | -16.02 | ±0.27 | 0.11  | ±0.02 | 0.46 | <0.001 |

|                               |      |    |        |       |       |       |      |        |
|-------------------------------|------|----|--------|-------|-------|-------|------|--------|
|                               | AR20 | 32 | -16.02 | ±0.43 | 0.08  | ±0.04 | 0.13 | 0.045  |
|                               | AS20 | 38 | -16.87 | ±0.51 | 0.18  | ±0.05 | 0.30 | <0.001 |
|                               | AT20 | 38 | -18.19 | ±0.44 | 0.33  | ±0.05 | 0.58 | <0.001 |
|                               | AU20 | 49 | -18.11 | ±0.64 | 0.42  | ±0.08 | 0.37 | <0.001 |
|                               | AV20 | 22 | -17.23 | ±0.73 | 0.57  | ±0.29 | 0.16 | 0.063  |
|                               | AW20 | 59 | -18.01 | ±0.65 | 0.48  | ±0.06 | 0.52 | <0.001 |
|                               | AX20 | 31 | -16.02 | ±0.57 | 0.23  | ±0.15 | 0.08 | 0.120  |
|                               | AY20 | 34 | -17.17 | ±0.52 | 0.80  | ±0.15 | 0.45 | <0.001 |
|                               | AZ20 | 35 | -14.78 | ±0.43 | 0.46  | ±0.09 | 0.46 | <0.001 |
|                               | BA20 | 47 | -13.40 | ±0.52 | 0.73  | ±0.16 | 0.33 | <0.001 |
|                               | AA21 | 32 | -5.00  | ±0.67 | -0.07 | ±0.10 | 0.02 | 0.482  |
|                               | AB21 | 34 | -8.08  | ±0.45 | 0.06  | ±0.06 | 0.03 | 0.322  |
|                               | AC21 | 53 | -9.87  | ±0.30 | 0.16  | ±0.03 | 0.40 | <0.001 |
|                               | AD21 | 57 | -9.83  | ±0.29 | 0.00  | ±0.02 | 0.00 | 0.816  |
|                               | AE21 | 50 | -10.60 | ±0.51 | -0.02 | ±0.03 | 0.01 | 0.534  |
|                               | AF21 | 46 | -11.71 | ±0.34 | -0.03 | ±0.03 | 0.03 | 0.213  |
|                               | AG21 | 44 | -12.57 | ±0.36 | -0.05 | ±0.03 | 0.09 | 0.054  |
|                               | AH21 | 43 | -14.03 | ±0.32 | 0.01  | ±0.03 | 0.00 | 0.659  |
|                               | AI21 | 54 | -14.43 | ±0.27 | 0.02  | ±0.02 | 0.02 | 0.272  |
|                               | AJ21 | 61 | -15.21 | ±0.41 | 0.07  | ±0.02 | 0.17 | 0.001  |
|                               | AK21 | 56 | -15.18 | ±0.36 | 0.02  | ±0.02 | 0.03 | 0.203  |
|                               | AL21 | 60 | -14.73 | ±0.40 | 0.01  | ±0.02 | 0.00 | 0.676  |
|                               | AM21 | 51 | -15.38 | ±0.31 | 0.04  | ±0.02 | 0.10 | 0.025  |
|                               | AN21 | 46 | -16.20 | ±0.39 | 0.06  | ±0.02 | 0.13 | 0.015  |
|                               | AO21 | 38 | -17.00 | ±0.51 | 0.08  | ±0.04 | 0.09 | 0.067  |
|                               | AP21 | 42 | -16.62 | ±0.42 | 0.21  | ±0.03 | 0.57 | <0.001 |
|                               | AQ21 | 40 | -16.41 | ±0.46 | 0.17  | ±0.04 | 0.38 | <0.001 |
|                               | AR21 | 43 | -18.32 | ±0.31 | 0.26  | ±0.02 | 0.74 | <0.001 |
|                               | AS21 | 55 | -16.90 | ±0.51 | 0.23  | ±0.04 | 0.34 | <0.001 |
|                               | AT21 | 53 | -17.08 | ±0.51 | 0.16  | ±0.05 | 0.16 | 0.003  |
|                               | AU21 | 65 | -17.48 | ±0.47 | 0.32  | ±0.05 | 0.42 | <0.001 |
|                               | AV21 | 52 | -17.37 | ±0.49 | 0.26  | ±0.07 | 0.22 | <0.001 |
|                               | AW21 | 43 | -16.78 | ±0.39 | 0.33  | ±0.08 | 0.27 | <0.001 |
| <i>Forsythia 'Meadowlark'</i> | AA20 | 29 | -7.14  | ±0.57 | 0.13  | ±0.08 | 0.09 | 0.107  |
|                               | AB20 | 27 | -6.06  | ±0.29 | 0.04  | ±0.05 | 0.03 | 0.381  |
|                               | AC20 | 24 | -6.06  | ±0.39 | -0.02 | ±0.08 | 0.00 | 0.808  |
|                               | AD20 | 23 | -7.80  | ±0.85 | 0.16  | ±0.13 | 0.06 | 0.245  |
|                               | AE20 | 25 | -7.55  | ±0.93 | -0.14 | ±0.10 | 0.09 | 0.157  |
|                               | AF20 | 42 | -15.69 | ±1.00 | -0.26 | ±0.13 | 0.08 | 0.065  |
|                               | AG20 | 51 | -20.07 | ±0.51 | 0.01  | ±0.04 | 0.00 | 0.816  |

|      |    |        |       |       |       |      |        |
|------|----|--------|-------|-------|-------|------|--------|
| AH20 | 40 | -20.82 | ±0.92 | 0.29  | ±0.05 | 0.43 | <0.001 |
| AI20 | 30 | -23.28 | ±0.81 | 0.40  | ±0.04 | 0.80 | <0.001 |
| AJ20 | 38 | -22.75 | ±0.53 | 0.18  | ±0.03 | 0.49 | <0.001 |
| AK20 | 28 | -23.86 | ±0.73 | 0.49  | ±0.04 | 0.86 | <0.001 |
| AL20 | 26 | -25.47 | ±1.28 | 0.66  | ±0.08 | 0.75 | <0.001 |
| AM20 | 21 | -24.63 | ±1.48 | 0.75  | ±0.15 | 0.56 | <0.001 |
| AN20 | 26 | -24.37 | ±1.42 | 0.83  | ±0.11 | 0.72 | <0.001 |
| AO20 | 22 | -25.56 | ±1.39 | 1.41  | ±0.20 | 0.72 | <0.001 |
| AP20 | 18 | -24.89 | ±1.37 | 1.83  | ±0.25 | 0.78 | <0.001 |
| AQ20 | 29 | -25.13 | ±1.06 | 2.29  | ±0.19 | 0.85 | <0.001 |
| AR20 | 42 | -24.92 | ±1.13 | 2.66  | ±0.31 | 0.64 | <0.001 |
| AS20 | 35 | -24.71 | ±1.09 | 3.94  | ±0.44 | 0.71 | <0.001 |
| AT20 | 15 | -22.93 | ±0.95 | 5.52  | ±0.43 | 0.93 | <0.001 |
| AU20 | 21 | -23.66 | ±0.72 | 8.04  | ±0.63 | 0.90 | <0.001 |
| AV20 | 24 | -24.83 | ±1.26 | 8.11  | ±0.97 | 0.76 | <0.001 |
| AW20 | 19 | -22.60 | ±0.71 | 7.83  | ±0.58 | 0.92 | <0.001 |
| AX20 | 30 | -19.81 | ±1.51 | 4.36  | ±0.86 | 0.48 | <0.001 |
| AY20 | 18 | -20.92 | ±1.56 | 12.49 | 2.21  | 0.67 | <0.001 |
| AZ20 | 12 | -15.10 | ±1.39 | 9.50  | ±1.96 | 0.70 | 0.001  |
| AA21 | 30 | -10.87 | ±1.82 | -0.03 | ±0.28 | 0.00 | 0.920  |
| AB21 | 44 | -15.00 | ±0.96 | -0.42 | ±0.12 | 0.21 | 0.002  |
| AC21 | 42 | -20.42 | ±0.81 | 0.75  | ±0.08 | 0.69 | <0.001 |
| AD21 | 43 | -16.91 | ±0.68 | 0.04  | ±0.06 | 0.01 | 0.510  |
| AE21 | 38 | -20.66 | ±0.75 | 0.19  | ±0.05 | 0.29 | <0.001 |
| AF21 | 45 | -19.85 | ±0.56 | 0.07  | ±0.04 | 0.05 | 0.126  |
| AG21 | 35 | -20.69 | ±1.31 | 0.42  | ±0.10 | 0.35 | <0.001 |
| AH21 | 40 | -22.14 | ±1.02 | 0.48  | ±0.09 | 0.41 | <0.001 |
| AI21 | 56 | -21.46 | ±0.50 | 0.17  | ±0.03 | 0.37 | <0.001 |
| AJ21 | 56 | -20.59 | ±0.41 | 0.08  | ±0.03 | 0.15 | 0.004  |
| AK21 | 64 | -23.24 | ±0.65 | 0.33  | ±0.04 | 0.57 | <0.001 |
| AL21 | 76 | -24.20 | ±0.54 | 0.35  | ±0.03 | 0.58 | <0.001 |
| AM21 | 50 | -21.60 | ±0.50 | 0.15  | ±0.05 | 0.16 | 0.004  |
| AN21 | 42 | -22.75 | ±0.47 | 0.15  | ±0.05 | 0.15 | 0.010  |
| AO21 | 41 | -23.91 | ±1.21 | 0.72  | ±0.13 | 0.45 | <0.001 |
| AP21 | 79 | -25.07 | ±0.66 | 0.48  | ±0.07 | 0.40 | <0.001 |
| AQ21 | 70 | -26.66 | ±0.91 | 1.66  | ±0.14 | 0.68 | <0.001 |
| AR21 | 58 | -26.04 | ±0.86 | 1.82  | ±0.18 | 0.64 | <0.001 |
| AS21 | 54 | -26.91 | ±1.00 | 1.82  | ±0.23 | 0.54 | <0.001 |
| AT21 | 57 | -25.77 | ±1.14 | 2.20  | ±0.27 | 0.55 | <0.001 |
| AU21 | 49 | -25.71 | ±1.41 | 2.92  | ±0.46 | 0.46 | <0.001 |

*Kalmia latifolia*

|      |    |        |       |       |       |      |        |
|------|----|--------|-------|-------|-------|------|--------|
| AV21 | 46 | -26.52 | ±1.02 | 3.61  | ±0.38 | 0.67 | <0.001 |
| AW21 | 42 | -28.62 | ±1.23 | 5.51  | ±0.49 | 0.76 | <0.001 |
| AX21 | 40 | -24.29 | ±1.22 | 3.57  | ±0.48 | 0.59 | <0.001 |
| AA20 | 22 | -6.05  | ±0.35 | 0.01  | ±0.05 | 0.00 | 0.860  |
| AB20 | 14 | -5.93  | ±0.35 | -0.03 | ±0.06 | 0.02 | 0.607  |
| AC20 | 14 | -6.04  | ±0.28 | 0.08  | ±0.05 | 0.19 | 0.115  |
| AD20 | 18 | -6.70  | ±0.70 | 0.06  | ±0.11 | 0.02 | 0.594  |
| AE20 | 22 | -4.07  | ±0.73 | -0.64 | ±0.06 | 0.87 | <0.001 |
| AF20 | 28 | -5.31  | ±1.68 | -0.76 | ±0.13 | 0.55 | <0.001 |
| AG20 | 39 | -15.68 | ±1.69 | -0.19 | ±0.09 | 0.10 | 0.047  |
| AH20 | 49 | -20.50 | ±0.50 | 0.07  | ±0.03 | 0.12 | 0.016  |
| AI20 | 49 | -23.91 | ±0.49 | 0.05  | ±0.02 | 0.15 | 0.007  |
| AJ20 | 49 | -24.41 | ±0.57 | 0.17  | ±0.03 | 0.42 | <0.001 |
| AK20 | 48 | -22.76 | ±0.68 | 0.11  | ±0.03 | 0.20 | 0.001  |
| AL20 | 37 | -22.68 | ±0.93 | 0.28  | ±0.05 | 0.46 | <0.001 |
| AM20 | 39 | -23.35 | ±0.87 | 0.34  | ±0.05 | 0.54 | <0.001 |
| AN20 | 38 | -22.14 | ±0.93 | 0.21  | ±0.05 | 0.29 | <0.001 |
| AO20 | 47 | -24.71 | ±0.67 | 0.35  | ±0.04 | 0.58 | <0.001 |
| AP20 | 44 | -25.74 | ±0.98 | 0.54  | ±0.08 | 0.50 | <0.001 |
| AQ20 | 44 | -21.93 | ±0.97 | 0.43  | ±0.09 | 0.38 | <0.001 |
| AR20 | 45 | -22.36 | ±0.82 | 0.38  | ±0.07 | 0.41 | <0.001 |
| AS20 | 50 | -21.49 | ±0.89 | 0.29  | ±0.08 | 0.21 | 0.001  |
| AT20 | 48 | -21.11 | ±1.01 | 0.49  | ±0.11 | 0.30 | <0.001 |
| AU20 | 44 | -22.63 | ±0.82 | 0.48  | ±0.11 | 0.31 | <0.001 |
| AV20 | 30 | -21.51 | ±0.97 | 0.37  | ±0.16 | 0.17 | 0.024  |
| AW20 | 64 | -22.28 | ±0.66 | 0.54  | ±0.06 | 0.54 | <0.001 |
| AX20 | 49 | -23.09 | ±0.82 | 0.89  | ±0.12 | 0.55 | <0.001 |
| AY20 | 29 | -20.17 | ±1.06 | 0.93  | ±0.42 | 0.15 | 0.035  |
| AZ20 | 39 | -21.25 | ±0.96 | 0.71  | ±0.20 | 0.26 | 0.001  |
| BA20 | 40 | -18.95 | ±0.65 | 0.70  | ±0.20 | 0.24 | 0.001  |
| AA21 | 6  | -3.74  | ±0.61 | -0.08 | ±0.12 | 0.11 | 0.519  |
| AB21 | 15 | -5.00  | ±0.35 | 0.02  | ±0.07 | 0.01 | 0.738  |
| AC21 | 20 | -5.66  | ±0.69 | -0.03 | ±0.09 | 0.01 | 0.738  |
| AD21 | 26 | -3.54  | ±0.90 | -0.53 | ±0.06 | 0.79 | <0.001 |
| AE21 | 37 | -7.67  | ±1.08 | -0.33 | ±0.06 | 0.46 | <0.001 |
| AF21 | 47 | -13.04 | ±0.83 | -0.17 | ±0.06 | 0.14 | 0.009  |
| AG21 | 39 | -13.69 | ±0.97 | -0.27 | ±0.07 | 0.30 | <0.001 |
| AH21 | 47 | -20.61 | ±0.94 | 0.28  | ±0.09 | 0.19 | 0.002  |
| AI21 | 50 | -17.96 | ±0.75 | 0.00  | ±0.07 | 0.00 | 0.989  |
| AJ21 | 60 | -20.06 | ±0.64 | 0.02  | ±0.04 | 0.00 | 0.625  |

|                        |      |    |        |       |       |       |      |        |
|------------------------|------|----|--------|-------|-------|-------|------|--------|
|                        | AK21 | 66 | -21.77 | ±0.61 | 0.07  | ±0.02 | 0.12 | 0.004  |
|                        | AL21 | 58 | -22.30 | ±0.56 | 0.17  | ±0.03 | 0.37 | <0.001 |
|                        | AM21 | 52 | -23.75 | ±0.69 | 0.11  | ±0.04 | 0.15 | 0.005  |
|                        | AN21 | 58 | -22.04 | ±0.74 | 0.04  | ±0.04 | 0.02 | 0.326  |
|                        | AO21 | 50 | -23.68 | ±0.75 | 0.11  | ±0.06 | 0.06 | 0.088  |
|                        | AP21 | 49 | -23.54 | ±0.75 | 0.15  | ±0.06 | 0.14 | 0.008  |
|                        | AQ21 | 50 | -23.47 | ±0.88 | 0.37  | ±0.07 | 0.37 | <0.001 |
|                        | AR21 | 59 | -22.47 | ±0.73 | 0.14  | ±0.04 | 0.15 | 0.003  |
|                        | AS21 | 49 | -24.95 | ±0.77 | 0.56  | ±0.09 | 0.43 | <0.001 |
|                        | AT21 | 49 | -23.90 | ±0.84 | 0.40  | ±0.11 | 0.23 | 0.001  |
|                        | AU21 | 49 | -23.98 | ±0.81 | 0.73  | ±0.13 | 0.39 | <0.001 |
|                        | AV21 | 59 | -23.51 | ±0.73 | 0.56  | ±0.11 | 0.32 | <0.001 |
|                        | AW21 | 50 | -23.14 | ±0.77 | 0.86  | ±0.16 | 0.39 | <0.001 |
| <i>Larix kaempferi</i> | AA20 | 34 | -9.95  | ±0.98 | 0.00  | ±0.13 | 0.00 | 0.989  |
|                        | AB20 | 30 | -11.69 | ±1.30 | 0.05  | ±0.21 | 0.00 | 0.798  |
|                        | AC20 | 28 | -14.06 | ±1.68 | 0.29  | ±0.29 | 0.04 | 0.312  |
|                        | AD20 | 26 | -12.28 | ±1.30 | -0.21 | ±0.18 | 0.05 | 0.252  |
|                        | AE20 | 38 | -15.39 | ±0.98 | -0.20 | ±0.10 | 0.10 | 0.058  |
|                        | AF20 | 43 | -21.77 | ±0.74 | 0.17  | ±0.08 | 0.09 | 0.046  |
|                        | AG20 | 39 | -21.75 | ±0.44 | -0.07 | ±0.03 | 0.13 | 0.025  |
|                        | AH20 | 32 | -22.48 | ±0.64 | 0.02  | ±0.04 | 0.01 | 0.588  |
|                        | AI20 | 27 | -23.97 | ±0.45 | 0.02  | ±0.02 | 0.05 | 0.246  |
|                        | AJ20 | 29 | -25.24 | ±0.45 | 0.09  | ±0.02 | 0.40 | <0.001 |
|                        | AK20 | 29 | -24.19 | ±0.74 | 0.06  | ±0.04 | 0.09 | 0.108  |
|                        | AL20 | 20 | -26.38 | ±0.87 | 0.36  | ±0.06 | 0.70 | <0.001 |
|                        | AM20 | 23 | -25.54 | ±0.50 | 0.23  | ±0.03 | 0.78 | <0.001 |
|                        | AN20 | 34 | -26.62 | ±1.16 | 0.37  | ±0.06 | 0.54 | <0.001 |
|                        | AO20 | 27 | -24.95 | ±1.35 | 0.45  | ±0.11 | 0.39 | <0.001 |
|                        | AP20 | 36 | -23.21 | ±0.95 | 0.30  | ±0.08 | 0.29 | 0.001  |
|                        | AQ20 | 40 | -23.64 | ±0.79 | 0.53  | ±0.07 | 0.60 | <0.001 |
|                        | AR20 | 41 | -22.70 | ±0.87 | 0.43  | ±0.07 | 0.47 | <0.001 |
|                        | AS20 | 43 | -22.46 | ±0.91 | 0.46  | ±0.08 | 0.44 | <0.001 |
|                        | AT20 | 43 | -22.03 | ±0.83 | 0.44  | ±0.09 | 0.37 | <0.001 |
|                        | AU20 | 34 | -23.06 | ±0.97 | 0.81  | ±0.16 | 0.45 | <0.001 |
|                        | AV20 | 30 | -24.41 | ±0.89 | 1.18  | ±0.25 | 0.45 | <0.001 |
|                        | AW20 | 39 | -24.52 | ±0.78 | 1.09  | ±0.12 | 0.69 | <0.001 |
|                        | AX20 | 51 | -23.57 | ±0.59 | 0.78  | ±0.09 | 0.61 | <0.001 |
|                        | AY20 | 34 | -22.67 | ±0.63 | 1.11  | ±0.18 | 0.53 | <0.001 |
|                        | AZ20 | 40 | -21.24 | ±0.54 | 0.78  | ±0.12 | 0.52 | <0.001 |
|                        | AA21 | 10 | -4.37  | ±0.57 | -0.06 | ±0.09 | 0.05 | 0.554  |

|                                     |    |        |       |       |       |      |        |
|-------------------------------------|----|--------|-------|-------|-------|------|--------|
| AB21                                | 22 | -12.50 | ±1.66 | -0.32 | ±0.21 | 0.11 | 0.137  |
| AC21                                | 48 | -17.68 | ±0.65 | -0.01 | ±0.06 | 0.00 | 0.922  |
| AD21                                | 47 | -17.19 | ±0.68 | -0.18 | ±0.05 | 0.25 | <0.001 |
| AE21                                | 41 | -19.34 | ±0.71 | 0.00  | ±0.04 | 0.00 | 0.912  |
| AF21                                | 44 | -23.69 | ±0.64 | 0.17  | ±0.05 | 0.23 | 0.001  |
| AG21                                | 50 | -20.63 | ±0.53 | 0.03  | ±0.03 | 0.03 | 0.262  |
| AH21                                | 41 | -24.06 | ±0.49 | 0.12  | ±0.04 | 0.16 | 0.009  |
| AI21                                | 62 | -23.98 | ±0.25 | 0.07  | ±0.01 | 0.43 | <0.001 |
| AJ21                                | 57 | -24.09 | ±0.25 | 0.07  | ±0.01 | 0.37 | <0.001 |
| AK21                                | 58 | -24.07 | ±0.34 | 0.08  | ±0.01 | 0.41 | <0.001 |
| AL21                                | 55 | -24.70 | ±0.40 | 0.09  | ±0.02 | 0.37 | <0.001 |
| AM21                                | 50 | -24.80 | ±0.26 | 0.16  | ±0.02 | 0.69 | <0.001 |
| AN21                                | 49 | -23.70 | ±0.29 | 0.03  | ±0.02 | 0.05 | 0.115  |
| AO21                                | 43 | -24.65 | ±0.43 | 0.08  | ±0.04 | 0.12 | 0.026  |
| AP21                                | 40 | -24.92 | ±0.64 | 0.29  | ±0.05 | 0.51 | <0.001 |
| AQ21                                | 46 | -25.47 | ±0.59 | 0.29  | ±0.05 | 0.47 | <0.001 |
| AR21                                | 56 | -26.20 | ±0.64 | 0.33  | ±0.05 | 0.42 | <0.001 |
| AS21                                | 58 | -26.25 | ±0.54 | 0.47  | ±0.05 | 0.63 | <0.001 |
| AT21                                | 46 | -29.05 | ±0.75 | 0.92  | ±0.10 | 0.67 | <0.001 |
| AU21                                | 56 | -25.39 | ±0.61 | 0.53  | ±0.06 | 0.59 | <0.001 |
| AV21                                | 57 | -25.37 | ±0.58 | 0.68  | ±0.08 | 0.55 | <0.001 |
| AW21                                | 55 | -29.08 | ±0.62 | 1.61  | ±0.12 | 0.77 | <0.001 |
| <i>Metasequoia glyptostroboides</i> |    |        |       |       |       |      |        |
| AA20                                | 34 | -9.48  | ±0.72 | 0.05  | ±0.11 | 0.01 | 0.628  |
| AB20                                | 30 | -8.21  | ±1.10 | -0.12 | ±0.19 | 0.01 | 0.552  |
| AC20                                | 21 | -9.71  | ±0.88 | 0.27  | ±0.16 | 0.13 | 0.111  |
| AD20                                | 26 | -9.21  | ±1.04 | 0.02  | ±0.16 | 0.00 | 0.897  |
| AE20                                | 36 | -12.31 | ±1.03 | 0.18  | ±0.13 | 0.06 | 0.165  |
| AF20                                | 58 | -15.47 | ±0.69 | 0.14  | ±0.08 | 0.06 | 0.073  |
| AG20                                | 51 | -19.70 | ±0.49 | 0.31  | ±0.03 | 0.65 | <0.001 |
| AH20                                | 36 | -20.54 | ±0.45 | 0.17  | ±0.03 | 0.54 | <0.001 |
| AI20                                | 34 | -21.22 | ±0.58 | 0.15  | ±0.02 | 0.56 | <0.001 |
| AJ20                                | 38 | -22.38 | ±0.63 | 0.18  | ±0.03 | 0.48 | <0.001 |
| AK20                                | 31 | -22.91 | ±0.90 | 0.44  | ±0.05 | 0.75 | <0.001 |
| AL20                                | 26 | -20.94 | ±1.04 | 0.22  | ±0.06 | 0.34 | 0.002  |
| AM20                                | 25 | -24.02 | ±0.60 | 0.60  | ±0.05 | 0.88 | <0.001 |
| AN20                                | 31 | -22.34 | ±1.12 | 0.50  | ±0.07 | 0.63 | <0.001 |
| AO20                                | 31 | -23.53 | ±1.01 | 0.69  | ±0.07 | 0.76 | <0.001 |
| AP20                                | 32 | -23.76 | ±1.02 | 0.83  | ±0.09 | 0.74 | <0.001 |
| AQ20                                | 35 | -25.05 | ±0.80 | 0.88  | ±0.07 | 0.83 | <0.001 |
| AR20                                | 38 | -24.03 | ±0.82 | 1.04  | ±0.07 | 0.85 | <0.001 |

|                    |      |    |        |       |       |       |      |        |
|--------------------|------|----|--------|-------|-------|-------|------|--------|
|                    | AS20 | 37 | -24.39 | ±0.65 | 1.16  | ±0.06 | 0.92 | <0.001 |
|                    | AT20 | 34 | -23.72 | ±0.76 | 0.91  | ±0.08 | 0.80 | <0.001 |
|                    | AU20 | 47 | -24.20 | ±0.73 | 1.27  | ±0.09 | 0.81 | <0.001 |
|                    | AV20 | 35 | -22.58 | ±0.65 | 0.85  | ±0.07 | 0.81 | <0.001 |
|                    | AW20 | 47 | -23.35 | ±0.62 | 1.11  | ±0.08 | 0.82 | <0.001 |
|                    | AX20 | 43 | -23.00 | ±0.85 | 1.36  | ±0.13 | 0.71 | <0.001 |
|                    | AY20 | 37 | -22.32 | ±0.47 | 1.31  | ±0.09 | 0.85 | <0.001 |
|                    | AZ20 | 42 | -21.90 | ±0.73 | 1.40  | ±0.13 | 0.75 | <0.001 |
|                    | AA21 | 12 | -4.23  | ±0.25 | -0.08 | ±0.03 | 0.34 | 0.047  |
|                    | AB21 | 16 | -4.21  | ±0.54 | 0.00  | ±0.07 | 0.00 | 0.947  |
|                    | AC21 | 36 | -8.08  | ±1.04 | 0.10  | ±0.11 | 0.02 | 0.373  |
|                    | AD21 | 46 | -12.09 | ±0.82 | 0.15  | ±0.06 | 0.13 | 0.013  |
|                    | AE21 | 43 | -18.68 | ±0.69 | 0.37  | ±0.04 | 0.67 | <0.001 |
|                    | AF21 | 47 | -20.60 | ±0.50 | 0.48  | ±0.04 | 0.78 | <0.001 |
|                    | AG21 | 52 | -18.87 | ±0.55 | 0.16  | ±0.03 | 0.41 | <0.001 |
|                    | AH21 | 54 | -20.63 | ±0.45 | 0.22  | ±0.03 | 0.58 | <0.001 |
|                    | AI21 | 63 | -19.95 | ±0.38 | 0.16  | ±0.02 | 0.62 | <0.001 |
|                    | AJ21 | 63 | -20.47 | ±0.43 | 0.19  | ±0.02 | 0.60 | <0.001 |
|                    | AK21 | 65 | -19.97 | ±0.53 | 0.18  | ±0.02 | 0.55 | <0.001 |
|                    | AL21 | 61 | -20.43 | ±0.76 | 0.22  | ±0.03 | 0.41 | <0.001 |
|                    | AM21 | 57 | -21.33 | ±0.56 | 0.24  | ±0.03 | 0.50 | <0.001 |
|                    | AN21 | 56 | -22.04 | ±0.69 | 0.27  | ±0.04 | 0.43 | <0.001 |
|                    | AO21 | 46 | -22.65 | ±0.34 | 0.28  | ±0.03 | 0.69 | <0.001 |
|                    | AP21 | 46 | -21.52 | ±0.30 | 0.21  | ±0.02 | 0.67 | <0.001 |
|                    | AQ21 | 44 | -21.60 | ±0.86 | 0.52  | ±0.07 | 0.58 | <0.001 |
|                    | AR21 | 55 | -23.22 | ±0.84 | 0.65  | ±0.07 | 0.64 | <0.001 |
|                    | AS21 | 52 | -22.50 | ±0.60 | 0.66  | ±0.06 | 0.74 | <0.001 |
|                    | AT21 | 50 | -21.83 | ±0.78 | 0.69  | ±0.07 | 0.64 | <0.001 |
|                    | AU21 | 59 | -22.57 | ±0.49 | 0.77  | ±0.05 | 0.80 | <0.001 |
|                    | AV21 | 51 | -22.26 | ±0.56 | 0.81  | ±0.08 | 0.68 | <0.001 |
|                    | AW21 | 51 | -22.45 | ±0.52 | 0.70  | ±0.08 | 0.59 | <0.001 |
|                    | AX21 | 44 | -21.14 | ±0.26 | 0.63  | ±0.11 | 0.44 | <0.001 |
| <i>Picea abies</i> | AA20 | 39 | -15.98 | ±1.07 | 0.01  | ±0.15 | 0.00 | 0.935  |
|                    | AB20 | 38 | -14.32 | ±1.06 | -0.14 | ±0.17 | 0.02 | 0.403  |
|                    | AC20 | 36 | -15.92 | ±1.24 | -0.23 | ±0.22 | 0.03 | 0.297  |
|                    | AD20 | 34 | -15.77 | ±0.97 | -0.24 | ±0.14 | 0.09 | 0.091  |
|                    | AE20 | 40 | -17.84 | ±0.65 | -0.22 | ±0.08 | 0.17 | 0.008  |
|                    | AF20 | 46 | -18.85 | ±0.53 | -0.22 | ±0.06 | 0.23 | 0.001  |
|                    | AG20 | 35 | -21.09 | ±0.61 | -0.02 | ±0.04 | 0.01 | 0.600  |
|                    | AH20 | 29 | -20.59 | ±0.53 | -0.05 | ±0.03 | 0.11 | 0.082  |



|      |    |        |       |       |       |      |        |
|------|----|--------|-------|-------|-------|------|--------|
| AI20 | 27 | -23.07 | ±0.73 | 0.05  | ±0.03 | 0.11 | 0.089  |
| AJ20 | 25 | -21.19 | ±1.21 | 0.04  | ±0.06 | 0.02 | 0.481  |
| AK20 | 29 | -22.49 | ±0.76 | 0.18  | ±0.04 | 0.45 | <0.001 |
| AL20 | 21 | -23.56 | ±0.74 | 0.13  | ±0.04 | 0.37 | 0.003  |
| AM20 | 21 | -25.54 | ±1.00 | 0.57  | ±0.06 | 0.83 | <0.001 |
| AN20 | 27 | -23.09 | ±1.08 | 0.35  | ±0.06 | 0.58 | <0.001 |
| AO20 | 29 | -25.37 | ±0.75 | 0.63  | ±0.05 | 0.86 | <0.001 |
| AP20 | 28 | -23.47 | ±1.27 | 0.59  | ±0.11 | 0.54 | <0.001 |
| AQ20 | 29 | -25.19 | ±0.91 | 0.83  | ±0.08 | 0.80 | <0.001 |
| AR20 | 30 | -23.62 | ±0.65 | 0.65  | ±0.06 | 0.81 | <0.001 |
| AS20 | 38 | -23.58 | ±1.02 | 0.60  | ±0.09 | 0.55 | <0.001 |
| AT20 | 35 | -23.52 | ±0.57 | 0.63  | ±0.06 | 0.75 | <0.001 |
| AU20 | 35 | -23.39 | ±0.72 | 0.70  | ±0.10 | 0.58 | <0.001 |
| AV20 | 30 | -24.48 | ±0.54 | 0.99  | ±0.10 | 0.78 | <0.001 |
| AW20 | 31 | -25.27 | ±0.49 | 0.72  | ±0.08 | 0.75 | <0.001 |
| AX20 | 35 | -24.79 | ±0.35 | 1.36  | ±0.07 | 0.93 | <0.001 |
| AY20 | 22 | -25.41 | ±0.63 | 2.44  | ±0.25 | 0.83 | <0.001 |
| AZ20 | 32 | -23.09 | ±0.66 | 0.86  | ±0.14 | 0.55 | <0.001 |
| BA20 | 41 | -23.73 | ±0.45 | 1.40  | ±0.14 | 0.72 | <0.001 |
| AA21 | 20 | -18.46 | ±0.56 | -0.06 | ±0.09 | 0.02 | 0.515  |
| AB21 | 40 | -17.39 | ±0.70 | -0.37 | ±0.09 | 0.33 | <0.001 |
| AC21 | 48 | -17.97 | ±0.60 | -0.22 | ±0.06 | 0.26 | <0.001 |
| AD21 | 44 | -19.96 | ±0.58 | -0.16 | ±0.06 | 0.15 | 0.008  |
| AE21 | 38 | -19.50 | ±0.65 | -0.06 | ±0.04 | 0.06 | 0.155  |
| AF21 | 37 | -21.24 | ±0.62 | 0.04  | ±0.04 | 0.02 | 0.435  |
| AG21 | 36 | -22.07 | ±0.43 | 0.06  | ±0.03 | 0.10 | 0.056  |
| AH21 | 43 | -21.17 | ±0.50 | 0.03  | ±0.03 | 0.04 | 0.211  |
| AI21 | 31 | -20.82 | ±0.54 | -0.09 | ±0.05 | 0.10 | 0.091  |
| AJ21 | 44 | -21.25 | ±0.33 | 0.00  | ±0.02 | 0.00 | 0.822  |
| AK21 | 47 | -22.91 | ±0.34 | 0.06  | ±0.02 | 0.24 | <0.001 |
| AL21 | 56 | -22.22 | ±0.61 | 0.17  | ±0.03 | 0.44 | <0.001 |
| AM21 | 40 | -23.70 | ±0.84 | 0.22  | ±0.05 | 0.36 | <0.001 |
| AN21 | 50 | -22.40 | ±0.82 | 0.18  | ±0.05 | 0.22 | 0.001  |
| AO21 | 44 | -22.61 | ±0.60 | 0.33  | ±0.05 | 0.52 | <0.001 |
| AP21 | 47 | -23.80 | ±0.69 | 0.34  | ±0.05 | 0.50 | <0.001 |
| AQ21 | 42 | -23.24 | ±0.90 | 0.48  | ±0.07 | 0.54 | <0.001 |
| AR21 | 37 | -23.61 | ±0.79 | 0.50  | ±0.07 | 0.60 | <0.001 |
| AS21 | 45 | -23.48 | ±0.94 | 0.63  | ±0.08 | 0.57 | <0.001 |
| AT21 | 48 | -24.57 | ±0.62 | 0.77  | ±0.08 | 0.67 | <0.001 |
| AU21 | 47 | -24.83 | ±0.99 | 0.74  | ±0.14 | 0.38 | <0.001 |

*Prunus armeniaca*

|      |    |        |       |       |       |      |        |
|------|----|--------|-------|-------|-------|------|--------|
| AV21 | 43 | -25.50 | ±1.09 | 1.18  | ±0.16 | 0.57 | <0.001 |
| AW21 | 46 | -25.13 | ±0.68 | 1.19  | ±0.14 | 0.63 | <0.001 |
| AX21 | 43 | -24.26 | ±0.81 | 1.74  | ±0.32 | 0.43 | <0.001 |
| AA20 | 21 | -5.54  | ±0.62 | 0.01  | ±0.09 | 0.00 | 0.951  |
| AB20 | 24 | -4.87  | ±0.62 | 0.08  | ±0.10 | 0.03 | 0.410  |
| AC20 | 19 | -4.62  | ±0.75 | -0.01 | ±0.13 | 0.00 | 0.934  |
| AD20 | 28 | -4.75  | ±0.88 | -0.30 | ±0.13 | 0.18 | 0.025  |
| AE20 | 39 | -6.75  | ±0.89 | -0.27 | ±0.08 | 0.24 | 0.001  |
| AF20 | 60 | -10.71 | ±0.69 | -0.18 | ±0.07 | 0.09 | 0.021  |
| AG20 | 56 | -15.18 | ±0.56 | 0.11  | ±0.04 | 0.14 | 0.004  |
| AH20 | 45 | -16.13 | ±0.65 | 0.13  | ±0.04 | 0.22 | 0.001  |
| AI20 | 34 | -17.22 | ±0.68 | 0.18  | ±0.03 | 0.47 | <0.001 |
| AJ20 | 35 | -19.09 | ±0.59 | 0.27  | ±0.04 | 0.61 | <0.001 |
| AK20 | 25 | -20.71 | ±0.75 | 0.45  | ±0.08 | 0.60 | <0.001 |
| AL20 | 16 | -21.12 | ±0.96 | 0.57  | ±0.08 | 0.78 | <0.001 |
| AM20 | 20 | -22.00 | ±0.94 | 0.54  | ±0.08 | 0.72 | <0.001 |
| AN20 | 27 | -22.17 | ±1.10 | 0.62  | ±0.10 | 0.63 | <0.001 |
| AO20 | 27 | -22.07 | ±0.49 | 0.65  | ±0.05 | 0.85 | <0.001 |
| AP20 | 39 | -21.71 | ±0.65 | 0.62  | ±0.07 | 0.68 | <0.001 |
| AQ20 | 43 | -21.08 | ±0.67 | 0.65  | ±0.06 | 0.73 | <0.001 |
| AR20 | 27 | -19.21 | ±0.97 | 1.14  | ±0.19 | 0.59 | <0.001 |
| AS20 | 18 | -20.84 | ±0.87 | 2.70  | ±0.31 | 0.83 | <0.001 |
| AT20 | 17 | -18.25 | ±0.77 | 3.61  | ±0.40 | 0.84 | <0.001 |
| AU20 | 21 | -18.84 | ±1.27 | 4.72  | ±0.91 | 0.59 | <0.001 |
| AV20 | 20 | -18.12 | ±1.07 | 5.80  | ±0.75 | 0.77 | <0.001 |
| AW20 | 46 | -12.81 | ±1.19 | 2.06  | ±0.49 | 0.29 | <0.001 |
| AX20 | 28 | -13.74 | ±1.09 | 4.41  | ±0.71 | 0.59 | <0.001 |
| AY20 | 20 | -14.89 | ±1.00 | 7.59  | ±1.25 | 0.67 | <0.001 |
| AZ20 | 11 | -15.60 | ±0.36 | 11.00 | ±0.85 | 0.95 | <0.001 |
| AA21 | 10 | -4.74  | ±0.54 | 0.11  | ±0.08 | 0.21 | 0.183  |
| AB21 | 24 | -2.29  | ±1.18 | -0.67 | ±0.14 | 0.49 | <0.001 |
| AC21 | 37 | -14.47 | ±1.14 | 0.28  | ±0.10 | 0.20 | 0.006  |
| AD21 | 43 | -10.67 | ±1.15 | 0.11  | ±0.08 | 0.04 | 0.175  |
| AE21 | 39 | -13.73 | ±0.89 | 0.15  | ±0.05 | 0.20 | 0.005  |
| AF21 | 38 | -13.98 | ±0.77 | 0.18  | ±0.05 | 0.24 | 0.002  |
| AG21 | 55 | -15.63 | ±0.52 | 0.12  | ±0.04 | 0.16 | 0.002  |
| AH21 | 50 | -18.24 | ±0.67 | 0.27  | ±0.06 | 0.28 | <0.001 |
| AI21 | 56 | -17.90 | ±0.74 | 0.21  | ±0.07 | 0.15 | 0.003  |
| AJ21 | 69 | -16.88 | ±0.50 | 0.31  | ±0.05 | 0.42 | <0.001 |
| AK21 | 65 | -20.61 | ±0.54 | 0.55  | ±0.05 | 0.69 | <0.001 |

|                     |      |    |        |       |       |       |      |        |
|---------------------|------|----|--------|-------|-------|-------|------|--------|
|                     | AL21 | 82 | -18.78 | ±0.43 | 0.23  | ±0.03 | 0.35 | <0.001 |
|                     | AM21 | 55 | -21.00 | ±0.47 | 0.53  | ±0.04 | 0.73 | <0.001 |
|                     | AN21 | 56 | -21.83 | ±0.65 | 0.59  | ±0.06 | 0.68 | <0.001 |
|                     | AO21 | 53 | -21.78 | ±0.73 | 0.73  | ±0.06 | 0.74 | <0.001 |
|                     | AP21 | 89 | -21.14 | ±0.51 | 0.67  | ±0.05 | 0.65 | <0.001 |
|                     | AQ21 | 89 | -20.92 | ±0.44 | 0.72  | ±0.06 | 0.62 | <0.001 |
|                     | AR21 | 85 | -20.35 | ±0.54 | 0.91  | ±0.08 | 0.62 | <0.001 |
|                     | AS21 | 65 | -18.85 | ±0.83 | 1.21  | ±0.15 | 0.50 | <0.001 |
|                     | AT21 | 63 | -18.52 | ±0.80 | 1.52  | ±0.18 | 0.54 | <0.001 |
|                     | AU21 | 56 | -18.31 | ±1.05 | 2.49  | ±0.35 | 0.49 | <0.001 |
|                     | AV21 | 42 | -18.69 | ±1.16 | 3.52  | ±0.47 | 0.58 | <0.001 |
|                     | AW21 | 48 | -18.58 | ±1.07 | 3.65  | ±0.44 | 0.60 | <0.001 |
|                     | AX21 | 27 | -18.16 | ±0.86 | 7.65  | ±0.69 | 0.83 | <0.001 |
| <i>Prunus nigra</i> | AA20 | 26 | -5.23  | ±1.00 | -0.08 | ±0.13 | 0.01 | 0.560  |
|                     | AB20 | 22 | -7.69  | ±0.92 | 0.49  | ±0.16 | 0.32 | 0.006  |
|                     | AC20 | 18 | -5.34  | ±0.44 | 0.18  | ±0.09 | 0.20 | 0.063  |
|                     | AD20 | 14 | -4.49  | ±0.68 | 0.02  | ±0.11 | 0.00 | 0.848  |
|                     | AE20 | 15 | -4.26  | ±0.30 | 0.05  | ±0.04 | 0.09 | 0.266  |
|                     | AF20 | 21 | -4.14  | ±0.22 | 0.07  | ±0.03 | 0.18 | 0.057  |
|                     | AG20 | 11 | -3.19  | ±0.20 | -0.03 | ±0.02 | 0.23 | 0.135  |
|                     | AH20 | 14 | -6.64  | 2.17  | -0.32 | ±0.10 | 0.46 | 0.008  |
|                     | AI20 | 24 | -15.69 | ±1.29 | -0.08 | ±0.05 | 0.12 | 0.100  |
|                     | AJ20 | 19 | -20.83 | ±1.10 | 0.13  | ±0.06 | 0.26 | 0.025  |
|                     | AK20 | 22 | -25.19 | ±1.38 | 0.27  | ±0.06 | 0.47 | <0.001 |
|                     | AL20 | 15 | -13.94 | ±1.15 | 0.27  | ±0.07 | 0.51 | 0.003  |
|                     | AM20 | 13 | -23.01 | ±1.25 | 0.33  | ±0.09 | 0.55 | 0.004  |
|                     | AN20 | 31 | -26.96 | ±1.00 | 0.44  | ±0.06 | 0.64 | <0.001 |
|                     | AO20 | 29 | -28.51 | ±0.89 | 0.45  | ±0.05 | 0.72 | <0.001 |
|                     | AP20 | 29 | -26.00 | ±0.87 | 0.39  | ±0.08 | 0.48 | <0.001 |
|                     | AQ20 | 27 | -29.47 | ±0.72 | 0.78  | ±0.08 | 0.79 | <0.001 |
|                     | AR20 | 26 | -26.35 | ±1.24 | 0.73  | ±0.10 | 0.71 | <0.001 |
|                     | AS20 | 33 | -26.93 | ±1.07 | 1.11  | ±0.08 | 0.85 | <0.001 |
|                     | AT20 | 24 | -27.43 | ±1.23 | 0.85  | ±0.12 | 0.70 | <0.001 |
|                     | AU20 | 23 | -24.67 | ±1.01 | 0.81  | ±0.19 | 0.46 | <0.001 |
|                     | AV20 | 21 | -23.81 | ±0.80 | 1.24  | ±0.31 | 0.46 | 0.001  |
|                     | AW20 | 31 | -22.55 | ±1.06 | 1.23  | ±0.21 | 0.54 | <0.001 |
|                     | AX20 | 26 | -21.49 | ±0.69 | 1.92  | ±0.26 | 0.69 | <0.001 |
|                     | AY20 | 23 | -20.41 | ±0.52 | 1.25  | ±0.21 | 0.62 | <0.001 |
|                     | AZ20 | 22 | -14.98 | ±1.46 | 1.55  | ±0.46 | 0.36 | 0.003  |
|                     | AA21 | 9  | -3.90  | ±0.50 | 0.00  | ±0.07 | 0.00 | 0.958  |

|                                   |    |        |       |       |       |      |        |
|-----------------------------------|----|--------|-------|-------|-------|------|--------|
| AB21                              | 15 | -3.61  | ±1.65 | -0.26 | ±0.22 | 0.09 | 0.275  |
| AC21                              | 18 | -5.19  | ±0.64 | 0.10  | ±0.07 | 0.11 | 0.173  |
| AD21                              | 19 | -3.59  | ±0.92 | -0.18 | ±0.07 | 0.30 | 0.016  |
| AE21                              | 19 | -6.01  | ±1.13 | -0.54 | ±0.06 | 0.82 | <0.001 |
| AF21                              | 14 | -2.12  | 2.91  | -0.89 | ±0.19 | 0.65 | 0.001  |
| AG21                              | 21 | -9.61  | ±1.89 | -0.43 | ±0.12 | 0.41 | 0.002  |
| AH21                              | 20 | -18.83 | ±1.18 | -0.06 | ±0.10 | 0.02 | 0.580  |
| AI21                              | 31 | -19.46 | ±1.04 | -0.05 | ±0.08 | 0.01 | 0.525  |
| AJ21                              | 34 | -18.73 | ±1.06 | -0.12 | ±0.09 | 0.06 | 0.168  |
| AK21                              | 57 | -21.24 | ±0.65 | 0.07  | ±0.03 | 0.09 | 0.021  |
| AL21                              | 48 | -24.37 | ±0.73 | 0.24  | ±0.03 | 0.56 | <0.001 |
| AM21                              | 41 | -22.60 | ±0.85 | 0.22  | ±0.05 | 0.35 | <0.001 |
| AN21                              | 46 | -22.37 | ±0.79 | 0.19  | ±0.05 | 0.27 | <0.001 |
| AO21                              | 50 | -24.93 | ±0.84 | 0.40  | ±0.06 | 0.46 | <0.001 |
| AP21                              | 49 | -23.94 | ±0.89 | 0.34  | ±0.07 | 0.32 | <0.001 |
| AQ21                              | 45 | -24.90 | ±0.94 | 0.56  | ±0.07 | 0.57 | <0.001 |
| AR21                              | 51 | -26.85 | ±0.74 | 0.55  | ±0.06 | 0.66 | <0.001 |
| AS21                              | 51 | -24.34 | ±0.96 | 0.53  | ±0.12 | 0.28 | <0.001 |
| AT21                              | 56 | -26.48 | ±0.85 | 0.75  | ±0.12 | 0.41 | <0.001 |
| AU21                              | 44 | -28.91 | ±1.04 | 1.35  | ±0.17 | 0.60 | <0.001 |
| AV21                              | 51 | -24.66 | ±0.78 | 0.79  | ±0.13 | 0.44 | <0.001 |
| AW21                              | 69 | -25.62 | ±0.67 | 1.84  | ±0.18 | 0.60 | <0.001 |
| <i>Rhododendron calendulaceum</i> |    |        |       |       |       |      |        |
| AB20                              | 16 | -9.27  | ±0.95 | 0.12  | ±0.14 | 0.05 | 0.428  |
| AC20                              | 23 | -8.43  | ±0.73 | 0.02  | ±0.14 | 0.00 | 0.863  |
| AD20                              | 48 | -14.43 | ±0.83 | 0.08  | ±0.12 | 0.01 | 0.525  |
| AE20                              | 59 | -15.01 | ±0.62 | 0.01  | ±0.06 | 0.00 | 0.857  |
| AF20                              | 75 | -17.47 | ±0.55 | 0.01  | ±0.06 | 0.00 | 0.933  |
| AG20                              | 59 | -17.76 | ±0.63 | -0.02 | ±0.04 | 0.01 | 0.576  |
| AH20                              | 39 | -20.14 | ±0.74 | 0.10  | ±0.06 | 0.07 | 0.106  |
| AI20                              | 30 | -23.58 | ±0.43 | 0.12  | ±0.03 | 0.42 | <0.001 |
| AJ20                              | 40 | -24.81 | ±0.42 | 0.11  | ±0.03 | 0.25 | 0.001  |
| AK20                              | 40 | -22.48 | ±0.55 | 0.10  | ±0.03 | 0.19 | 0.005  |
| AL20                              | 38 | -25.76 | ±0.55 | 0.27  | ±0.03 | 0.68 | <0.001 |
| AM20                              | 30 | -26.86 | ±0.50 | 0.31  | ±0.05 | 0.59 | <0.001 |
| AN20                              | 48 | -25.53 | ±0.60 | 0.20  | ±0.03 | 0.43 | <0.001 |
| AO20                              | 49 | -28.53 | ±0.59 | 0.41  | ±0.04 | 0.71 | <0.001 |
| AP20                              | 39 | -26.42 | ±0.52 | 0.35  | ±0.06 | 0.52 | <0.001 |
| AQ20                              | 48 | -25.60 | ±0.46 | 0.25  | ±0.04 | 0.44 | <0.001 |
| AR20                              | 39 | -24.63 | ±0.61 | 0.22  | ±0.07 | 0.19 | 0.005  |
| AS20                              | 37 | -26.19 | ±0.67 | 0.34  | ±0.08 | 0.35 | <0.001 |

|      |    |        |       |       |       |      |        |
|------|----|--------|-------|-------|-------|------|--------|
| AT20 | 49 | -25.41 | ±0.53 | 0.22  | ±0.06 | 0.23 | <0.001 |
| AU20 | 50 | -26.41 | ±0.62 | 0.40  | ±0.09 | 0.31 | <0.001 |
| AV20 | 40 | -26.06 | ±0.45 | 0.36  | ±0.08 | 0.34 | <0.001 |
| AW20 | 30 | -26.91 | ±0.58 | 0.54  | ±0.07 | 0.66 | <0.001 |
| AX20 | 50 | -27.98 | ±0.39 | 0.51  | ±0.06 | 0.63 | <0.001 |
| AY20 | 40 | -27.18 | ±0.30 | 0.43  | ±0.06 | 0.62 | <0.001 |
| AZ20 | 40 | -25.69 | ±0.42 | 0.52  | ±0.09 | 0.48 | <0.001 |
| AA21 | 35 | -10.32 | ±0.58 | -0.12 | ±0.09 | 0.05 | 0.189  |
| AB21 | 50 | -10.66 | ±0.90 | -0.07 | ±0.11 | 0.01 | 0.527  |
| AC21 | 50 | -14.26 | ±0.98 | -0.04 | ±0.12 | 0.00 | 0.744  |
| AD21 | 60 | -18.08 | ±0.60 | 0.13  | ±0.04 | 0.14 | 0.003  |
| AE21 | 50 | -16.92 | ±0.65 | 0.08  | ±0.04 | 0.08 | 0.047  |
| AF21 | 50 | -18.60 | ±0.81 | 0.14  | ±0.06 | 0.11 | 0.020  |
| AG21 | 50 | -19.10 | ±0.55 | 0.03  | ±0.04 | 0.01 | 0.476  |
| AH21 | 50 | -22.62 | ±0.61 | 0.22  | ±0.06 | 0.24 | <0.001 |
| AI21 | 50 | -20.73 | ±0.63 | 0.01  | ±0.06 | 0.00 | 0.830  |
| AJ21 | 60 | -21.31 | ±0.51 | 0.04  | ±0.03 | 0.03 | 0.201  |
| AK21 | 59 | -21.79 | ±0.44 | 0.07  | ±0.02 | 0.13 | 0.004  |
| AL21 | 60 | -21.44 | ±0.47 | 0.06  | ±0.03 | 0.08 | 0.033  |
| AM21 | 59 | -23.39 | ±0.49 | 0.18  | ±0.03 | 0.39 | <0.001 |
| AN21 | 60 | -23.22 | ±0.50 | 0.13  | ±0.03 | 0.23 | <0.001 |
| AO21 | 49 | -24.82 | ±0.72 | 0.22  | ±0.06 | 0.22 | 0.001  |
| AP21 | 49 | -25.11 | ±0.57 | 0.25  | ±0.04 | 0.41 | <0.001 |
| AQ21 | 47 | -24.21 | ±0.62 | 0.27  | ±0.05 | 0.40 | <0.001 |
| AR21 | 50 | -25.54 | ±0.72 | 0.33  | ±0.06 | 0.38 | <0.001 |
| AS21 | 49 | -25.23 | ±0.58 | 0.30  | ±0.07 | 0.30 | <0.001 |
| AT21 | 50 | -26.61 | ±0.63 | 0.40  | ±0.08 | 0.33 | <0.001 |
| AU21 | 50 | -26.85 | ±0.65 | 0.55  | ±0.11 | 0.36 | <0.001 |
| AV21 | 50 | -27.00 | ±0.71 | 0.53  | ±0.14 | 0.24 | <0.001 |
| AW21 | 50 | -28.13 | ±0.61 | 0.60  | ±0.12 | 0.33 | <0.001 |
| AX21 | 50 | -27.12 | ±0.76 | 0.36  | ±0.31 | 0.03 | 0.248  |

**Table S5. Estimates, fitness statistics, and displays associated with linear regressions for each temperature and species.**

| Species                  | Chill | T (°C) | n   | $\alpha \pm$ error | $\beta \pm$ error | $r^2$ | P-value |
|--------------------------|-------|--------|-----|--------------------|-------------------|-------|---------|
| <i>Abies balsamea</i>    | 54    | 2      | 26  | -28.22 $\pm$ 0.34  | 0.09 $\pm$ 0.01   | 0.66  | <0.001  |
|                          |       | 4      | 34  | -25.34 $\pm$ 1.44  | 0.42 $\pm$ 0.06   | 0.63  | <0.001  |
|                          |       | 7      | 34  | -25.50 $\pm$ 2.32  | 0.27 $\pm$ 0.12   | 0.14  | 0.027   |
|                          |       | 11     | 33  | -23.75 $\pm$ 2.72  | 0.51 $\pm$ 0.19   | 0.19  | 0.010   |
|                          |       | 15     | 38  | -24.39 $\pm$ 2.32  | 0.71 $\pm$ 0.19   | 0.29  | 0.001   |
|                          |       | 22     | 45  | -28.00 $\pm$ 0.51  | 0.54 $\pm$ 0.04   | 0.78  | <0.001  |
|                          |       | 30     | 31  | -25.81 $\pm$ 0.69  | 1.15 $\pm$ 0.15   | 0.66  | <0.001  |
|                          | 82    | 2      | 39  | -27.93 $\pm$ 0.41  | 0.04 $\pm$ 0.02   | 0.09  | 0.070   |
|                          |       | 4      | 38  | -26.99 $\pm$ 0.25  | 0.02 $\pm$ 0.01   | 0.04  | 0.252   |
|                          |       | 7      | 49  | -27.08 $\pm$ 0.30  | 0.01 $\pm$ 0.02   | 0.00  | 0.765   |
|                          |       | 11     | 48  | -27.52 $\pm$ 0.60  | 0.19 $\pm$ 0.03   | 0.43  | <0.001  |
|                          |       | 15     | 46  | -27.65 $\pm$ 0.69  | 0.68 $\pm$ 0.08   | 0.64  | <0.001  |
|                          |       | 22     | 52  | -26.10 $\pm$ 0.63  | 0.75 $\pm$ 0.08   | 0.64  | <0.001  |
|                          |       | 30     | 65  | -28.12 $\pm$ 0.53  | 1.49 $\pm$ 0.13   | 0.67  | <0.001  |
| <i>Acer rubrum</i>       | 54    | 2      | 30  | -25.86 $\pm$ 0.67  | -0.02 $\pm$ 0.03  | 0.01  | 0.539   |
|                          |       | 4      | 40  | -26.89 $\pm$ 0.70  | 0.04 $\pm$ 0.03   | 0.07  | 0.090   |
|                          |       | 7      | 50  | -25.90 $\pm$ 0.87  | 0.04 $\pm$ 0.03   | 0.03  | 0.226   |
|                          |       | 11     | 60  | -25.36 $\pm$ 0.85  | 0.10 $\pm$ 0.04   | 0.11  | 0.009   |
|                          |       | 15     | 50  | -26.44 $\pm$ 0.95  | 0.27 $\pm$ 0.04   | 0.48  | <0.001  |
|                          |       | 22     | 70  | -25.56 $\pm$ 0.71  | 0.28 $\pm$ 0.06   | 0.23  | <0.001  |
|                          |       | 30     | 70  | -25.27 $\pm$ 0.56  | 0.56 $\pm$ 0.07   | 0.50  | <0.001  |
|                          | 82    | 2      | 70  | -25.36 $\pm$ 0.70  | 0.19 $\pm$ 0.03   | 0.34  | <0.001  |
|                          |       | 4      | 78  | -24.50 $\pm$ 0.46  | 0.19 $\pm$ 0.02   | 0.50  | <0.001  |
|                          |       | 7      | 100 | -24.58 $\pm$ 0.59  | 0.40 $\pm$ 0.03   | 0.59  | <0.001  |
|                          |       | 11     | 88  | -24.67 $\pm$ 0.44  | 0.72 $\pm$ 0.05   | 0.72  | <0.001  |
|                          |       | 15     | 88  | -24.00 $\pm$ 0.59  | 1.09 $\pm$ 0.09   | 0.63  | <0.001  |
|                          |       | 22     | 90  | -23.54 $\pm$ 0.61  | 1.48 $\pm$ 0.11   | 0.67  | <0.001  |
|                          |       | 30     | 58  | -23.05 $\pm$ 0.95  | 2.95 $\pm$ 0.31   | 0.62  | <0.001  |
| <i>Cercis canadensis</i> | 54    | 2      | 30  | -16.41 $\pm$ 0.61  | -0.02 $\pm$ 0.02  | 0.02  | 0.430   |
|                          |       | 4      | 40  | -15.74 $\pm$ 0.42  | -0.02 $\pm$ 0.02  | 0.05  | 0.150   |
|                          |       | 7      | 47  | -18.25 $\pm$ 0.75  | 0.15 $\pm$ 0.03   | 0.43  | <0.001  |
|                          |       | 11     | 59  | -17.11 $\pm$ 0.84  | 0.14 $\pm$ 0.04   | 0.21  | <0.001  |
|                          |       | 15     | 40  | -16.45 $\pm$ 0.53  | 0.24 $\pm$ 0.03   | 0.58  | <0.001  |
|                          |       | 22     | 79  | -17.59 $\pm$ 0.36  | 0.49 $\pm$ 0.04   | 0.71  | <0.001  |
|                          |       | 30     | 89  | -15.17 $\pm$ 0.26  | 0.50 $\pm$ 0.04   | 0.70  | <0.001  |

|                               |    |    |     |        |       |       |       |      |        |
|-------------------------------|----|----|-----|--------|-------|-------|-------|------|--------|
|                               | 82 | 2  | 66  | -15.43 | ±0.46 | 0.13  | ±0.02 | 0.40 | <0.001 |
|                               |    | 4  | 63  | -13.99 | ±0.32 | 0.14  | ±0.01 | 0.60 | <0.001 |
|                               |    | 7  | 72  | -14.72 | ±0.33 | 0.26  | ±0.02 | 0.71 | <0.001 |
|                               |    | 11 | 60  | -14.29 | ±0.37 | 0.43  | ±0.04 | 0.67 | <0.001 |
|                               |    | 15 | 80  | -14.74 | ±0.34 | 0.59  | ±0.05 | 0.67 | <0.001 |
|                               |    | 22 | 66  | -14.30 | ±0.42 | 0.88  | ±0.07 | 0.69 | <0.001 |
|                               |    | 30 | 55  | -14.32 | ±0.57 | 1.25  | ±0.15 | 0.55 | <0.001 |
| <i>Cornus florida</i>         | 54 | 2  | 30  | -23.69 | ±0.49 | 0.01  | ±0.02 | 0.02 | 0.457  |
|                               |    | 4  | 30  | -23.68 | ±0.49 | 0.03  | ±0.02 | 0.07 | 0.148  |
|                               |    | 7  | 50  | -24.34 | ±0.41 | -0.01 | ±0.01 | 0.00 | 0.636  |
|                               |    | 11 | 60  | -23.06 | ±0.69 | -0.01 | ±0.03 | 0.00 | 0.596  |
|                               |    | 15 | 50  | -23.80 | ±0.61 | 0.10  | ±0.03 | 0.23 | <0.001 |
|                               |    | 22 | 70  | -23.87 | ±0.63 | 0.37  | ±0.05 | 0.41 | <0.001 |
|                               |    | 30 | 60  | -23.33 | ±0.61 | 0.42  | ±0.07 | 0.38 | <0.001 |
| <i>Cornus mas</i>             | 54 | 2  | 40  | -20.88 | ±0.84 | 0.05  | ±0.04 | 0.05 | 0.172  |
|                               |    | 4  | 40  | -20.90 | ±0.62 | 0.03  | ±0.03 | 0.03 | 0.310  |
|                               |    | 7  | 70  | -21.10 | ±0.61 | 0.06  | ±0.02 | 0.08 | 0.019  |
|                               |    | 11 | 70  | -21.19 | ±0.70 | 0.23  | ±0.04 | 0.33 | <0.001 |
|                               |    | 15 | 90  | -20.75 | ±0.77 | 0.23  | ±0.08 | 0.09 | 0.004  |
|                               |    | 22 | 80  | -20.30 | ±0.72 | 0.91  | ±0.16 | 0.30 | <0.001 |
|                               |    | 30 | 80  | -20.09 | ±0.68 | 1.14  | ±0.13 | 0.50 | <0.001 |
|                               | 82 | 2  | 50  | -21.27 | ±0.52 | 0.12  | ±0.03 | 0.30 | <0.001 |
|                               |    | 4  | 90  | -21.37 | ±0.64 | 0.12  | ±0.03 | 0.17 | <0.001 |
|                               |    | 7  | 110 | -21.19 | ±0.47 | 0.22  | ±0.03 | 0.33 | <0.001 |
|                               |    | 11 | 80  | -19.73 | ±0.63 | 0.30  | ±0.10 | 0.10 | 0.004  |
|                               |    | 15 | 90  | -18.40 | ±0.91 | 0.69  | ±0.16 | 0.17 | <0.001 |
|                               |    | 22 | 48  | -19.70 | ±0.91 | 1.81  | ±0.26 | 0.52 | <0.001 |
|                               |    | 30 | 39  | -18.94 | ±1.11 | 2.98  | ±0.60 | 0.40 | <0.001 |
| <i>Fagus grandifolia</i>      | 54 | 2  | 25  | -18.53 | ±0.43 | 0.06  | ±0.02 | 0.42 | <0.001 |
|                               |    | 4  | 28  | -18.59 | ±0.32 | 0.07  | ±0.01 | 0.55 | <0.001 |
|                               |    | 7  | 30  | -18.62 | ±0.32 | 0.12  | ±0.01 | 0.71 | <0.001 |
|                               |    | 11 | 35  | -17.57 | ±0.79 | 0.14  | ±0.04 | 0.26 | 0.002  |
|                               |    | 15 | 44  | -17.54 | ±0.36 | 0.06  | ±0.02 | 0.28 | <0.001 |
|                               |    | 22 | 43  | -18.32 | ±0.31 | 0.26  | ±0.02 | 0.74 | <0.001 |
|                               |    | 30 | 46  | -17.46 | ±0.37 | 0.45  | ±0.04 | 0.74 | <0.001 |
| <i>Forsythia 'Meadowlark'</i> | 54 | 2  | 34  | -22.94 | ±0.68 | 0.02  | ±0.03 | 0.02 | 0.435  |
|                               |    | 4  | 43  | -23.11 | ±0.52 | 0.07  | ±0.02 | 0.21 | 0.002  |

|                         |    |    |     |        |       |       |       |      |        |
|-------------------------|----|----|-----|--------|-------|-------|-------|------|--------|
|                         |    | 7  | 55  | -24.52 | ±1.20 | 0.29  | ±0.06 | 0.32 | <0.001 |
|                         |    | 11 | 56  | -23.15 | ±1.70 | 0.66  | ±0.13 | 0.33 | <0.001 |
|                         |    | 15 | 60  | -23.57 | ±1.19 | 0.90  | ±0.14 | 0.42 | <0.001 |
|                         |    | 22 | 65  | -23.82 | ±1.18 | 1.43  | ±0.25 | 0.34 | <0.001 |
|                         |    | 30 | 81  | -22.59 | ±1.19 | 1.33  | ±0.21 | 0.34 | <0.001 |
|                         | 82 | 2  | 92  | -21.42 | ±1.18 | 0.20  | ±0.05 | 0.15 | <0.001 |
|                         |    | 4  | 121 | -20.46 | ±0.76 | 0.21  | ±0.04 | 0.20 | <0.001 |
|                         |    | 7  | 75  | -22.80 | ±1.24 | 1.26  | ±0.18 | 0.41 | <0.001 |
|                         |    | 11 | 56  | -23.57 | ±1.13 | 2.20  | ±0.27 | 0.56 | <0.001 |
|                         |    | 15 | 31  | -23.61 | ±1.28 | 4.06  | ±0.72 | 0.52 | <0.001 |
|                         |    | 22 | 27  | -20.69 | ±2.00 | 6.58  | ±1.48 | 0.44 | <0.001 |
|                         |    | 30 | 28  | -20.10 | ±1.76 | 6.35  | ±1.09 | 0.57 | <0.001 |
| <i>Kalmia latifolia</i> | 54 | 2  | 29  | -22.71 | ±1.07 | -0.03 | ±0.04 | 0.02 | 0.506  |
|                         |    | 4  | 30  | -22.00 | ±0.86 | -0.06 | ±0.03 | 0.10 | 0.089  |
|                         |    | 7  | 49  | -23.49 | ±0.84 | -0.02 | ±0.03 | 0.02 | 0.394  |
|                         |    | 11 | 35  | -23.10 | ±1.00 | 0.02  | ±0.05 | 0.01 | 0.635  |
|                         |    | 15 | 50  | -23.83 | ±0.90 | 0.17  | ±0.04 | 0.30 | <0.001 |
|                         |    | 22 | 59  | -22.47 | ±0.73 | 0.14  | ±0.04 | 0.15 | 0.003  |
|                         |    | 30 | 51  | -22.62 | ±0.78 | 0.31  | ±0.09 | 0.18 | 0.002  |
| <i>Larix kaempferi</i>  | 54 | 2  | 25  | -27.94 | ±0.59 | 0.10  | ±0.02 | 0.46 | <0.001 |
|                         |    | 4  | 29  | -27.46 | ±0.48 | 0.09  | ±0.02 | 0.46 | <0.001 |
|                         |    | 7  | 44  | -26.65 | ±0.47 | 0.02  | ±0.02 | 0.05 | 0.134  |
|                         |    | 11 | 33  | -26.70 | ±0.36 | 0.06  | ±0.02 | 0.28 | 0.002  |
|                         |    | 15 | 48  | -27.62 | ±0.47 | 0.18  | ±0.02 | 0.64 | <0.001 |
|                         |    | 22 | 56  | -26.20 | ±0.64 | 0.33  | ±0.05 | 0.42 | <0.001 |
|                         |    | 30 | 49  | -26.76 | ±0.51 | 0.85  | ±0.07 | 0.78 | <0.001 |
|                         | 82 | 2  | 50  | -25.32 | ±0.63 | 0.12  | ±0.03 | 0.29 | <0.001 |
|                         |    | 4  | 65  | -25.33 | ±0.45 | 0.16  | ±0.02 | 0.48 | <0.001 |
|                         |    | 7  | 58  | -25.34 | ±0.48 | 0.26  | ±0.03 | 0.63 | <0.001 |
|                         |    | 11 | 67  | -24.19 | ±0.44 | 0.37  | ±0.03 | 0.64 | <0.001 |
|                         |    | 15 | 46  | -23.40 | ±0.62 | 0.50  | ±0.12 | 0.30 | <0.001 |
|                         |    | 22 | 59  | -23.76 | ±0.56 | 0.64  | ±0.11 | 0.36 | <0.001 |
|                         |    | 30 | 48  | -23.99 | ±0.56 | 0.97  | ±0.14 | 0.50 | <0.001 |
| <i>Picea abies</i>      | 54 | 2  | 24  | -25.16 | ±0.54 | 0.08  | ±0.02 | 0.46 | <0.001 |
|                         |    | 4  | 20  | -25.39 | ±1.33 | 0.21  | ±0.05 | 0.47 | 0.001  |
|                         |    | 7  | 30  | -24.09 | ±0.97 | 0.07  | ±0.04 | 0.08 | 0.122  |
|                         |    | 11 | 42  | -23.29 | ±1.19 | 0.14  | ±0.06 | 0.14 | 0.014  |



|                                   |    |    |    |        |       |       |       |      |        |
|-----------------------------------|----|----|----|--------|-------|-------|-------|------|--------|
|                                   |    | 15 | 41 | -25.41 | ±0.79 | 0.43  | ±0.05 | 0.68 | <0.001 |
|                                   |    | 22 | 39 | -23.60 | ±1.02 | 0.50  | ±0.09 | 0.48 | <0.001 |
|                                   |    | 30 | 37 | -23.05 | ±0.66 | 1.24  | ±0.11 | 0.80 | <0.001 |
|                                   | 82 | 2  | 59 | -22.89 | ±0.69 | -0.01 | ±0.03 | 0.00 | 0.635  |
|                                   |    | 4  | 56 | -21.52 | ±1.37 | 0.09  | ±0.06 | 0.04 | 0.139  |
|                                   |    | 7  | 68 | -22.91 | ±0.81 | 0.10  | ±0.04 | 0.09 | 0.013  |
|                                   |    | 11 | 72 | -23.12 | ±0.73 | 0.23  | ±0.04 | 0.34 | <0.001 |
|                                   |    | 15 | 68 | -23.30 | ±0.60 | 0.38  | ±0.04 | 0.57 | <0.001 |
|                                   |    | 22 | 42 | -23.98 | ±0.58 | 0.77  | ±0.08 | 0.68 | <0.001 |
|                                   |    | 30 | 40 | -25.62 | ±0.86 | 2.13  | ±0.29 | 0.59 | <0.001 |
| <i>Prunus armeniaca</i>           | 54 | 2  | 37 | -21.31 | ±0.41 | 0.07  | ±0.02 | 0.24 | 0.002  |
|                                   |    | 4  | 50 | -20.99 | ±0.39 | 0.13  | ±0.02 | 0.60 | <0.001 |
|                                   |    | 7  | 60 | -20.15 | ±0.95 | 0.23  | ±0.05 | 0.30 | <0.001 |
|                                   |    | 11 | 68 | -20.40 | ±0.72 | 1.09  | ±0.10 | 0.62 | <0.001 |
|                                   |    | 15 | 40 | -18.18 | ±1.26 | 0.55  | ±0.09 | 0.50 | <0.001 |
|                                   |    | 22 | 87 | -20.23 | ±0.59 | 0.93  | ±0.09 | 0.58 | <0.001 |
|                                   |    | 30 | 73 | -17.76 | ±0.95 | 1.11  | ±0.17 | 0.39 | <0.001 |
|                                   | 82 | 2  | 61 | -17.73 | ±0.40 | 0.10  | ±0.02 | 0.25 | <0.001 |
|                                   |    | 4  | 96 | -14.32 | ±0.86 | 0.10  | ±0.06 | 0.02 | 0.132  |
|                                   |    | 7  | 68 | -16.09 | ±1.12 | 1.19  | ±0.20 | 0.35 | <0.001 |
|                                   |    | 11 | 39 | -16.30 | ±1.05 | 1.90  | ±0.32 | 0.49 | <0.001 |
|                                   |    | 15 | 29 | -15.89 | ±1.17 | 5.49  | ±0.90 | 0.58 | <0.001 |
|                                   |    | 22 | 25 | -14.82 | ±1.20 | 5.19  | ±0.90 | 0.59 | <0.001 |
|                                   |    | 30 | 24 | -18.03 | ±0.79 | 7.40  | ±0.70 | 0.83 | <0.001 |
| <i>Prunus nigra</i>               | 54 | 2  | 23 | -29.57 | ±1.09 | 0.13  | ±0.04 | 0.34 | 0.003  |
|                                   |    | 4  | 23 | -27.74 | ±1.35 | 0.10  | ±0.01 | 0.16 | 0.061  |
|                                   |    | 7  | 43 | -27.75 | ±1.11 | 0.22  | ±0.06 | 0.47 | <0.001 |
|                                   |    | 11 | 60 | -27.93 | ±0.82 | 0.23  | ±0.12 | 0.48 | <0.001 |
|                                   |    | 15 | 49 | -22.82 | ±1.60 | 0.16  | ±0.19 | 0.10 | 0.025  |
|                                   |    | 22 | 74 | -22.69 | ±1.22 | 0.36  | ±0.19 | 0.14 | 0.001  |
|                                   |    | 30 | 48 | -25.90 | ±1.31 | 1.29  | ±0.04 | 0.58 | <0.001 |
| <i>Rhododendron calendulaceum</i> | 54 | 11 | 40 | -24.26 | ±1.36 | 0.29  | ±0.15 | 0.34 | <0.001 |
|                                   |    | 15 | 50 | -24.88 | ±0.89 | 0.17  | ±0.02 | 0.30 | <0.001 |
|                                   |    | 22 | 50 | -25.54 | ±0.72 | 0.33  | ±0.01 | 0.38 | <0.001 |
|                                   |    | 30 | 69 | -24.59 | ±0.66 | 0.82  | ±0.02 | 0.59 | <0.001 |
